# Supplementary material for: A High-Density SNP and SSR Consensus Map Reveals Segregation Distortion Regions in Wheat
Source: Biomed Res Int. 2015 Oct 27;2015:830618. doi: 10.1155/2015/830618 (PMC4639646; doi:10.1155/2015/830618)
Supplement: Supplementary file 1 — Marker names and genetic distance in cM between markers for the two individual maps and their consensus map constructed from Ning7840 × Clark and Heyne × Lakin populations. [file 830618.f1.xlsx]

## Sheet: Mapping population
Parents	Population	Population size	No. mapped SNP loci	No. mapped SSR loci
Ning7840 x Clark	Recombinant inbred	127	2404	366
Heyne x Lakin	Recombinant inbred	145	2071	170

## Sheet: consensus map
Chromosome	Marker index	Genetic distance(Kosambi,cM)	Marker
1A	IWA4518	0	wsnp_Ex_c6476_11246531
1A	IWA4271	0	wsnp_Ex_c5550_9779698
1A	IWA7289	0	wsnp_Ku_c754_1557338
1A	IWA3764	0.8	wsnp_Ex_c412_814247
1A	IWA6916	0.8	wsnp_Ku_c330_683203
1A	IWA1644	0.8	wsnp_Ex_c1255_2411550
1A	IWA3661	2.5	wsnp_Ex_c3887_7051325
1A	IWA4121	4.2	wsnp_Ex_c52086_55808193
1A	IWA5405	4.2	wsnp_Ex_rep_c67474_66076379
1A	IWA4122	5.4	wsnp_Ex_c52086_55808363
1A	IWA4120	5.4	wsnp_Ex_c52086_55808126
1A	IWA4123	5.4	wsnp_Ex_c52086_55808824
1A	IWA1645	6.6	wsnp_Ex_c1255_2411977
1A	IWA3799	9.5	wsnp_Ex_c4186_7560575
1A	IWA3215	9.5	wsnp_Ex_c2918_5381441
1A	IWA2327	9.6	wsnp_Ex_c1861_3507281
1A	IWA8523	10	wsnp_RFL_Contig3850_4199825
1A	IWA3977	10.6	wsnp_Ex_c46670_52108070
1A	IWA5407	14.6	wsnp_Ex_rep_c67492_66096650
1A	IWA4944	14.6	wsnp_Ex_c9600_15889658
1A	IWA4943	14.6	wsnp_Ex_c9600_15889471
1A	IWA1710	14.6	wsnp_Ex_c12932_20486842
1A	IWA3590	18.2	wsnp_Ex_c36911_44767554
1A	IWA2015	18.2	wsnp_Ex_c15377_23637176
1A	IWA5097	18.2	wsnp_Ex_rep_c103474_88421290
1A	IWA8051	19.3	wsnp_Ra_c6891_11974621
1A	IWA2035	19.3	wsnp_Ex_c1557_2973321
1A	IWA1560	19.3	wsnp_Ex_c11939_19147790
1A	IWA1559	19.3	wsnp_Ex_c11939_19147602
1A	IWA4021	20.1	wsnp_Ex_c48407_53323483
1A	IWA3378	20.1	wsnp_Ex_c3201_5910659
1A	IWA3377	20.1	wsnp_Ex_c3201_5910642
1A	IWA4022	20.1	wsnp_Ex_c48407_53323801
1A	Xcfa2147	48.9
1A	Xcfa2219	48.9
1A	Xwmc716	48.9
1A	IWA7428	62.1	wsnp_Ku_rep_c109724_94227136
1A	IWA5900	62.1	wsnp_JD_c19419_17536513
1A	IWA4934	62.1	wsnp_Ex_c9546_15810886
1A	IWA3284	62.1	wsnp_Ex_c30552_39457767
1A	IWA2819	62.1	wsnp_Ex_c23598_32827681
1A	IWA2818	62.1	wsnp_Ex_c23598_32826926
1A	IWA1587	62.1	wsnp_Ex_c12123_19388313
1A	IWA1404	62.1	wsnp_Ex_c10903_17717179
1A	IWA672	62.1	wsnp_CAP11_c146_160903
1A	IWA475	62.1	wsnp_BF474340A_Ta_2_1
1A	IWA7591	62.1	wsnp_Ra_c12759_20345987
1A	IWA5505	63.1	wsnp_Ex_rep_c68171_66944702
1A	IWA1225	66	wsnp_CAP8_rep_c3938_1936666
1A	IWA6081	66	wsnp_JD_c4904_6034093
1A	IWA1790	66.3	wsnp_Ex_c1359_2604298
1A	IWA5822	66.3	wsnp_JD_c13024_13129681
1A	IWA1195	67.8	wsnp_CAP8_c4785_2322876
1A	IWA691	67.8	wsnp_CAP11_c1815_982483
1A	IWA6091	67.8	wsnp_JD_c5144_6266384
1A	IWA5047	68.1	wsnp_Ex_rep_c102067_87314043
1A	IWA5046	68.1	wsnp_Ex_rep_c102067_87313597
1A	IWA8334	68.5	wsnp_RFL_Contig2409_1937215
1A	IWA3962	68.5	wsnp_Ex_c4612_8254533
1A	IWA3195	68.5	wsnp_Ex_c28900_37982485
1A	IWA3060	68.5	wsnp_Ex_c26688_35918122
1A	IWA136	68.5	wsnp_BE443588A_Ta_2_2
1A	IWA135	68.5	wsnp_BE443588A_Ta_2_1
1A	IWA3804	69.6	wsnp_Ex_c41953_48657850
1A	IWA3435	69.6	wsnp_Ex_c33452_41938159
1A	IWA6042	69.6	wsnp_JD_c3973_5044238
1A	IWA3434	70	wsnp_Ex_c33452_41938013
1A	IWA3805	70	wsnp_Ex_c41953_48658353
1A	IWA7754	73.7	wsnp_Ra_c22110_31550370
1A	IWA577	75.2	wsnp_BG606986A_Ta_2_1
1A	IWA578	75.2	wsnp_BG606986A_Ta_2_4
1A	IWA5832	76.3	wsnp_JD_c13384_13393159
1A	IWA1081	77.8	wsnp_CAP7_c3472_1623955
1A	IWA8212	80.5	wsnp_Ra_rep_c95460_83855592
1A	IWA5534	82.4	wsnp_Ex_rep_c68493_67320068
1A	IWA3405	82.4	wsnp_Ex_c3258_6004611
1A	IWA7570	82.4	wsnp_Ra_c11594_18777085
1A	IWA5493	82.8	wsnp_Ex_rep_c68085_66839109
1A	IWA3859	83.1	wsnp_Ex_c43228_49605281
1A	IWA339	84.5	wsnp_BE517729A_Ta_2_1
1A	IWA2314	90.7	wsnp_Ex_c1845_3472790
1A	IWA601	91.9	wsnp_BM137879A_Ta_2_1
1A	IWA1979	93.2	wsnp_Ex_c15088_23268345
1A	IWA2540	100	wsnp_Ex_c20489_29564938
1A	IWA931	100	wsnp_CAP12_c1960_972031
1A	IWA605	100	wsnp_BM140362A_Ta_2_2
1A	IWA4511	100	wsnp_Ex_c6452_11213329
1A	IWA6595	100.8	wsnp_Ku_c1642_3232242
1A	IWA6553	102.6	wsnp_Ku_c15214_23756800
1A	IWA7868	103	wsnp_Ra_c3270_6136110
1A	IWA7869	103	wsnp_Ra_c3270_6136601
1A	IWA6707	103.4	wsnp_Ku_c21316_31053745
1A	IWA6708	103.4	wsnp_Ku_c21316_31053776
1A	IWA5174	103.8	wsnp_Ex_rep_c109742_92411838
1A	IWA5568	108	wsnp_Ex_rep_c68857_67737959
1A	IWA2598	108	wsnp_Ex_c21336_30465618
1A	IWA2584	108	wsnp_Ex_c21193_30320134
1A	IWA5777	108	wsnp_JD_c10777_11374000
1A	IWA4116	111.4	wsnp_Ex_c5192_9203100
1A	IWA3891	111.4	wsnp_Ex_c44263_50363536
1A	IWA3134	111.4	wsnp_Ex_c27940_37101775
1A	IWA1608	111.4	wsnp_Ex_c12336_19686808
1A	IWA7577	111.4	wsnp_Ra_c12148_19539667
1A	IWA3820	111.8	wsnp_Ex_c42282_48900922
1A	IWA3613	111.8	wsnp_Ex_c37470_45211843
1A	IWA3475	111.8	wsnp_Ex_c34344_42676379
1A	IWA7018	111.8	wsnp_Ku_c39878_48218985
1A	IWA4816	112.2	wsnp_Ex_c8588_14419007
1A	IWA6751	112.2	wsnp_Ku_c23926_33870364
1A	IWA1594	112.5	wsnp_Ex_c12165_19452361
1A	IWA5277	112.9	wsnp_Ex_rep_c66628_64934660
1A	IWA3477	112.9	wsnp_Ex_c34344_42677360
1A	IWA7898	112.9	wsnp_Ra_c37745_45806931
1A	IWA6709	113.4	wsnp_Ku_c21356_31093507
1A	IWA6756	113.4	wsnp_Ku_c24239_34199356
1A	IWA4117	113.4	wsnp_Ex_c5192_9203682
1A	IWA16	113.4	wsnp_BE399999A_Ta_2_1
1A	IWA4292	114.3	wsnp_Ex_c56097_58352130
1A	IWA4291	114.3	wsnp_Ex_c56097_58351893
1A	IWA2995	114.3	wsnp_Ex_c25734_34995416
1A	IWA7173	114.3	wsnp_Ku_c557_1166684
1A	IWA6218	114.6	wsnp_JD_c9291_10157217
1A	IWA7021	115.2	wsnp_Ku_c4018_7333828
1A	IWA4328	115.2	wsnp_Ex_c572_1138770
1A	IWA4326	115.2	wsnp_Ex_c572_1138339
1A	IWA7824	115.2	wsnp_Ra_c2895_5488879
1A	Xgwm357	117.2
1A	IWA5310	121	wsnp_Ex_rep_c66846_65240088
1A	IWA3884	126.7	wsnp_Ex_c44049_50205904
1A	IWA7879	127	wsnp_Ra_c34203_42948357
1A	IWA7922	127	wsnp_Ra_c41581_48764320
1A	IWA290	127	wsnp_BE497361A_Ta_1_1
1A	IWA1990	127.3	wsnp_Ex_c15188_23387523
1A	IWA4061	129.4	wsnp_Ex_c49829_54319220
1A	IWA1934	129.4	wsnp_Ex_c14733_22819625
1A	IWA492	129.4	wsnp_BF478737A_Ta_2_1
1A	IWA8255	129.4	wsnp_RFL_Contig1736_858448
1A	IWA1142	130.3	wsnp_CAP8_c1141_707721
1A	IWA5339	130.3	wsnp_Ex_rep_c66980_65419811
1A	IWA1933	130.6	wsnp_Ex_c14733_22819350
1A	IWA4071	130.6	wsnp_Ex_c50235_54588957
1A	IWA5866	137.1	wsnp_JD_c15748_15112101
1A	IWA6431	137.1	wsnp_Ku_c11769_19153951
1A	IWA217	137.8	wsnp_BE490041A_Ta_2_1
1A	IWA6941	139.7	wsnp_Ku_c34659_43981982
1A	IWA3374	140.5	wsnp_Ex_c31983_40709866
1A	IWA3373	140.5	wsnp_Ex_c31983_40709607
1A	IWA944	140.8	wsnp_CAP12_c2438_1180601
1A	IWA1724	141.1	wsnp_Ex_c1309_2502521
1A	IWA3375	143.1	wsnp_Ex_c31983_40710608
1A	IWA7796	144.2	wsnp_Ra_c26191_35761997
1A	IWA6217	145.4	wsnp_JD_c9290_10155594
1A	IWA6441	152.9	wsnp_Ku_c11896_19337444
1A	IWA1387	152.9	wsnp_Ex_c10783_17554146
1A	IWA4163	153.4	wsnp_Ex_c5323_9408829
1A	IWA4506	157.2	wsnp_Ex_c64327_63176640
1A	IWA6421	166.6	wsnp_Ku_c11447_18691457
1A	IWA7051	166.6	wsnp_Ku_c42925_50551343
1A	IWA3182	168	wsnp_Ex_c2868_5293485
1A	IWA4524	168.3	wsnp_Ex_c64882_63506752
1A	IWA7559	168.9	wsnp_Ra_c11211_18227610
1A	IWA6644	168.9	wsnp_Ku_c1818_3557408
1A	IWA5065	168.9	wsnp_Ex_rep_c102387_87569964
1A	IWA3181	168.9	wsnp_Ex_c2868_5293115
1A	IWA3180	168.9	wsnp_Ex_c2868_5293000
1A	IWA3179	168.9	wsnp_Ex_c2868_5292662
1A	IWA1603	168.9	wsnp_Ex_c12254_19575022
1A	IWA1602	168.9	wsnp_Ex_c12254_19574891
1A	IWA8622	168.9	wsnp_RFL_Contig4735_5673999
1A	IWA4505	169.8	wsnp_Ex_c6420_11162653
1A	IWA4351	169.8	wsnp_Ex_c57982_59470152
1A	IWA1970	169.8	wsnp_Ex_c15006_23165707
1A	IWA5150	169.8	wsnp_Ex_rep_c106111_90308719
1A	IWA6649	169.8	wsnp_Ku_c183_358844
1A	IWA1375	170.7	wsnp_Ex_c10657_17376086
1A	IWA6645	170.7	wsnp_Ku_c1818_3557849
1A	IWA6172	172.6	wsnp_JD_c7522_8606553
1A	IWA4753	172.6	wsnp_Ex_c7965_13519586
1A	IWA6889	172.6	wsnp_Ku_c3097_5801027
1A	IWA3224	173.2	wsnp_Ex_c293_568283
1A	IWA7191	173.2	wsnp_Ku_c5756_10191339
1A	IWA98	174.1	wsnp_BE438866A_Ta_2_8
1A	IWA414	175.5	wsnp_BF200531A_Ta_2_1
1A	IWA1479	176.4	wsnp_Ex_c1137_2182795
1A	IWA4754	176.4	wsnp_Ex_c7965_13520238
1A	IWA4644	176.9	wsnp_Ex_c7252_12453079
1A	IWA1481	176.9	wsnp_Ex_c1137_2183772
1A	IWA3635	177.7	wsnp_Ex_c38203_45790396
1B	IWA1020	0	wsnp_CAP7_c1001_511228
1B	IWA8542	0.4	wsnp_RFL_Contig395_4387107
1B	IWA1825	0.9	wsnp_Ex_c13878_21738866
1B	IWA3043	1.9	wsnp_Ex_c2639_4899517
1B	IWA8139	2.3	wsnp_Ra_rep_c109381_92361154
1B	IWA1092	2.9	wsnp_CAP7_c4778_2155754
1B	IWA8543	7.8	wsnp_RFL_Contig3951_4390396
1B	IWA696	7.8	wsnp_CAP11_c1902_1022590
1B	IWA7422	13.8	wsnp_Ku_rep_c107952_93214466
1B	IWA5447	15.3	wsnp_Ex_rep_c67747_66422869
1B	IWA5446	15.3	wsnp_Ex_rep_c67747_66422495
1B	IWA3097	15.3	wsnp_Ex_c27176_36393952
1B	IWA3098	15.3	wsnp_Ex_c27176_36393984
1B	IWA7619	15.3	wsnp_Ra_c13959_21943006
1B	IWA5352	18.5	wsnp_Ex_rep_c67098_65573819
1B	IWA8507	18.5	wsnp_RFL_Contig3738_3992954
1B	IWA2064	21.3	wsnp_Ex_c15796_24173348
1B	IWA415	24.2	wsnp_BF200640B_Ta_2_1
1B	IWA3189	29.9	wsnp_Ex_c28733_37836638
1B	IWA2890	31.2	wsnp_Ex_c24318_33562395
1B	IWA2586	31.6	wsnp_Ex_c21198_30326388
1B	IWA2588	31.6	wsnp_Ex_c21198_30327016
1B	IWA7527	32.4	wsnp_Ku_rep_c89089_82009060
1B	IWA5160	32.4	wsnp_Ex_rep_c107911_91350930
1B	IWA5159	32.4	wsnp_Ex_rep_c107911_91350866
1B	IWA4091	32.4	wsnp_Ex_c5101_9053178
1B	IWA4090	32.4	wsnp_Ex_c5101_9052671
1B	IWA2790	32.4	wsnp_Ex_c23235_32471767
1B	IWA2788	32.4	wsnp_Ex_c23230_32466568
1B	IWA2041	32.4	wsnp_Ex_c15611_23929128
1B	IWA1729	32.4	wsnp_Ex_c13109_20725640
1B	IWA6479	32.4	wsnp_Ku_c13043_20902807
1B	IWA734	32.4	wsnp_CAP11_c287_244799
1B	IWA2040	32.4	wsnp_Ex_c15611_23928961
1B	IWA7811	32.4	wsnp_Ra_c2748_5223434
1B	IWA4940	32.7	wsnp_Ex_c9577_15857679
1B	IWA4702	32.7	wsnp_Ex_c7585_12955306
1B	IWA4703	32.7	wsnp_Ex_c7585_12957020
1B	IWA4939	32.7	wsnp_Ex_c9577_15857465
1B	IWA2889	32.7	wsnp_Ex_c24318_33561600
1B	IWA7040	32.7	wsnp_Ku_c4175_7603236
1B	IWA3684	35.1	wsnp_Ex_c39616_46871127
1B	IWA5227	35.1	wsnp_Ex_rep_c66389_64588691
1B	IWA4999	35.4	wsnp_Ex_rep_c101231_86636951
1B	IWA4819	35.4	wsnp_Ex_c8625_14468525
1B	IWA2315	35.4	wsnp_Ex_c18462_27305612
1B	IWA1890	35.4	wsnp_Ex_c1440_2764867
1B	IWA1889	35.4	wsnp_Ex_c1440_2764269
1B	IWA606	35.4	wsnp_BM140362B_Ta_1_1
1B	IWA946	36	wsnp_CAP12_c257_143515
1B	IWA7037	39.2	wsnp_Ku_c41261_49287074
1B	IWA6294	39.2	wsnp_JD_rep_c63201_40318622
1B	IWA2411	39.2	wsnp_Ex_c194_381656
1B	IWA2308	39.2	wsnp_Ex_c18384_27213023
1B	IWA255	39.2	wsnp_BE494527B_Ta_2_1
1B	IWA4155	42.9	wsnp_Ex_c5296_9365860
1B	IWA4153	42.9	wsnp_Ex_c5296_9365528
1B	IWA4154	42.9	wsnp_Ex_c5296_9365847
1B	IWA6646	42.9	wsnp_Ku_c18227_27490539
1B	IWA579	46.7	wsnp_BG606986B_Ta_2_1
1B	IWA1164	47.3	wsnp_CAP8_c2023_1110474
1B	IWA4488	48	wsnp_Ex_c6378_11086366
1B	IWA8313	48.1	wsnp_RFL_Contig2220_1597321
1B	IWA1859	48.7	wsnp_Ex_c1412_2711077
1B	IWA3120	50.1	wsnp_Ex_c27644_36826484
1B	IWA2717	54.3	wsnp_Ex_c22439_31632880
1B	IWA5962	54.3	wsnp_JD_c2636_3554874
1B	IWA3076	54.3	wsnp_Ex_c26860_36084209
1B	IWA5228	54.5	wsnp_Ex_rep_c66389_64588992
1B	IWA5229	54.5	wsnp_Ex_rep_c66389_64589189
1B	IWA8111	54.8	wsnp_Ra_rep_c101899_87126448
1B	IWA4361	55.1	wsnp_Ex_c58292_59652859
1B	Xbarc61	56.1
1B	IWA5070	56.9	wsnp_Ex_rep_c102633_87756283
1B	IWA4139	56.9	wsnp_Ex_c5245_9283053
1B	IWA3713	56.9	wsnp_Ex_c402_791233
1B	IWA6018	56.9	wsnp_JD_c35642_26554827
1B	IWA6731	56.9	wsnp_Ku_c23096_32987510
1B	IWA6134	56.9	wsnp_JD_c6331_7499499
1B	IWA4680	57.3	wsnp_Ex_c7447_12751589
1B	IWA540	57.3	wsnp_BG274294B_Ta_2_3
1B	IWA4681	57.3	wsnp_Ex_c7447_12752449
1B	IWA2626	57.7	wsnp_Ex_c21559_30710510
1B	IWA854	57.8	wsnp_CAP11_rep_c4185_1977142
1B	IWA1231	58.2	wsnp_CAP8_rep_c4452_2170021
1B	IWA1005	58.2	wsnp_CAP12_rep_c4157_1894383
1B	IWA775	58.2	wsnp_CAP11_c543_375403
1B	IWA2861	58.6	wsnp_Ex_c23992_33235984
1B	IWA5076	58.6	wsnp_Ex_rep_c102909_87976721
1B	IWA5779	59.4	wsnp_JD_c11014_11565501
1B	IWA573	59.6	wsnp_BG606586B_Ta_2_13
1B	IWA3307	61.1	wsnp_Ex_c30969_39821293
1B	IWA491	61.1	wsnp_BF478690B_Ta_2_1
1B	IWA3945	61.1	wsnp_Ex_c4561_8184576
1B	IWA7982	61.5	wsnp_Ra_c5088_9081927
1B	IWA7787	61.5	wsnp_Ra_c25590_35156699
1B	IWA6917	61.5	wsnp_Ku_c33028_42580216
1B	IWA4204	61.5	wsnp_Ex_c53976_57027796
1B	IWA4203	61.5	wsnp_Ex_c53976_57027635
1B	IWA3476	61.5	wsnp_Ex_c34344_42677130
1B	IWA2084	61.5	wsnp_Ex_c1600_3051075
1B	IWA1959	61.5	wsnp_Ex_c1495_2864718
1B	IWA790	61.5	wsnp_CAP11_c6264_2895652
1B	IWA8281	61.5	wsnp_RFL_Contig2000_1193707
1B	IWA7560	61.9	wsnp_Ra_c11232_18256748
1B	IWA6107	62.2	wsnp_JD_c5659_6814240
1B	Xwmc419	62.3
1B	IWA4557	62.7	wsnp_Ex_c6611_11452297
1B	IWA4556	62.7	wsnp_Ex_c6611_11451949
1B	IWA7017	62.7	wsnp_Ku_c39862_48205590
1B	IWA4987	63.8	wsnp_Ex_c9960_16397347
1B	IWA6684	64.3	wsnp_Ku_c20139_29729256
1B	IWA6073	64.3	wsnp_JD_c4641_5774711
1B	IWA5348	64.3	wsnp_Ex_rep_c67036_65492436
1B	IWA4198	64.3	wsnp_Ex_c5388_9527189
1B	IWA2221	64.3	wsnp_Ex_c17452_26163465
1B	IWA6758	64.3	wsnp_Ku_c24323_34285350
1B	IWA890	64.7	wsnp_CAP11_rep_c8576_3700031
1B	IWA4197	64.7	wsnp_Ex_c5388_9526777
1B	IWA189	64.9	wsnp_BE446240B_Ta_2_3
1B	IWA188	64.9	wsnp_BE446240B_Ta_2_1
1B	IWA7594	64.9	wsnp_Ra_c12888_20519578
1B	IWA8081	65.1	wsnp_Ra_c8484_14372772
1B	IWA7723	65.1	wsnp_Ra_c2027_3945764
1B	IWA7722	65.1	wsnp_Ra_c2027_3945713
1B	IWA7721	65.1	wsnp_Ra_c2027_3943938
1B	IWA7119	65.1	wsnp_Ku_c4951_8856170
1B	IWA5664	65.1	wsnp_Ex_rep_c69986_68942834
1B	IWA6063	65.1	wsnp_JD_c4485_5618761
1B	IWA5665	65.1	wsnp_Ex_rep_c69986_68942866
1B	IWA4811	65.1	wsnp_Ex_c852_1657319
1B	IWA3588	65.1	wsnp_Ex_c3681_6716255
1B	IWA3587	65.1	wsnp_Ex_c3681_6715277
1B	IWA3502	65.1	wsnp_Ex_c34966_43196962
1B	IWA2517	65.1	wsnp_Ex_c2025_3799847
1B	IWA767	65.1	wsnp_CAP11_c4558_2144436
1B	IWA1121	65.1	wsnp_CAP7_rep_c5502_2471298
1B	IWA1109	65.1	wsnp_CAP7_c940_480745
1B	IWA141	65.1	wsnp_BE443930B_Ta_2_2
1B	IWA128	65.1	wsnp_BE443332B_Ta_2_2
1B	IWA8082	65.1	wsnp_Ra_c8484_14372815
1B	IWA8148	67.2	wsnp_Ra_rep_c111777_93910754
1B	IWA6891	67.9	wsnp_Ku_c30982_40765341
1B	IWA6890	67.9	wsnp_Ku_c30982_40765254
1B	IWA6259	67.9	wsnp_JD_rep_c49357_33576509
1B	IWA3631	67.9	wsnp_Ex_c38116_45719983
1B	IWA7977	67.9	wsnp_Ra_c49942_54740532
1B	IWA4975	68.3	wsnp_Ex_c9902_16309166
1B	IWA3620	68.3	wsnp_Ex_c37635_45347415
1B	IWA8619	68.3	wsnp_RFL_Contig4726_5654774
1B	IWA8392	68.7	wsnp_RFL_Contig2794_2564017
1B	IWA8338	68.7	wsnp_RFL_Contig2449_2013497
1B	IWA7219	68.7	wsnp_Ku_c62848_63784645
1B	IWA6703	68.7	wsnp_Ku_c2115_4089288
1B	IWA5681	68.7	wsnp_Ex_rep_c70284_69228305
1B	IWA5593	68.7	wsnp_Ex_rep_c69266_68192954
1B	IWA4389	68.7	wsnp_Ex_c5947_10431109
1B	IWA1451	68.7	wsnp_Ex_c11177_18096010
1B	IWA8506	68.7	wsnp_RFL_Contig373_3974834
1B	IWA131	70.1	wsnp_BE443531B_Ta_1_1
1B	IWA7578	75.4	wsnp_Ra_c12151_19543036
1B	IWA6945	76.4	wsnp_Ku_c34980_44256215
1B	IWA5635	76.8	wsnp_Ex_rep_c69766_68723140
1B	IWA361	78.4	wsnp_BE586140B_Ta_2_1
1B	IWA1578	78.4	wsnp_Ex_c12063_19310114
1B	IWA7480	81.1	wsnp_Ku_rep_c70742_70379526
1B	IWA6449	81.1	wsnp_Ku_c11987_19473555
1B	IWA4504	81.1	wsnp_Ex_c6417_11155739
1B	IWA1948	81.1	wsnp_Ex_c14832_22953585
1B	IWA7703	81.1	wsnp_Ra_c19335_28504388
1B	IWA2998	83.1	wsnp_Ex_c25782_35041189
1B	Xgwm18	95.7
1B	Xgwm11	101.9
1B	Xbarc185	107.8
1B	IWA7399	116.2	wsnp_Ku_rep_c103074_89905152
1B	IWA406	116.2	wsnp_BE637971B_Ta_1_20
1B	IWA435	116.2	wsnp_BF291549B_Ta_1_1
1B	IWA466	116.2	wsnp_BF473056D_Ta_2_1
1B	IWA764	116.2	wsnp_CAP11_c3968_1874257
1B	IWA974	116.2	wsnp_CAP12_c55_32598
1B	IWA1191	116.2	wsnp_CAP8_c4576_2228073
1B	IWA1399	116.2	wsnp_Ex_c10869_17671164
1B	IWA1566	116.2	wsnp_Ex_c11976_19193550
1B	IWA1957	116.2	wsnp_Ex_c1493_2860766
1B	IWA1958	116.2	wsnp_Ex_c1493_2862065
1B	IWA1991	116.2	wsnp_Ex_c15188_23387754
1B	IWA2561	116.2	wsnp_Ex_c20975_30093113
1B	IWA2655	116.2	wsnp_Ex_c2181_4089639
1B	IWA2881	116.2	wsnp_Ex_c24176_33424905
1B	IWA3115	116.2	wsnp_Ex_c2749_5091813
1B	IWA3155	116.2	wsnp_Ex_c28287_37424983
1B	IWA3690	116.2	wsnp_Ex_c39661_46902689
1B	IWA3875	116.2	wsnp_Ex_c43586_49862663
1B	IWA4350	116.2	wsnp_Ex_c5780_10154132
1B	IWA4715	116.2	wsnp_Ex_c7705_13139890
1B	IWA4764	116.2	wsnp_Ex_c8052_13645549
1B	IWA4974	116.2	wsnp_Ex_c9872_16271161
1B	IWA8409	116.2	wsnp_RFL_Contig295_2803175
1B	IWA5976	116.2	wsnp_JD_c2805_3748370
1B	IWA8199	116.2	wsnp_Ra_rep_c74968_72704437
1B	IWA8001	116.2	wsnp_Ra_c5485_9703900
1B	IWA6450	116.2	wsnp_Ku_c11987_19473636
1B	IWA6448	116.2	wsnp_Ku_c11987_19472688
1B	IWA7605	116.2	wsnp_Ra_c13316_21100830
1B	IWA7385	116.2	wsnp_Ku_rep_c101863_88951284
1B	IWA7331	116.2	wsnp_Ku_c8592_14575931
1B	IWA7151	116.2	wsnp_Ku_c52464_57427549
1B	IWA7059	116.2	wsnp_Ku_c4373_7947422
1B	IWA6964	116.2	wsnp_Ku_c3695_6810121
1B	IWA6836	116.2	wsnp_Ku_c28164_38103270
1B	IWA6621	116.2	wsnp_Ku_c17177_26216230
1B	IWA6611	116.2	wsnp_Ku_c16938_25916279
1B	IWA6610	116.2	wsnp_Ku_c16938_25916260
1B	IWA6541	116.2	wsnp_Ku_c14842_23275194
1B	IWA6444	116.2	wsnp_Ku_c11955_19422034
1B	IWA6260	116.2	wsnp_JD_rep_c49359_33578909
1B	IWA6129	116.2	wsnp_JD_c626_945114
1B	IWA6110	116.2	wsnp_JD_c5757_6915127
1B	IWA6062	116.2	wsnp_JD_c4444_5575748
1B	IWA5702	116.2	wsnp_Ex_rep_c70593_69508988
1B	IWA5691	116.2	wsnp_Ex_rep_c70345_69290532
1B	IWA5435	116.2	wsnp_Ex_rep_c67665_66326492
1B	IWA5370	116.2	wsnp_Ex_rep_c67198_65702998
1B	IWA5133	116.2	wsnp_Ex_rep_c105244_89727546
1B	IWA4555	116.2	wsnp_Ex_c66106_64268316
1B	IWA3123	116.9	wsnp_Ex_c27739_36913084
1B	IWA7398	116.9	wsnp_Ku_rep_c103074_89904851
1D	IWA3548	0	wsnp_Ex_c35886_43950102
1D	IWA5731	0	wsnp_Ex_rep_c71376_70138381
1D	IWA3549	8.1	wsnp_Ex_c35886_43950574
1D	IWA4489	8.1	wsnp_Ex_c6378_11087794
1D	IWA3547	8.1	wsnp_Ex_c35886_43949442
1D	IWA3790	10	wsnp_Ex_c4162_7519423
1D	IWA474	11.5	wsnp_BF474139D_Ta_2_1
1D	IWA3420	11.5	wsnp_Ex_c32956_41523146
1D	IWA7848	12.6	wsnp_Ra_c31132_40304115
1D	IWA1464	40.8	wsnp_Ex_c1130_2166731
1D	IWA2164	41.2	wsnp_Ex_c16720_25268525
1D	IWA5163	41.2	wsnp_Ex_rep_c108057_91436561
1D	IWA165	42.9	wsnp_BE445121D_Ta_2_2
1D	IWA1192	44.2	wsnp_CAP8_c458_368125
1D	IWA1193	44.2	wsnp_CAP8_c458_368155
1D	IWA980	45.7	wsnp_CAP12_c633_339740
1D	IWA830	45.7	wsnp_CAP11_rep_c4017_1896951
1D	IWA642	45.7	wsnp_CAP11_c1043_618449
1D	IWA1221	45.7	wsnp_CAP8_rep_c3713_1832742
1D	IWA362	47.1	wsnp_BE586140D_Ta_2_2
1D	IWA57	47.1	wsnp_BE405518D_Ta_2_3
1D	IWA5019	47.3	wsnp_Ex_rep_c101500_86856438
1D	IWA5018	47.3	wsnp_Ex_rep_c101500_86856089
1D	IWA5020	47.3	wsnp_Ex_rep_c101500_86856679
1D	IWA1544	57	wsnp_Ex_c11866_19039540
1D	IWA8551	59.5	wsnp_CAP11_c2307_1200406
1D	IWA713	68.6	wsnp_CAP11_c2307_1200406
1D	IWA4645	68.6	wsnp_Ex_c7252_12454704
1D	IWA4716	69.7	wsnp_Ex_c7705_13141187
1D	IWA7533	69.7	wsnp_Ra_c1020_2062200
1D	IWA7797	75.4	wsnp_Ra_c2633_5017265
1D	IWA1397	75.9	wsnp_Ex_c1085_2078944
1D	IWA1773	75.9	wsnp_Ex_c13421_21142520
1D	IWA6960	76.8	wsnp_Ku_c3682_6786230
1D	IWA2269	76.8	wsnp_Ex_c17884_26647952
1D	IWA1789	76.8	wsnp_Ex_c1358_2602235
1D	IWA1788	76.8	wsnp_Ex_c1358_2601510
1D	IWA1787	76.8	wsnp_Ex_c1358_2600929
1D	IWA2268	76.8	wsnp_Ex_c17884_26647833
1D	IWA7968	76.8	wsnp_Ra_c48124_53475145
1D	IWA7967	76.8	wsnp_Ra_c48124_53475114
1D	IWA6487	76.8	wsnp_Ku_c13229_21141168
1D	IWA2449	76.8	wsnp_Ex_c1969_3705930
1D	IWA1396	76.8	wsnp_Ex_c1085_2078686
1D	IWA407	76.8	wsnp_BE637971D_Ta_2_3
1D	Xwmc432	78.1
1D	IWA5996	89.5	wsnp_JD_c3091_4079762
1D	IWA3753	89.5	wsnp_Ex_c41048_47969948
1D	IWA3125	89.5	wsnp_Ex_c278_538285
2A	IWA5855	0	wsnp_JD_c15127_14676522
2A	IWA2640	1	wsnp_Ex_c21709_30869795
2A	IWA5878	1.1	wsnp_JD_c169_270144
2A	IWA5463	1.1	wsnp_Ex_rep_c67848_66550974
2A	IWA6845	1.1	wsnp_Ku_c28467_38394907
2A	IWA7593	1.7	wsnp_Ra_c12874_20497763
2A	IWA8377	1.9	wsnp_RFL_Contig2729_2446041
2A	IWA7148	2.9	wsnp_Ku_c52392_57380485
2A	IWA7339	3.1	wsnp_Ku_c8927_15048149
2A	IWA4562	3.1	wsnp_Ex_c6660_11526924
2A	IWA2092	3.1	wsnp_Ex_c1604_3060855
2A	IWA4732	3.1	wsnp_Ex_c7829_13320738
2A	IWA4733	3.1	wsnp_Ex_c7829_13320760
2A	IWA1275	3.1	wsnp_Ex_c10084_16572374
2A	IWA542	3.1	wsnp_BG274584A_Ta_2_4
2A	IWA541	3.1	wsnp_BG274584A_Ta_2_1
2A	IWA3597	3.1	wsnp_Ex_c37089_44908383
2A	IWA7433	3.7	wsnp_Ku_rep_c68130_66991591
2A	IWA5462	3.7	wsnp_Ex_rep_c67848_66550913
2A	IWA5216	3.7	wsnp_Ex_rep_c66358_64543401
2A	IWA5215	3.7	wsnp_Ex_rep_c66358_64543218
2A	IWA5214	3.7	wsnp_Ex_rep_c66358_64543089
2A	IWA7540	3.7	wsnp_Ra_c10658_17500498
2A	IWA5244	4.3	wsnp_Ex_rep_c66465_64708722
2A	IWA7998	4.3	wsnp_Ra_c5443_9643191
2A	IWA6499	4.7	wsnp_Ku_c136_271700
2A	IWA6503	4.7	wsnp_Ku_c13700_21770090
2A	IWA6844	5.4	wsnp_Ku_c28467_38394887
2A	IWA2884	5.4	wsnp_Ex_c2426_4542393
2A	IWA2835	5.4	wsnp_Ex_c23768_33006588
2A	IWA7166	5.4	wsnp_Ku_c54793_58953037
2A	IWA3988	6.1	wsnp_Ex_c47157_52450090
2A	IWA3629	7.2	wsnp_Ex_c3808_6925015
2A	IWA6592	7.2	wsnp_Ku_c16358_25225060
2A	IWA3628	7.5	wsnp_Ex_c3808_6924802
2A	IWA2612	18.5	wsnp_Ex_c21409_30544027
2A	IWA3199	21.9	wsnp_Ex_c28942_38018762
2A	IWA5640	22.4	wsnp_Ex_rep_c69799_68761171
2A	IWA4396	22.4	wsnp_Ex_c5984_10493714
2A	IWA3718	22.4	wsnp_Ex_c40280_47375312
2A	IWA6270	22.4	wsnp_JD_rep_c50243_34277175
2A	IWA6090	22.4	wsnp_JD_c514_782019
2A	IWA6089	22.4	wsnp_JD_c514_781859
2A	IWA5574	22.4	wsnp_Ex_rep_c69014_67914888
2A	IWA5449	22.4	wsnp_Ex_rep_c67751_66428606
2A	IWA5409	22.4	wsnp_Ex_rep_c67530_66144244
2A	IWA7547	22.4	wsnp_Ra_c107797_91270622
2A	IWA240	26.3	wsnp_BE490763A_Ta_1_2
2A	IWA241	26.3	wsnp_BE490763A_Ta_1_3
2A	IWA7947	33.8	wsnp_Ra_c4503_8155485
2A	IWA488	34.9	wsnp_BF475068A_Ta_2_1
2A	IWA1174	34.9	wsnp_CAP8_c2677_1394934
2A	IWA2807	36.1	wsnp_Ex_c2337_4379619
2A	IWA3151	37.5	wsnp_Ex_c28204_37349164
2A	IWA70	38.8	wsnp_BE406351A_Ta_2_2
2A	IWA69	38.8	wsnp_BE406351A_Ta_2_1
2A	IWA33	38.8	wsnp_BE403597A_Ta_2_2
2A	IWA32	38.8	wsnp_BE403597A_Ta_2_1
2A	IWA2907	40.2	wsnp_Ex_c24523_33770410
2A	IWA3992	40.2	wsnp_Ex_c47370_52604482
2A	IWA2948	40.5	wsnp_Ex_c25057_34318425
2A	IWA2262	42.2	wsnp_Ex_c17852_26612172
2A	IWA2758	43.9	wsnp_Ex_c22862_32074455
2A	IWA534	43.9	wsnp_BG263521A_Ta_2_2
2A	IWA533	43.9	wsnp_BG263521A_Ta_2_1
2A	IWA3943	43.9	wsnp_Ex_c45599_51347976
2A	IWA7705	44.9	wsnp_Ra_c19526_28719561
2A	IWA6514	44.9	wsnp_Ku_c14099_22301373
2A	IWA6369	44.9	wsnp_JG_c926_520103
2A	IWA6139	44.9	wsnp_JD_c6436_7600132
2A	IWA5585	44.9	wsnp_Ex_rep_c69124_68035485
2A	IWA5037	44.9	wsnp_Ex_rep_c101866_87158671
2A	IWA4410	44.9	wsnp_Ex_c60588_60977198
2A	IWA2259	44.9	wsnp_Ex_c1782_3365844
2A	IWA1597	44.9	wsnp_Ex_c12219_19526749
2A	IWA7390	44.9	wsnp_Ku_rep_c102140_89178814
2A	IWA6963	0	wsnp_Ku_c3688_6797159
2A	IWA5879	0	wsnp_JD_c16948_15934352
2A	IWA4664	0	wsnp_Ex_c7366_12630537
2A	IWA3687	0	wsnp_Ex_c3964_7181070
2A	IWA7327	0	wsnp_Ku_c850_1758318
2A	IWA2778	0.2	wsnp_Ex_c2311_4327681
2A	IWA4463	0.2	wsnp_Ex_c62466_62094459
2A	IWA7885	1.2	wsnp_Ra_c35335_43895883
2A	IWA4461	1.2	wsnp_Ex_c62466_62094300
2A	IWA4460	1.2	wsnp_Ex_c62466_62093988
2A	IWA4459	1.2	wsnp_Ex_c62466_62093712
2A	IWA4458	1.2	wsnp_Ex_c62466_62093520
2A	IWA4192	1.2	wsnp_Ex_c53729_56868062
2A	IWA3688	1.2	wsnp_Ex_c3964_7181151
2A	IWA2777	1.2	wsnp_Ex_c2311_4327441
2A	IWA1322	1.2	wsnp_Ex_c10411_17037327
2A	IWA966	1.2	wsnp_CAP12_c4611_2104718
2A	IWA5082	1.6	wsnp_Ex_rep_c103072_88111184
2A	IWA3809	1.6	wsnp_Ex_c4204_7594348
2A	IWA5364	1.6	wsnp_Ex_rep_c67149_65635258
2A	IWA551	1.9	wsnp_BG313362A_Ta_2_1
2A	IWA5978	1.9	wsnp_JD_c289_450995
2A	IWA5894	1.9	wsnp_JD_c1872_2603061
2A	IWA4658	2.3	wsnp_Ex_c73454_71499715
2A	IWA6813	2.8	wsnp_Ku_c2713_5145312
2A	IWA552	3.1	wsnp_BG313362D_Ta_2_1
2A	IWA4947	3.1	wsnp_Ex_c9619_15913632
2A	IWA8451	3.1	wsnp_RFL_Contig3286_3338919
2A	IWA6851	3.4	wsnp_Ku_c28820_38731047
2A	IWA4666	3.4	wsnp_Ex_c7366_12631101
2A	IWA5759	3.7	wsnp_Ex_rep_c90786_81061397
2A	Xgwm382	6.2
2A	Xgwm382.2	6.2
2A	IWA5161	0	wsnp_Ex_rep_c108004_91402649
2A	IWA8036	14.3	wsnp_Ra_c6586_11477949
2A	IWA6798	14.3	wsnp_Ku_c26323_36285697
2A	IWA6797	14.3	wsnp_Ku_c26323_36285601
2A	IWA2602	14.3	wsnp_Ex_c2137_4014383
2A	IWA2601	14.3	wsnp_Ex_c2137_4014287
2A	IWA2600	14.3	wsnp_Ex_c2137_4013681
2A	IWA5271	18.3	wsnp_Ex_rep_c66606_64905694
2A	IWA756	24.8	wsnp_CAP11_c360_282889
2A	IWA3897	27.4	wsnp_Ex_c44487_50527786
2A	IWA2370	28.2	wsnp_Ex_c19003_27913936
2A	IWA5872	28.6	wsnp_JD_c16315_15513268
2A	IWA4336	29	wsnp_Ex_c5740_10081171
2A	IWA8041	31.5	wsnp_Ra_c66636_64923321
2A	IWA8040	31.5	wsnp_Ra_c66636_64922359
2A	IWA6548	31.5	wsnp_Ku_c15077_23576078
2A	IWA5686	31.5	wsnp_Ex_rep_c70299_69243835
2A	IWA5685	31.5	wsnp_Ex_rep_c70299_69243401
2A	IWA3243	31.5	wsnp_Ex_c29618_38626291
2A	IWA2938	35	wsnp_Ex_c24964_34219020
2A	IWA5959	35	wsnp_JD_c2578_3489735
2A	IWA5066	36.3	wsnp_Ex_rep_c102390_87572532
2A	IWA6931	36.3	wsnp_Ku_c33884_43306422
2A	IWA1539	36.7	wsnp_Ex_c11827_18986376
2A	IWA3752	36.7	wsnp_Ex_c41007_47932833
2A	IWA684	36.7	wsnp_CAP11_c1711_934478
2A	Xwmc181	43.6
2A	Xwmc407	0
2A	Xwmc597	0
2A	Xgwm537	1.3
2A	IWA6922	3.4	wsnp_Ku_c33374_42877546
2A	IWA6745	3.4	wsnp_Ku_c23598_33524490
2A	IWA6481	3.4	wsnp_Ku_c13068_20937906
2A	IWA6391	3.4	wsnp_Ku_c10418_17237935
2A	IWA5423	3.4	wsnp_Ex_rep_c67619_66272209
2A	IWA5342	3.4	wsnp_Ex_rep_c66982_65424216
2A	IWA5341	3.4	wsnp_Ex_rep_c66982_65424063
2A	IWA5340	3.4	wsnp_Ex_rep_c66982_65423289
2A	IWA4990	3.4	wsnp_Ex_c997_1906952
2A	IWA3469	3.4	wsnp_Ex_c342_670415
2A	IWA3468	3.4	wsnp_Ex_c342_670243
2A	IWA3143	3.4	wsnp_Ex_c28133_37275403
2A	IWA2428	3.4	wsnp_Ex_c19516_28483751
2A	IWA2427	3.4	wsnp_Ex_c19516_28483050
2A	IWA2426	3.4	wsnp_Ex_c19516_28482852
2A	IWA2425	3.4	wsnp_Ex_c19516_28481857
2A	IWA2424	3.4	wsnp_Ex_c19516_28480964
2A	IWA1830	3.4	wsnp_Ex_c13945_21824927
2A	IWA1563	3.4	wsnp_Ex_c11950_19164191
2A	IWA1562	3.4	wsnp_Ex_c11950_19164041
2A	IWA1512	3.4	wsnp_Ex_c11560_18632777
2A	IWA1511	3.4	wsnp_Ex_c11560_18632698
2B	IWA7583	0	wsnp_Ra_c12275_19707323
2B	IWA7149	0	wsnp_Ku_c52392_57380726
2B	IWA6286	0	wsnp_JD_rep_c61500_39461849
2B	IWA5733	0	wsnp_Ex_rep_c71983_70544041
2B	Xwmc41	13.9
2B	IWA7840	16.8	wsnp_Ra_c3057_5773050
2B	IWA1083	16.8	wsnp_CAP7_c3635_1688824
2B	IWA8205	16.8	wsnp_Ra_rep_c77617_74362163
2B	IWA3742	16.9	wsnp_Ex_c40976_47910672
2B	IWA8153	17.2	wsnp_Ra_rep_c69210_66556925
2B	IWA8149	17.2	wsnp_Ra_rep_c112625_94438013
2B	IWA7839	17.2	wsnp_Ra_c3057_5773026
2B	IWA7055	17.2	wsnp_Ku_c4319_7848197
2B	IWA7054	17.2	wsnp_Ku_c4319_7847988
2B	IWA5919	17.2	wsnp_JD_c20871_18460063
2B	IWA5918	17.2	wsnp_JD_c20871_18460030
2B	IWA5630	17.2	wsnp_Ex_rep_c69692_68648376
2B	IWA5629	17.2	wsnp_Ex_rep_c69692_68647994
2B	IWA5628	17.2	wsnp_Ex_rep_c69692_68647924
2B	IWA5206	17.2	wsnp_Ex_rep_c66348_64527919
2B	IWA5205	17.2	wsnp_Ex_rep_c66348_64527084
2B	IWA2566	17.2	wsnp_Ex_c2100_3937914
2B	IWA1385	17.2	wsnp_Ex_c10751_17505459
2B	IWA839	17.2	wsnp_CAP11_rep_c4111_1943520
2B	IWA840	17.2	wsnp_CAP11_rep_c4111_1943544
2B	IWA6054	17.6	wsnp_JD_c43812_30492711
2B	IWA2514	17.6	wsnp_Ex_c20182_29230528
2B	IWA1707	17.6	wsnp_Ex_c12922_20472434
2B	IWA7615	17.6	wsnp_Ra_c13679_21569624
2B	IWA4367	18.5	wsnp_Ex_c5856_10276064
2B	IWA1708	19.1	wsnp_Ex_c12922_20473104
2B	IWA4294	19.1	wsnp_Ex_c5619_9884202
2B	IWA3741	19.5	wsnp_Ex_c40976_47910144
2B	IWA8195	19.5	wsnp_Ra_rep_c74497_72390803
2B	IWA6050	19.5	wsnp_JD_c4343_5462565
2B	IWA2253	34.4	wsnp_Ex_c17700_26446810
2B	IWA1489	37.4	wsnp_Ex_c114_230248
2B	IWA6317	37.4	wsnp_JD_rep_c67103_42432235
2B	IWA226	37.8	wsnp_BE490267A_Ta_2_1
2B	IWA8589	50.1	wsnp_RFL_Contig4402_5154408
2B	IWA571	50.9	wsnp_BG605258B_Ta_2_7
2B	IWA7112	55.3	wsnp_Ku_c48694_54811376
2B	IWA7113	55.3	wsnp_Ku_c48694_54811423
2B	IWA2343	58.2	wsnp_Ex_c18686_27560445
2B	IWA3714	58.7	wsnp_Ex_c4024_7278036
2B	IWA8406	59.7	wsnp_RFL_Contig2914_2757372
2B	IWA5810	61.1	wsnp_JD_c12346_12607102
2B	IWA5809	61.1	wsnp_JD_c12346_12606967
2B	IWA6778	61.1	wsnp_Ku_c2561_4878036
2B	Xwmc628	61.9
2B	Xwmc332	62.7
2B	IWA8449	63.9	wsnp_RFL_Contig3273_3319580
2B	IWA1822	63.9	wsnp_Ex_c13865_21720466
2B	IWA5460	63.9	wsnp_Ex_rep_c67838_66536117
2B	IWA3010	63.9	wsnp_Ex_c25943_35203857
2B	IWA1599	63.9	wsnp_Ex_c12223_19533198
2B	IWA2052	63.9	wsnp_Ex_c15681_24015996
2B	IWA8555	63.9	wsnp_RFL_Contig4076_4580964
2B	IWA3937	65.1	wsnp_Ex_c45468_51254832
2B	IWA3938	65.1	wsnp_Ex_c45468_51254978
2B	IWA5024	68	wsnp_Ex_rep_c101581_86924089
2B	IWA3233	68	wsnp_Ex_c29382_38422739
2B	IWA2459	68	wsnp_Ex_c19772_28771627
2B	IWA1765	68	wsnp_Ex_c13353_21046550
2B	IWA638	68	wsnp_BQ172173B_Ta_2_2
2B	IWA7955	68	wsnp_Ra_c4660_8405634
2B	IWA1293	71.7	wsnp_Ex_c1016_1943827
2B	IWA1292	71.7	wsnp_Ex_c1016_1943573
2B	IWA1291	71.7	wsnp_Ex_c1016_1943126
2B	IWA5051	71.7	wsnp_Ex_rep_c102127_87360034
2B	IWA7652	72	wsnp_Ra_c16333_24961476
2B	IWA4097	72.9	wsnp_Ex_c5123_9089025
2B	IWA4095	72.9	wsnp_Ex_c5123_9087869
2B	IWA3148	72.9	wsnp_Ex_c2819_5213149
2B	IWA2702	72.9	wsnp_Ex_c22271_31463467
2B	IWA2676	72.9	wsnp_Ex_c2203_4129271
2B	IWA2179	72.9	wsnp_Ex_c16948_25537916
2B	IWA4866	72.9	wsnp_Ex_c9025_15039930
2B	IWA5177	73.2	wsnp_Ex_rep_c110284_92725051
2B	IWA4909	73.2	wsnp_Ex_c942_1806632
2B	IWA4900	73.2	wsnp_Ex_c9345_15516291
2B	IWA4098	73.2	wsnp_Ex_c5123_9089624
2B	IWA4096	73.2	wsnp_Ex_c5123_9088111
2B	IWA2701	73.2	wsnp_Ex_c22271_31463382
2B	IWA2678	73.2	wsnp_Ex_c2203_4130096
2B	IWA2677	73.2	wsnp_Ex_c2203_4129457
2B	IWA2379	73.2	wsnp_Ex_c1915_3618286
2B	IWA2158	73.2	wsnp_Ex_c16627_25162803
2B	IWA7371	73.2	wsnp_Ku_c9901_16493072
2B	IWA8295	75.1	wsnp_RFL_Contig2123_1397739
2B	IWA6121	75.1	wsnp_JD_c6010_7167084
2B	IWA7620	75.1	wsnp_Ra_c13963_21949302
2B	IWA6122	76.7	wsnp_JD_c6010_7167159
2B	IWA8362	76.7	wsnp_RFL_Contig2612_2274356
2B	Xgwm47	82.1
2B	Xgwm3.2	82.4
2B	Xgwm133	82.4
2B	Xgwm130	82.4
2B	Xgwm60	82.4
2B	IWA933	88.2	wsnp_CAP12_c197_110707
2B	IWA7850	88.2	wsnp_Ra_c31353_40494768
2B	IWA5064	89	wsnp_Ex_rep_c102385_87568304
2B	IWA4357	89	wsnp_Ex_c58274_59638884
2B	IWA4356	89	wsnp_Ex_c58274_59638635
2B	IWA543	89	wsnp_BG274584B_Ta_2_1
2B	IWA4890	89	wsnp_Ex_c922_1775246
2B	IWA544	89	wsnp_BG274584B_Ta_2_3
2B	IWA4948	89	wsnp_Ex_c9628_15927045
2B	IWA3935	89.4	wsnp_Ex_c4542_8154800
2B	IWA4358	89.4	wsnp_Ex_c58274_59639258
2B	IWA1389	89.8	wsnp_Ex_c10796_17575074
2B	IWA6399	89.8	wsnp_Ku_c10564_17435459
2B	IWA2131	90.3	wsnp_Ex_c16425_24923837
2B	IWA2130	90.3	wsnp_Ex_c16425_24923685
2B	IWA2924	90.3	wsnp_Ex_c24711_33964543
2B	IWA5414	91.1	wsnp_Ex_rep_c67561_66189279
2B	IWA5413	91.1	wsnp_Ex_rep_c67561_66188180
2B	IWA2261	91.1	wsnp_Ex_c17845_26604587
2B	IWA469	91.1	wsnp_BF473744B_Ta_2_1
2B	IWA3973	92.5	wsnp_Ex_c46576_52042185
2B	IWA6047	93	wsnp_JD_c4243_5350869
2B	IWA6076	93	wsnp_JD_c47318_32176833
2B	Xwmc441	101.5
2B	Xbarc101	105.9
2B	IWA5512	108.9	wsnp_Ex_rep_c68194_66973114
2B	IWA5397	108.9	wsnp_Ex_rep_c67411_65994109
2B	IWA5513	108.9	wsnp_Ex_rep_c68194_66973531
2B	IWA4256	109.6	wsnp_Ex_c54998_57670603
2B	IWA2237	110	wsnp_Ex_c1758_3326792
2B	IWA2950	110	wsnp_Ex_c2510_4689918
2B	IWA6453	110.4	wsnp_Ku_c12037_19549078
2B	IWA4275	111.4	wsnp_Ex_c55735_58127324
2B	IWA4636	111.9	wsnp_Ex_c7203_12370983
2B	IWA2294	111.9	wsnp_Ex_c18261_27078080
2B	IWA5411	111.9	wsnp_Ex_rep_c67543_66165372
2B	IWA6875	122.4	wsnp_Ku_c3042_5706318
2B	IWA4983	122.4	wsnp_Ex_c9935_16358436
2B	IWA2885	122.4	wsnp_Ex_c24273_33514325
2B	IWA7951	122.4	wsnp_Ra_c46023_52004149
2B	IWA5464	123.6	wsnp_Ex_rep_c67865_66570323
2B	IWA6075	123.6	wsnp_JD_c4699_5834958
2B	IWA5290	123.8	wsnp_Ex_rep_c66700_65028839
2B	IWA6216	123.8	wsnp_JD_c9251_10121369
2B	IWA8112	124.5	wsnp_Ra_rep_c103071_87770006
2B	IWA7215	124.5	wsnp_Ku_c6183_10867720
2B	IWA4822	124.5	wsnp_Ex_c8641_14485630
2B	IWA3942	124.5	wsnp_Ex_c45595_51343969
2B	IWA2349	124.5	wsnp_Ex_c18750_27627600
2B	IWA671	124.5	wsnp_CAP11_c1436_808089
2B	IWA4915	125.2	wsnp_Ex_c944_1810245
2B	IWA4982	125.2	wsnp_Ex_c9932_16354389
2B	IWA4107	125.2	wsnp_Ex_c5172_9167324
2B	IWA4106	125.2	wsnp_Ex_c51661_55533018
2B	IWA6265	125.2	wsnp_JD_rep_c49813_33962513
2B	IWA5168	125.6	wsnp_Ex_rep_c108679_91802578
2B	IWA5256	125.6	wsnp_Ex_rep_c66524_64799410
2B	IWA2673	125.6	wsnp_Ex_c22018_31192778
2B	IWA6547	125.6	wsnp_Ku_c15057_23554067
2B	IWA6308	126.5	wsnp_JD_rep_c64505_41132927
2B	IWA5830	127.9	wsnp_JD_c13359_13373795
2B	IWA4472	127.9	wsnp_Ex_c62844_62315607
2B	IWA2674	127.9	wsnp_Ex_c22018_31193171
2B	IWA50	127.9	wsnp_BE404601B_Ta_2_1
2B	IWA6554	127.9	wsnp_Ku_c15336_23908130
2B	IWA3277	128.7	wsnp_Ex_c3044_5620102
2B	IWA6830	129.6	wsnp_Ku_c27759_37702654
2B	IWA6462	129.6	wsnp_Ku_c12517_20191465
2B	IWA6136	129.6	wsnp_JD_c6350_7517130
2B	IWA5038	129.6	wsnp_Ex_rep_c101906_87187119
2B	IWA4102	129.6	wsnp_Ex_c51661_55531646
2B	IWA3428	129.6	wsnp_Ex_c33246_41764093
2B	IWA1087	129.6	wsnp_BE442776A_Ta_2_1
2B	IWA7263	129.6	wsnp_Ku_c7096_12264232
2B	IWA5811	131	wsnp_JD_c1236_1789566
2B	IWA1912	131	wsnp_Ex_c1459_2797709
2B	IWA6135	131	wsnp_JD_c6436_7600132
2B	IWA3621	131.5	wsnp_Ex_c3764_6853627
2B	IWA6664	132.5	wsnp_Ku_c18923_28319203
2B	IWA3622	132.5	wsnp_Ex_c3769_6861195
2B	IWA6818	132.5	wsnp_Ku_c2725_5163091
2B	IWA4984	133.3	wsnp_Ex_c9935_16358536
2B	IWA2977	133.3	wsnp_Ex_c2557_4761174
2B	IWA5149	133.3	wsnp_Ex_rep_c106085_90293854
2B	IWA6819	134.5	wsnp_Ku_c2725_5163093
2B	IWA3213	135	wsnp_Ex_c29108_38173309
2B	IWA6781	135	wsnp_Ku_c2562_4879681
2B	IWA1914	140.2	wsnp_Ex_c14595_22634031
2B	IWA3924	140.9	wsnp_Ex_c45094_50985067
2B	IWA4894	140.9	wsnp_Ex_c9248_15372536
2B	IWA10	141.3	wsnp_BE399688B_Ta_2_1
2B	IWA6509	143.5	wsnp_Ku_c13905_22034406
2B	IWA3127	143.5	wsnp_Ex_c27867_37030045
2B	IWA3126	143.5	wsnp_Ex_c27867_37030229
2B	IWA1763	143.5	wsnp_Ex_c13351_21042379
2B	IWA7661	143.5	wsnp_Ra_c16822_25566950
2B	IWA6427	143.6	wsnp_Ku_c11665_18999583
2B	IWA5377	143.6	wsnp_Ex_rep_c67257_65786614
2B	IWA2671	143.6	wsnp_Ex_c22010_31185837
2B	IWA328	143.6	wsnp_BE499478B_Ta_2_1
2B	IWA3278	143.6	wsnp_Ex_c30447_39360584
2B	IWA5240	143.8	wsnp_Ex_rep_c66448_64683704
2B	IWA1204	143.8	wsnp_CAP8_c630_456418
2B	IWA7076	143.8	wsnp_Ku_c4507_8157580
2B	IWA4323	145.7	wsnp_Ex_c57_116914
2B	IWA7029	146.8	wsnp_Ku_c4042_7375053
2B	IWA5916	146.8	wsnp_JD_c20720_18369335
2B	IWA5560	146.8	wsnp_Ex_rep_c68704_67559626
2B	IWA4655	146.8	wsnp_Ex_c7324_12561727
2B	IWA4532	146.8	wsnp_Ex_c6537_11339130
2B	IWA4531	146.8	wsnp_Ex_c6537_11338763
2B	IWA4456	146.8	wsnp_Ex_c62404_62055681
2B	IWA3824	146.8	wsnp_Ex_c42316_48926687
2B	IWA3564	146.8	wsnp_Ex_c3614_6602465
2B	IWA3329	146.8	wsnp_Ex_c31274_40086873
2B	IWA3081	146.8	wsnp_Ex_c269_518324
2B	IWA3080	146.8	wsnp_Ex_c269_517710
2B	IWA2887	146.8	wsnp_Ex_c2430_4546479
2B	IWA2557	146.8	wsnp_Ex_c20786_29875033
2B	IWA2556	146.8	wsnp_Ex_c20786_29874875
2B	IWA2312	146.8	wsnp_Ex_c18418_27251563
2B	IWA1665	146.8	wsnp_Ex_c12671_20140295
2B	IWA1664	146.8	wsnp_Ex_c12671_20140014
2B	IWA1114	146.8	wsnp_CAP7_rep_c12606_5316797
2B	IWA763	146.8	wsnp_CAP11_c3947_1867089
2B	IWA762	146.8	wsnp_CAP11_c3947_1866837
2B	IWA608	146.8	wsnp_BM140364B_Ta_2_3
2B	IWA607	146.8	wsnp_BM140364B_Ta_2_1
2B	IWA295	146.8	wsnp_BE497494B_Ta_2_1
2B	IWA8182	146.8	wsnp_Ra_rep_c71728_69843225
2B	IWA5753	147.2	wsnp_Ex_rep_c81490_76243612
2B	IWA6364	148.7	wsnp_JG_c609_370792
2B	IWA8381	149.5	wsnp_RFL_Contig2744_2471775
2B	IWA5818	150.7	wsnp_JD_c12687_12877994
2B	IWA6070	150.7	wsnp_JD_c4621_5757201
2B	IWA5392	150.7	wsnp_Ex_rep_c67391_65971023
2B	IWA4673	150.7	wsnp_Ex_c741_1456698
2B	IWA4135	150.7	wsnp_Ex_c5239_9272511
2B	IWA3328	150.7	wsnp_Ex_c31262_40077397
2B	IWA6069	150.7	wsnp_JD_c4621_5757093
2B	Xgwm148	152.5
2B	IWA6740	155.9	wsnp_Ku_c23305_33210841
2B	IWA8083	157.2	wsnp_Ra_c8489_14382125
2B	IWA7069	157.2	wsnp_Ku_c44441_51721669
2B	IWA6739	157.2	wsnp_Ku_c23305_33210628
2B	IWA4652	157.2	wsnp_Ex_c7285_12506938
2B	IWA4554	157.2	wsnp_Ex_c66052_64232430
2B	IWA4421	157.2	wsnp_Ex_c6099_10674508
2B	IWA4420	157.2	wsnp_Ex_c6099_10674406
2B	IWA2571	167.7	wsnp_Ex_c21092_30220342
2B	IWA2572	167.7	wsnp_Ex_c21092_30220702
2B	IWA1093	168	wsnp_CAP7_c4904_2198084
2B	IWA2391	171.5	wsnp_Ex_c19260_28187434
2B	IWA6474	172.6	wsnp_Ku_c12721_20478606
2B	IWA1359	172.6	wsnp_Ex_c10596_17293192
2B	IWA1360	173.3	wsnp_Ex_c10596_17293363
2B	IWA7916	173.6	wsnp_Ra_c407_862316
2B	IWA1930	176.1	wsnp_Ex_c14711_22788586
2B	IWA3838	176.1	wsnp_Ex_c4272_7708423
2B	IWA5708	177.8	wsnp_Ex_rep_c70756_69644826
2B	IWA6085	178.2	wsnp_JD_c5064_6183978
2B	IWA6048	178.2	wsnp_JD_c42879_30043973
2B	IWA5410	178.2	wsnp_Ex_rep_c67542_66164609
2B	IWA6184	178.2	wsnp_JD_c8085_9129899
2B	IWA4284	179.6	wsnp_Ex_c56027_58306755
2B	IWA4285	179.6	wsnp_Ex_c56027_58308093
2B	IWA2117	180.8	wsnp_Ex_c163_321026
2B	IWA2116	180.8	wsnp_Ex_c163_320858
2B	IWA2115	180.8	wsnp_Ex_c163_320267
2B	IWA1929	180.8	wsnp_Ex_c14711_22788263
2B	IWA7800	180.8	wsnp_Ra_c26744_36299151
2B	IWA8124	193.3	wsnp_Ra_rep_c106119_89961852
2B	IWA3723	193.3	wsnp_Ex_c40567_47599129
2B	IWA8152	193.7	wsnp_Ra_rep_c117300_96881829
2B	IWA2973	213.4	wsnp_Ex_c25445_34710489
2B	IWA3407	215.5	wsnp_Ex_c326_636368
2B	IWA7656	215.9	wsnp_Ra_c1660_3275687
2B	IWA4808	215.9	wsnp_Ex_c851_1654297
2B	IWA4724	215.9	wsnp_Ex_c7776_13247654
2B	IWA4723	215.9	wsnp_Ex_c7776_13247365
2B	IWA2482	215.9	wsnp_Ex_c1996_3754394
2B	IWA6138	216.3	wsnp_JD_c640_960796
2B	IWA4953	221.1	wsnp_Ex_c9706_16040258
2B	IWA6263	223.2	wsnp_JD_rep_c49438_33652663
2B	IWA4963	244.7	wsnp_Ex_c979_1874338
2B	IWA6852	245.8	wsnp_Ku_c28820_38731137
2B	IWA5991	245.8	wsnp_JD_c30_49876
2B	IWA5990	245.8	wsnp_JD_c30_49149
2B	IWA5989	245.8	wsnp_JD_c30_49073
2B	IWA5694	245.8	wsnp_Ex_rep_c70525_69448648
2B	IWA7122	245.8	wsnp_Ku_c498_1036380
2B	IWA4665	259.2	wsnp_Ex_c7366_12631059
2B	IWA2779	259.2	wsnp_Ex_c2311_4328167
2B	Xwmc369.3	0
2B	Xwmc361	2.3
2B	Xwmc149	3.5
2B	IWA1535	9	wsnp_Ex_c11758_18896434
2B	IWA6656	9	wsnp_Ku_c18587_27915541
2B	IWA5442	16.5	wsnp_Ex_rep_c67697_66363222
2B	IWA6943	0	wsnp_Ku_c34759_44069854
2B	IWA6893	0	wsnp_Ku_c31_62657
2B	IWA6026	0	wsnp_JD_c3732_4781170
2B	Xgwm429	3.1
2D	IWA7370	0	wsnp_Ku_c9883_16462146
2D	IWA3605	3.4	wsnp_Ex_c3740_6815132
2D	IWA5772	3.7	wsnp_JD_c10389_11059599
2D	IWA1799	4.1	wsnp_Ex_c13686_21480826
2D	IWA1601	4.4	wsnp_Ex_c12250_19568265
2D	IWA5385	5.3	wsnp_Ex_rep_c67320_65870601
2D	IWA4354	5.7	wsnp_Ex_c58019_59494143
2D	IWA1107	5.7	wsnp_CAP7_c888_455397
2D	IWA965	5.7	wsnp_CAP12_c455_248396
2D	IWA5344	5.7	wsnp_Ex_rep_c67011_65463819
2D	IWA6156	6.6	wsnp_JD_c69_109951
2D	IWA2846	8.1	wsnp_Ex_c2388_4476302
2D	IWA7936	8.1	wsnp_Ra_c4321_7860456
2D	IWA2407	8.8	wsnp_Ex_c19371_28311667
2D	Xgwm455	10.1
2D	IWA6768	11.7	wsnp_Ku_c2486_4751761
2D	IWA8430	11.7	wsnp_RFL_Contig3118_3061389
2D	IWA6767	12.1	wsnp_Ku_c2486_4751695
2D	IWA8293	53.2	wsnp_RFL_Contig2104_1368653
2D	IWA3849	53.2	wsnp_Ex_c42970_49408712
2D	IWA2711	53.2	wsnp_Ex_c2240_4197532
2D	IWA553	53.2	wsnp_BG313738D_Ta_2_1
2D	IWA230	53.2	wsnp_BE490384D_Ta_1_2
2D	IWA229	53.2	wsnp_BE490384D_Ta_1_1
2D	IWA4108	53.6	wsnp_Ex_c5177_9174930
2D	IWA3976	53.6	wsnp_Ex_c46666_52102968
2D	IWA7629	53.6	wsnp_Ra_c146_314838
2D	IWA3848	54.4	wsnp_Ex_c42970_49408553
2D	IWA1440	55.2	wsnp_Ex_c11127_18033163
2D	IWA2415	0	wsnp_Ex_c1944_3664205
2D	IWA1975	0	wsnp_Ex_c15048_23219416
2D	IWA2414	2.3	wsnp_Ex_c1944_3663988
2D	IWA6452	2.8	wsnp_Ku_c12022_19520410
2D	IWA7418	2.8	wsnp_Ku_rep_c105822_91859983
2D	IWA7273	2.8	wsnp_Ku_c7229_12491877
2D	IWA6374	2.8	wsnp_Ku_c1016_2065367
2D	IWA609	2.8	wsnp_BM140538D_Ta_2_1
2D	IWA7435	3.3	wsnp_Ku_rep_c68228_67133195
2D	IWA3248	4.3	wsnp_Ex_c29666_38670435
2D	IWA563	4.9	wsnp_BG314532D_Ta_1_1
2D	IWA209	7.8	wsnp_BE488779D_Ta_1_2
2D	Xgwm102.2	7.8
2D	IWA5674	0	wsnp_Ex_rep_c70132_69082297
2D	IWA5673	0	wsnp_Ex_rep_c70132_69082249
2D	IWA2053	0	wsnp_Ex_c15681_24016359
2D	IWA1821	0	wsnp_Ex_c13865_21720307
2D	IWA96	0	wsnp_BE426620D_Ta_2_2
2D	IWA7762	0	wsnp_Ra_c22648_32132929
2D	IWA2792	0.3	wsnp_Ex_c23239_32477458
2D	IWA2631	0.6	wsnp_Ex_c21593_30744815
2D	IWA7348	0.6	wsnp_Ku_c9269_15583444
2D	IWA8365	1.3	wsnp_RFL_Contig2659_2346243
2D	IWA4789	0	wsnp_Ex_c8303_14001708
2D	IWA7332	2.7	wsnp_Ku_c8712_14751858
2D	IWA5637	13	wsnp_Ex_rep_c69782_68740893
2D	IWA8562	13.4	wsnp_RFL_Contig4134_4692458
2D	IWA2961	13.8	wsnp_Ex_c25311_34578436
2D	IWA2722	16.4	wsnp_Ex_c2251_4218338
2D	IWA4746	59.7	wsnp_Ex_c7908_13430703
2D	IWA6302	65.2	wsnp_JD_rep_c63957_40798121
2D	IWA1939	65.2	wsnp_Ex_c14779_22892053
3A	Xgwm480	0
3A	Xcfa2076.2	0.4
3A	IWA391	3.4	wsnp_BE604885A_Ta_2_2
3A	IWA390	3.4	wsnp_BE604885A_Ta_2_1
3A	IWA7297	12.8	wsnp_Ku_c7811_13387117
3A	IWA2372	12.8	wsnp_Ex_c1903_3592518
3A	IWA6395	28.6	wsnp_Ku_c10468_17301042
3A	IWA6396	29	wsnp_Ku_c10468_17301216
3A	IWA2008	44.1	wsnp_Ex_c1533_2930233
3A	IWA2029	46.6	wsnp_Ex_c15475_23757972
3A	IWA2028	46.8	wsnp_Ex_c15475_23756906
3A	IWA926	46.8	wsnp_CAP12_c15_9559
3A	IWA799	46.8	wsnp_CAP11_c68_106078
3A	IWA524	46.8	wsnp_BG262734A_Ta_2_7
3A	IWA523	46.8	wsnp_BG262734A_Ta_2_3
3A	IWA1612	47.5	wsnp_Ex_c12341_19693570
3A	IWA1611	47.5	wsnp_Ex_c12341_19693090
3A	IWA855	47.5	wsnp_CAP11_rep_c4226_1995152
3A	IWA3111	47.5	wsnp_Ex_c27317_36522052
3A	IWA5982	51.1	wsnp_JD_c29019_23208279
3A	IWA5981	51.1	wsnp_JD_c29019_23208158
3A	IWA5980	51.1	wsnp_JD_c29019_23208078
3A	IWA5213	51.1	wsnp_Ex_rep_c66357_64540428
3A	IWA5212	51.1	wsnp_Ex_rep_c66357_64540369
3A	IWA2362	51.1	wsnp_Ex_c1894_3575749
3A	IWA616	51.1	wsnp_BQ160970A_Ta_2_7
3A	IWA7602	51.1	wsnp_Ra_c132_291198
3A	IWA623	54.2	wsnp_BQ167580A_Ta_1_1
3A	IWA4810	54.9	wsnp_Ex_c8517_14315660
3A	IWA5456	55.2	wsnp_Ex_rep_c67786_66472676
3A	IWA445	55.8	wsnp_BF292596A_Ta_1_3
3A	IWA444	55.8	wsnp_BF292596A_Ta_1_1
3A	IWA7087	56.4	wsnp_Ku_c458_954940
3A	IWA4298	69.4	wsnp_Ex_c5623_9891584
3A	IWA4296	69.4	wsnp_Ex_c5623_9891427
3A	IWA7712	78.8	wsnp_Ra_c19979_29215858
3A	IWA4451	78.8	wsnp_Ex_c6217_10848574
3A	IWA2519	78.8	wsnp_Ex_c20273_29326769
3A	IWA335	78.8	wsnp_BE500759A_Td_2_1
3A	IWA177	78.8	wsnp_BE445496A_Ta_2_1
3A	IWA8162	82.5	wsnp_Ra_rep_c69692_67234463
3A	IWA8374	84.4	wsnp_RFL_Contig2699_2402527
3A	IWA1831	90.7	wsnp_Ex_c13949_21828493
3A	IWA7319	91.6	wsnp_Ku_c8334_14181247
3A	IWA3376	91.9	wsnp_Ex_c32003_40728918
3A	IWA2886	92.2	wsnp_Ex_c24293_33532428
3A	IWA4923	92.2	wsnp_Ex_c9468_15697512
3A	IWA2618	92.2	wsnp_Ex_c2148_4035913
3A	IWA2617	92.2	wsnp_Ex_c2148_4035900
3A	IWA8630	92.2	wsnp_RFL_Contig4814_5829093
3A	IWA7114	92.5	wsnp_Ku_c4886_8753646
3A	IWA6783	92.5	wsnp_Ku_c25809_35776454
3A	IWA6170	92.5	wsnp_JD_c7441_8535047
3A	IWA3836	92.5	wsnp_Ex_c42698_49211728
3A	IWA2750	92.5	wsnp_Ex_c22766_31972755
3A	IWA2748	92.5	wsnp_Ex_c22766_31972202
3A	IWA73	92.5	wsnp_BE406587A_Ta_2_1
3A	IWA5285	93.5	wsnp_Ex_rep_c66685_65003254
3A	IWA5314	93.8	wsnp_Ex_rep_c66865_65263145
3A	IWA5313	93.8	wsnp_Ex_rep_c66865_65262892
3A	IWA5315	93.8	wsnp_Ex_rep_c66865_65264070
3A	IWA6914	94.4	wsnp_Ku_c3286_6111360
3A	IWA3771	94.4	wsnp_Ex_c41283_48140956
3A	IWA1605	94.4	wsnp_Ex_c12269_19597415
3A	IWA7441	94.4	wsnp_Ku_rep_c68484_67500021
3A	IWA237	95.7	wsnp_BE490744A_Td_2_1
3A	IWA8621	97	wsnp_RFL_Contig4734_5671036
3A	IWA7970	97	wsnp_Ra_c4858_8709000
3A	IWA7891	97	wsnp_Ra_c35889_44345459
3A	IWA7817	97	wsnp_Ra_c27831_37346894
3A	IWA6913	97	wsnp_Ku_c3286_6111264
3A	IWA6907	97	wsnp_Ku_c32404_42016343
3A	IWA5579	97	wsnp_Ex_rep_c69034_67935465
3A	IWA5578	97	wsnp_Ex_rep_c69034_67934852
3A	IWA4794	97	wsnp_Ex_c8334_14049699
3A	IWA4707	97	wsnp_Ex_c763_1503467
3A	IWA4110	97	wsnp_Ex_c51776_55603135
3A	IWA4001	97	wsnp_Ex_c47907_52974924
3A	IWA3999	97	wsnp_Ex_c47763_52874806
3A	IWA3772	97	wsnp_Ex_c41283_48141201
3A	IWA3600	97	wsnp_Ex_c37208_45002588
3A	IWA3512	97	wsnp_Ex_c35073_43285821
3A	IWA3250	97	wsnp_Ex_c29742_38738725
3A	IWA2986	97	wsnp_Ex_c25668_34932304
3A	IWA2925	97	wsnp_Ex_c24731_33983680
3A	IWA1982	97	wsnp_Ex_c15100_23284023
3A	IWA1701	97	wsnp_Ex_c12871_20402160
3A	IWA1700	97	wsnp_Ex_c12871_20400823
3A	IWA1604	97	wsnp_Ex_c12269_19597341
3A	IWA1536	97	wsnp_Ex_c11807_18960045
3A	IWA1507	97	wsnp_Ex_c1149_2206471
3A	IWA7564	97	wsnp_Ra_c11291_18338838
3A	IWA1762	97.3	wsnp_Ex_c1335_2556442
3A	IWA7150	97.3	wsnp_Ku_c5243_9344536
3A	IWA1984	97.5	wsnp_Ex_c15100_23284662
3A	IWA7440	97.5	wsnp_Ku_rep_c68484_67499824
3A	IWA4930	97.5	wsnp_Ex_c9510_15761235
3A	IWA1983	97.5	wsnp_Ex_c15100_23284292
3A	IWA7350	97.5	wsnp_Ku_c9316_15647115
3A	IWA5994	97.6	wsnp_JD_c3034_4017676
3A	IWA4025	97.6	wsnp_Ex_c48455_53355009
3A	IWA2332	97.6	wsnp_Ex_c18637_27508578
3A	IWA236	97.6	wsnp_BE490651A_Ta_2_2
3A	IWA7541	97.6	wsnp_Ra_c10669_17515792
3A	IWA5311	97.9	wsnp_Ex_rep_c66865_65262277
3A	IWA5312	97.9	wsnp_Ex_rep_c66865_65262612
3A	IWA2987	98.1	wsnp_Ex_c25668_34932560
3A	IWA8558	98.1	wsnp_RFL_Contig4082_4591766
3A	IWA248	99.9	wsnp_BE494474A_Ta_2_1
3A	IWA5124	99.9	wsnp_Ex_rep_c104884_89459472
3A	IWA5332	99.9	wsnp_Ex_rep_c66907_65324299
3A	IWA2154	102.4	wsnp_Ex_c1660_3159173
3A	IWA2023	102.7	wsnp_Ex_c15400_23664328
3A	IWA2153	102.7	wsnp_Ex_c1660_3158776
3A	IWA1887	103	wsnp_Ex_c14340_22315611
3A	IWA8580	103	wsnp_RFL_Contig429_4978628
3A	IWA7011	103.9	wsnp_Ku_c3956_7237642
3A	IWA3070	103.9	wsnp_Ex_c2678_4968496
3A	IWA3069	103.9	wsnp_Ex_c2678_4968284
3A	IWA1487	103.9	wsnp_Ex_c11397_18400400
3A	IWA7387	103.9	wsnp_Ku_rep_c102095_89140978
3A	IWA8388	104.2	wsnp_RFL_Contig2767_2518373
3A	IWA7415	104.2	wsnp_Ku_rep_c104691_91086871
3A	IWA7036	104.2	wsnp_Ku_c40984_49074215
3A	IWA7012	104.2	wsnp_Ku_c3956_7237707
3A	IWA7010	104.2	wsnp_Ku_c3956_7237468
3A	IWA6923	104.2	wsnp_Ku_c3343_6206887
3A	IWA6483	104.2	wsnp_Ku_c1307_2606226
3A	IWA6256	104.2	wsnp_JD_rep_c49174_33405622
3A	IWA5164	104.2	wsnp_Ex_rep_c108072_91444417
3A	IWA4397	104.2	wsnp_Ex_c5997_10512308
3A	IWA3071	104.2	wsnp_Ex_c2678_4969725
3A	IWA462	104.2	wsnp_BF429272A_Ta_2_1
3A	IWA8405	104.2	wsnp_RFL_Contig2913_2755542
3A	IWA2156	104.5	wsnp_Ex_c16615_25147492
3A	IWA5617	104.5	wsnp_Ex_rep_c69577_68526990
3A	IWA8468	104.6	wsnp_RFL_Contig3404_3532568
3A	IWA8283	104.8	wsnp_RFL_Contig2011_1216801
3A	IWA7941	104.8	wsnp_Ra_c44141_50623811
3A	IWA6108	104.8	wsnp_JD_c5699_6859527
3A	IWA5786	104.8	wsnp_JD_c1187_1731186
3A	IWA5782	104.8	wsnp_JD_c11273_11770307
3A	IWA5005	104.8	wsnp_Ex_rep_c101340_86719115
3A	IWA5006	104.8	wsnp_Ex_rep_c101340_86719239
3A	IWA4913	104.8	wsnp_Ex_c943_1808577
3A	IWA4912	104.8	wsnp_Ex_c943_1808232
3A	IWA4172	104.8	wsnp_Ex_c53364_56625806
3A	IWA3156	104.8	wsnp_Ex_c28310_37444843
3A	IWA1922	104.8	wsnp_Ex_c14681_22747500
3A	IWA1422	104.8	wsnp_Ex_c11039_17902115
3A	IWA143	104.8	wsnp_BE443995B_Ta_2_2
3A	IWA8577	104.8	wsnp_RFL_Contig4273_4946890
3A	IWA3498	105.1	wsnp_Ex_c3478_6369892
3A	IWA1614	105.1	wsnp_Ex_c12354_19711297
3A	IWA3936	105.1	wsnp_Ex_c45438_51235587
3A	IWA5849	107.3	wsnp_JD_c14691_14352459
3A	IWA2944	107.3	wsnp_Ex_c2502_4675968
3A	IWA5298	108.1	wsnp_Ex_rep_c66763_65120251
3A	IWA7454	108.4	wsnp_Ku_rep_c69511_68887456
3A	IWA7064	108.4	wsnp_Ku_c44089_51445136
3A	IWA5763	108.4	wsnp_Ex_rep_c95365_83402134
3A	IWA8526	108.4	wsnp_RFL_Contig3866_4228783
3A	IWA90	109.3	wsnp_BE426222A_Ta_2_1
3A	IWA5444	109.3	wsnp_Ex_rep_c67727_66398596
3A	IWA6187	110	wsnp_JD_c8207_9234643
3A	IWA5316	110	wsnp_Ex_rep_c66867_65267909
3A	IWA2316	110	wsnp_Ex_c1848_3482919
3A	IWA8215	114.8	wsnp_Ra_rep_c99053_85689574
3A	IWA1972	116.1	wsnp_Ex_c15036_23203474
3A	IWA443	116.7	wsnp_BF292295A_Ta_2_1
3A	IWA1308	120.1	wsnp_Ex_c10272_16842803
3A	IWA4138	121.6	wsnp_Ex_c52423_56025523
3A	IWA7245	124	wsnp_Ku_c6772_11776285
3A	IWA5616	124	wsnp_Ex_rep_c69567_68516173
3A	IWA5387	124	wsnp_Ex_rep_c67349_65914945
3A	IWA6877	124	wsnp_Ku_c30545_40369365
3A	IWA2095	124	wsnp_Ex_c16079_24507688
3A	IWA2069	124	wsnp_Ex_c15848_24235835
3A	IWA1426	124	wsnp_Ex_c11048_17916681
3A	IWA7928	124	wsnp_Ra_c42478_49433787
3A	IWA5643	124.4	wsnp_Ex_rep_c69816_68774959
3A	IWA3448	124.4	wsnp_Ex_c33765_42199371
3A	IWA720	124.5	wsnp_CAP11_c2438_1258747
3A	IWA6229	124.5	wsnp_JD_c9434_10274598
3A	IWA6306	124.5	wsnp_JD_rep_c64325_41024646
3A	IWA5641	124.7	wsnp_Ex_rep_c69816_68774416
3A	IWA5642	125	wsnp_Ex_rep_c69816_68774932
3A	IWA1490	128.4	wsnp_Ex_c1141_2191485
3A	IWA3739	129	wsnp_Ex_c4094_7399975
3A	IWA7649	129.4	wsnp_Ra_c16278_24893033
3A	IWA2898	129.4	wsnp_Ex_c24432_33676448
3A	IWA7022	129.4	wsnp_Ku_c40218_48484410
3A	IWA5067	129.9	wsnp_Ex_rep_c102478_87635370
3A	IWA4334	130.9	wsnp_Ex_c57322_59084809
3A	IWA4333	130.9	wsnp_Ex_c57322_59083238
3A	IWA7552	130.9	wsnp_Ra_c10911_17834481
3A	IWA4675	131.9	wsnp_Ex_c742_1458033
3A	IWA6413	131.9	wsnp_Ku_c11052_18135847
3A	IWA4676	132.4	wsnp_Ex_c742_1458743
3A	IWA4335	133	wsnp_Ex_c57322_59084950
3A	Xgwm2	135.5
3A	IWA8099	0	wsnp_Ra_c9185_15386027
3A	IWA8164	0.8	wsnp_Ra_rep_c69820_67401482
3A	IWA4725	0.8	wsnp_Ex_c7780_13254349
3A	IWA2908	0.8	wsnp_Ex_c24548_33795073
3A	IWA8004	0.8	wsnp_Ra_c5532_9788185
3A	Xbarc57	27.5
3A	Xgwm157	29.5
3A	Xwmc11.3	32.7
3A	IWA6038	41.5	wsnp_JD_c396_603720
3A	IWA6092	41.5	wsnp_JD_c5170_6293946
3A	IWA6528	48.3	wsnp_Ku_c14409_22721765
3A	IWA2174	48.3	wsnp_Ex_c16864_25440739
3A	IWA8100	48.3	wsnp_Ra_c9185_15386081
3A	IWA4581	49.8	wsnp_Ex_c6833_11782875
3A	IWA8062	52.2	wsnp_Ra_c741_1529103
3A	IWA7861	52.2	wsnp_Ra_c32168_41215276
3A	IWA4066	52.2	wsnp_Ex_c50074_54480272
3A	IWA2738	52.2	wsnp_Ex_c22683_31887799
3A	IWA2737	52.2	wsnp_Ex_c22683_31887736
3A	IWA8280	52.2	wsnp_RFL_Contig1999_1190396
3A	IWA5429	57.5	wsnp_Ex_rep_c67635_66292308
3A	IWA6977	57.5	wsnp_Ku_c3817_7009270
3A	IWA5427	61.1	wsnp_Ex_rep_c67635_66291944
3A	IWA4582	61.1	wsnp_Ex_c6833_11783076
3A	IWA1269	61.1	wsnp_Ex_c10014_16476905
3A	IWA447	61.1	wsnp_BF293133A_Ta_2_2
3A	IWA6976	61.1	wsnp_Ku_c3817_7009093
3A	IWA3894	61.1	wsnp_Ex_c44375_50444756
3A	IWA5430	61.1	wsnp_Ex_rep_c67635_66292689
3A	IWA7771	61.8	wsnp_Ra_c2339_4506620
3A	IWA2993	63.5	wsnp_Ex_c2573_4788116
3A	IWA8127	69.1	wsnp_Ra_rep_c106523_90273922
3A	IWA851	70.2	wsnp_CAP11_rep_c4157_1965583
3A	IWA8106	74.2	wsnp_Ra_c9738_16174002
3A	IWA8105	74.2	wsnp_Ra_c9738_16173810
3A	IWA3939	74.2	wsnp_Ex_c4548_8166555
3A	IWA4804	75.6	wsnp_Ex_c8409_14170476
3A	IWA4781	76.1	wsnp_Ex_c8240_13914674
3A	IWA4257	76.1	wsnp_Ex_c55051_57706127
3A	IWA5050	76.1	wsnp_Ex_rep_c102110_87348288
3A	IWA5969	77.8	wsnp_JD_c2722_3653988
3A	Xwmc532	80.6
3A	IWA341	0	wsnp_BE517780B_Ta_1_1
3A	IWA7938	2.5	wsnp_Ra_c4373_7946257
3A	IWA1367	3.2	wsnp_Ex_c10630_17338753
3A	IWA1366	3.2	wsnp_Ex_c10630_17338703
3A	IWA7812	3.2	wsnp_Ra_c27517_37034553
3A	IWA891	7.5	wsnp_CAP11_rep_c8581_3702222
3A	IWA4850	18.8	wsnp_Ex_c88767_80001420
3A	IWA3178	18.8	wsnp_Ex_c28679_37784954
3A	IWA1457	18.8	wsnp_Ex_c11229_18163892
3A	IWA7158	18.8	wsnp_Ku_c5359_9531713
3A	IWA7157	20.2	wsnp_Ku_c5359_9530161
3A	IWA3177	20.2	wsnp_Ex_c28679_37784735
3A	IWA602	20.2	wsnp_BM137927A_Ta_2_1
3A	IWA8038	21.3	wsnp_Ra_c66411_64796843
3A	IWA3031	23.5	wsnp_Ex_c26213_35462685
3A	IWA7999	24.9	wsnp_Ra_c5454_9660102
3A	IWA6716	24.9	wsnp_Ku_c217_430915
3A	IWA2397	24.9	wsnp_Ex_c19309_28243712
3A	IWA2396	24.9	wsnp_Ex_c19309_28242774
3A	IWA8000	24.9	wsnp_Ra_c5454_9660204
3A	IWA5190	26.2	wsnp_Ex_rep_c66274_64426834
3A	IWA5191	26.6	wsnp_Ex_rep_c66274_64426901
3B	Xgwm247	0
3B	Xgwm340	0.4
3B	IWA1756	5.9	wsnp_Ex_c13284_20948460
3B	IWA2148	6.2	wsnp_Ex_c16569_25082817
3B	IWA3951	7.4	wsnp_Ex_c45877_51548342
3B	IWA2147	10.1	wsnp_Ex_c16569_25082760
3B	IWA4311	21.1	wsnp_Ex_c56591_58653386
3B	IWA4312	21.6	wsnp_Ex_c56591_58653455
3B	IWA6930	26	wsnp_Ku_c3371_6259457
3B	IWA8628	36.9	wsnp_RFL_Contig4792_5787180
3B	IWA3454	36.9	wsnp_Ex_c33879_42293206
3B	IWA787	36.9	wsnp_CAP11_c59_99769
3B	IWA785	36.9	wsnp_CAP11_c59_99317
3B	IWA784	36.9	wsnp_CAP11_c59_99263
3B	IWA786	37.6	wsnp_CAP11_c59_99702
3B	IWA8058	38.9	wsnp_Ra_c7158_12394405
3B	IWA5594	39.3	wsnp_Ex_rep_c69287_68216012
3B	IWA1094	56.8	wsnp_CAP7_c5097_2266314
3B	IWA8043	58.9	wsnp_Ra_c67016_65144188
3B	IWA1745	63.8	wsnp_Ex_c13217_20858600
3B	IWA1744	64.9	wsnp_Ex_c13217_20858366
3B	IWA4778	83.8	wsnp_Ex_c8208_13870372
3B	IWA4324	83.8	wsnp_Ex_c57094_58953404
3B	IWA6056	83.8	wsnp_JD_c4413_5541190
3B	IWA5015	84.5	wsnp_Ex_rep_c101457_86818160
3B	IWA5014	84.5	wsnp_Ex_rep_c101457_86818055
3B	IWA5013	84.5	wsnp_Ex_rep_c101457_86817938
3B	IWA5016	84.5	wsnp_Ex_rep_c101457_86818610
3B	IWA3330	87.9	wsnp_Ex_c3130_5789791
3B	Xwmc291	91
3B	IWA298	94.6	wsnp_BE497740B_Ta_2_1
3B	IWA299	94.6	wsnp_BE497740B_Ta_2_2
3B	IWA6002	95.7	wsnp_JD_c3183_4178470
3B	IWA5510	97	wsnp_Ex_rep_c68193_66971396
3B	IWA5511	97	wsnp_Ex_rep_c68193_66971472
3B	IWA5432	97.6	wsnp_Ex_rep_c67645_66305241
3B	IWA4497	97.6	wsnp_Ex_c64005_62986957
3B	IWA1733	97.6	wsnp_Ex_c13154_20785032
3B	IWA1732	97.6	wsnp_Ex_c13154_20784674
3B	IWA1731	97.6	wsnp_Ex_c13154_20784321
3B	IWA6856	97.6	wsnp_Ku_c29102_39008953
3B	IWA7561	98.9	wsnp_Ra_c11243_18269800
3B	IWA3669	98.9	wsnp_Ex_c39124_46489956
3B	IWA3273	98.9	wsnp_Ex_c3040_5615597
3B	IWA1974	98.9	wsnp_Ex_c15047_23217632
3B	IWA1682	98.9	wsnp_Ex_c12781_20280445
3B	IWA1541	98.9	wsnp_Ex_c11837_18996495
3B	IWA125	98.9	wsnp_BE443288B_Ta_2_1
3B	IWA8594	98.9	wsnp_RFL_Contig4437_5225442
3B	IWA7888	99.5	wsnp_Ra_c35520_44041887
3B	IWA3593	99.5	wsnp_Ex_c36937_44790003
3B	IWA3592	99.5	wsnp_Ex_c36937_44789309
3B	IWA7889	99.5	wsnp_Ra_c35520_44043347
3B	IWA5985	99.8	wsnp_JD_c29407_23413291
3B	IWA3455	99.8	wsnp_Ex_c3389_6223722
3B	IWA1095	99.8	wsnp_CAP7_c522_274783
3B	IWA8104	99.8	wsnp_Ra_c9693_16109264
3B	IWA2862	100.3	wsnp_Ex_c2400_4498931
3B	IWA3901	100.3	wsnp_Ex_c4457_8018164
3B	IWA714	100.3	wsnp_CAP11_c2309_1201554
3B	IWA624	100.3	wsnp_BQ167580B_Ta_2_1
3B	IWA81	100.3	wsnp_BE424246B_Ta_2_2
3B	IWA3598	103.4	wsnp_Ex_c37115_44930934
3B	IWA8053	103.9	wsnp_Ra_c69_149394
3B	IWA3332	103.9	wsnp_Ex_c3130_5790163
3B	IWA3331	103.9	wsnp_Ex_c3130_5789888
3B	IWA8054	103.9	wsnp_Ra_c69_149518
3B	IWA2360	106.4	wsnp_Ex_c18915_27811736
3B	IWA5324	108.6	wsnp_Ex_rep_c66893_65301351
3B	IWA5323	108.6	wsnp_Ex_rep_c66893_65301177
3B	IWA3170	108.6	wsnp_Ex_c2850_5263978
3B	IWA8576	108.6	wsnp_RFL_Contig4270_4938701
3B	IWA1548	108.9	wsnp_Ex_c11893_19077166
3B	IWA4498	108.9	wsnp_Ex_c64005_62987015
3B	IWA6542	109.7	wsnp_Ku_c14875_23320708
3B	IWA4906	109.7	wsnp_Ex_c9390_15586085
3B	IWA2063	109.7	wsnp_Ex_c15795_24169367
3B	IWA1684	109.7	wsnp_Ex_c12781_20280815
3B	IWA6900	109.7	wsnp_Ku_c31407_41142340
3B	IWA7391	110.1	wsnp_Ku_rep_c102162_89197212
3B	IWA5646	110.7	wsnp_Ex_rep_c69845_68804456
3B	IWA8086	110.7	wsnp_Ra_c8570_14489763
3B	IWA7108	110.7	wsnp_Ku_c48254_54492007
3B	IWA6375	110.7	wsnp_Ku_c10196_16926860
3B	IWA5941	110.7	wsnp_JD_c22783_19631797
3B	IWA3591	110.7	wsnp_Ex_c36937_44788679
3B	IWA2620	110.7	wsnp_Ex_c21491_30637789
3B	IWA8287	110.7	wsnp_RFL_Contig204_1272643
3B	IWA3046	110.8	wsnp_Ex_c26406_35653828
3B	IWA7820	111	wsnp_Ra_c27984_37480491
3B	IWA7819	111	wsnp_Ra_c27984_37479613
3B	IWA6299	111	wsnp_JD_rep_c63810_40704815
3B	IWA2951	111	wsnp_Ex_c25104_34368562
3B	IWA1576	111	wsnp_Ex_c1204_2313262
3B	IWA2613	111.7	wsnp_Ex_c21418_30554998
3B	IWA2619	111.9	wsnp_Ex_c21491_30636749
3B	IWA7125	111.9	wsnp_Ku_c49975_55719349
3B	IWA2167	112.2	wsnp_Ex_c1676_3185400
3B	IWA6254	116.8	wsnp_JD_rep_c49010_33257826
3B	IWA344	117.9	wsnp_BE517914B_Ta_2_5
3B	IWA6158	118.4	wsnp_JD_c6974_8084752
3B	IWA6222	118.4	wsnp_JD_c9360_10216526
3B	IWA6157	118.4	wsnp_JD_c6974_8084450
3B	IWA4428	118.4	wsnp_Ex_c6129_10723143
3B	IWA6223	118.4	wsnp_JD_c9371_10224837
3B	IWA1148	118.8	wsnp_CAP8_c1419_836050
3B	IWA4427	118.8	wsnp_Ex_c6129_10723019
3B	IWA7388	119.2	wsnp_Ku_rep_c102135_89174746
3B	IWA4847	119.2	wsnp_Ex_c8825_14757625
3B	IWA4429	119.2	wsnp_Ex_c6129_10723211
3B	IWA1468	119.2	wsnp_Ex_c11313_18277396
3B	IWA1467	119.2	wsnp_Ex_c11313_18277285
3B	IWA7745	119.2	wsnp_Ra_c21364_30746475
3B	IWA1196	119.7	wsnp_CAP8_c4989_2410261
3B	IWA6105	120.2	wsnp_JD_c5643_6802211
3B	IWA6104	120.2	wsnp_JD_c5643_6802088
3B	IWA7225	120.2	wsnp_Ku_c6430_11257008
3B	IWA5805	120.4	wsnp_JD_c12281_12555386
3B	IWA8290	121.3	wsnp_RFL_Contig2073_1317762
3B	IWA7512	121.3	wsnp_Ku_rep_c72700_72370664
3B	IWA6493	121.3	wsnp_Ku_c13311_21255891
3B	IWA5710	121.3	wsnp_Ex_rep_c70809_69689636
3B	IWA4218	121.3	wsnp_Ex_c5418_9575485
3B	IWA3305	121.3	wsnp_Ex_c3096_5709257
3B	IWA3304	121.3	wsnp_Ex_c3096_5708642
3B	IWA3018	121.3	wsnp_Ex_c2609_4852360
3B	IWA2573	121.3	wsnp_Ex_c21094_30222280
3B	IWA8583	121.3	wsnp_RFL_Contig4320_5027794
3B	IWA3306	121.7	wsnp_Ex_c3096_5709369
3B	IWA4653	121.9	wsnp_Ex_c7291_12517871
3B	IWA5711	121.9	wsnp_Ex_rep_c70809_69690102
3B	IWA5775	121.9	wsnp_JD_c10602_11238420
3B	IWA7516	122.5	wsnp_Ku_rep_c72821_72480395
3B	IWA1704	122.5	wsnp_Ex_c12887_20427158
3B	IWA4721	122.5	wsnp_Ex_c7756_13218814
3B	IWA8520	122.5	wsnp_RFL_Contig383_4163148
3B	IWA4507	123.5	wsnp_Ex_c6445_11200449
3B	IWA5178	123.5	wsnp_Ex_rep_c110375_92775402
3B	Xbarc164	124
3B	IWA2351	126.3	wsnp_Ex_c1878_3541204
3B	IWA5890	126.3	wsnp_JD_c1843_2562950
3B	IWA1909	126.9	wsnp_Ex_c14551_22578987
3B	IWA5613	127.5	wsnp_Ex_rep_c69489_68429726
3B	IWA4235	127.5	wsnp_Ex_c5457_9631220
3B	IWA4236	127.5	wsnp_Ex_c5457_9632050
3B	IWA7247	129.1	wsnp_Ku_c6825_11858665
3B	IWA6300	129.1	wsnp_JD_rep_c63942_40788045
3B	IWA4630	129.1	wsnp_Ex_c7172_12318529
3B	IWA4195	129.1	wsnp_Ex_c5378_9505533
3B	IWA4194	129.1	wsnp_Ex_c5378_9505087
3B	IWA4193	129.1	wsnp_Ex_c5378_9504586
3B	IWA3997	129.1	wsnp_Ex_c4769_8510104
3B	IWA2800	129.1	wsnp_Ex_c2330_4366134
3B	IWA2672	129.1	wsnp_Ex_c22016_31191407
3B	IWA1898	129.1	wsnp_Ex_c14462_22457559
3B	IWA1607	129.1	wsnp_Ex_c123_244117
3B	IWA7333	129.1	wsnp_Ku_c8722_14766699
3B	IWA6794	129.9	wsnp_Ku_c26257_36216976
3B	IWA6793	129.9	wsnp_Ku_c26257_36216869
3B	IWA4452	129.9	wsnp_Ex_c6223_10857649
3B	IWA1449	129.9	wsnp_Ex_c1116_2138756
3B	IWA1383	129.9	wsnp_Ex_c10717_17456391
3B	IWA3001	129.9	wsnp_Ex_c2580_4800249
3B	IWA7595	129.9	wsnp_Ra_c12935_20587578
3B	IWA6213	130.3	wsnp_JD_c9042_9950637
3B	IWA2999	130.3	wsnp_Ex_c2580_4799370
3B	IWA6677	130.3	wsnp_Ku_c19631_29148397
3B	IWA2329	130.6	wsnp_Ex_c18624_27492167
3B	IWA3504	130.6	wsnp_Ex_c34975_43204180
3B	IWA6380	132.9	wsnp_Ku_c10291_17065432
3B	IWA5933	132.9	wsnp_JD_c22179_19262979
3B	IWA628	132.9	wsnp_BQ168706B_Ta_2_1
3B	IWA1206	132.9	wsnp_CAP8_c6899_3227098
3B	IWA6381	132.9	wsnp_Ku_c10291_17065480
3B	IWA629	133.2	wsnp_BQ168706B_Ta_2_2
3B	IWA183	133.2	wsnp_BE445508B_Ta_2_1
3B	IWA6698	133.2	wsnp_Ku_c210_413608
3B	IWA5814	133.2	wsnp_JD_c1247_1802330
3B	IWA1598	133.3	wsnp_Ex_c12220_19528388
3B	IWA2400	133.8	wsnp_Ex_c1934_3648624
3B	IWA2990	133.8	wsnp_Ex_c257_491667
3B	IWA2492	133.8	wsnp_Ex_c19982_29009504
3B	IWA292	133.8	wsnp_BE497469B_Ta_2_1
3B	IWA5677	133.8	wsnp_Ex_rep_c70174_69125822
3B	IWA2399	134.7	wsnp_Ex_c1934_3648048
3B	IWA2124	134.7	wsnp_Ex_c16378_24870688
3B	IWA2510	134.7	wsnp_Ex_c20168_29214721
3B	IWA3896	137.7	wsnp_Ex_c44447_50496676
3B	IWA6482	137.7	wsnp_Ku_c13069_20938717
3B	IWA2408	138.6	wsnp_Ex_c19372_28312715
3B	IWA4575	138.9	wsnp_Ex_c6805_11743678
3B	IWA3974	138.9	wsnp_Ex_c4661_8344663
3B	IWA2409	138.9	wsnp_Ex_c19372_28313727
3B	IWA1458	138.9	wsnp_Ex_c11246_18191079
3B	IWA4838	138.9	wsnp_Ex_c8695_14561512
3B	IWA7748	139.2	wsnp_Ra_c21559_30963208
3B	IWA5995	139.2	wsnp_JD_c30422_23944042
3B	IWA5960	139.2	wsnp_JD_c2623_3541255
3B	IWA4412	139.2	wsnp_Ex_c6065_10623213
3B	IWA4054	139.2	wsnp_Ex_c4927_8772847
3B	IWA3788	139.2	wsnp_Ex_c4156_7507247
3B	IWA2663	139.2	wsnp_Ex_c21930_31102685
3B	IWA2074	139.2	wsnp_Ex_c15944_24350833
3B	IWA1827	139.2	wsnp_Ex_c13906_21771680
3B	IWA1416	139.2	wsnp_Ex_c1097_2105209
3B	IWA1414	139.2	wsnp_Ex_c1097_2104088
3B	IWA316	139.2	wsnp_BE498786B_Ta_2_1
3B	IWA2662	139.2	wsnp_Ex_c21930_31102213
3B	IWA8457	139.2	wsnp_RFL_Contig3336_3426054
3B	IWA1417	139.5	wsnp_Ex_c1097_2105311
3B	IWA3787	139.8	wsnp_Ex_c4156_7506400
3B	IWA3117	139.8	wsnp_Ex_c2756_5105594
3B	IWA6761	139.8	wsnp_Ku_c24414_34372822
3B	IWA5396	140.1	wsnp_Ex_rep_c67404_65986980
3B	IWA7285	140.4	wsnp_Ku_c7266_12549538
3B	IWA6200	140.4	wsnp_JD_c8629_9593896
3B	IWA5925	140.4	wsnp_JD_c2146_2955972
3B	IWA8326	140.4	wsnp_RFL_Contig2338_1839077
3B	IWA6185	141	wsnp_JD_c8158_9193784
3B	IWA6201	141	wsnp_JD_c8629_9593995
3B	IWA186	141.3	wsnp_BE446087B_Ta_2_1
3B	IWA4439	144.9	wsnp_Ex_c6162_10773908
3B	IWA7510	144.9	wsnp_Ku_rep_c72504_72191206
3B	IWA5100	145.8	wsnp_Ex_rep_c103505_88446868
3B	IWA3710	145.8	wsnp_Ex_c40060_47197384
3B	IWA2022	145.8	wsnp_Ex_c15399_23662312
3B	IWA5101	145.8	wsnp_Ex_rep_c103505_88447145
3B	IWA7519	146.3	wsnp_Ku_rep_c73198_72796386
3B	IWA8196	146.3	wsnp_Ra_rep_c74606_72470419
3B	IWA3245	148.2	wsnp_Ex_c29631_38640100
3B	IWA5869	148.9	wsnp_JD_c15974_15272598
3B	IWA6297	148.9	wsnp_JD_rep_c63654_40605158
3B	IWA4863	149	wsnp_Ex_c9002_14999105
3B	IWA4613	149	wsnp_Ex_c7021_12096881
3B	IWA6720	149	wsnp_Ku_c21818_31604716
3B	IWA7035	149.6	wsnp_Ku_c4078_7436510
3B	IWA3021	156.6	wsnp_Ex_c26128_35374652
3B	IWA6814	156.6	wsnp_Ku_c27177_37127542
3B	IWA8480	157.8	wsnp_RFL_Contig3529_3696847
3B	IWA2550	159.7	wsnp_Ex_c20652_29734133
3B	IWA7294	166.2	wsnp_Ku_c7784_13343904
3B	IWA6165	166.2	wsnp_JD_c7325_8422075
3B	IWA4310	166.2	wsnp_Ex_c5657_9942445
3B	IWA4040	166.2	wsnp_Ex_c4888_8714379
3B	IWA4039	166.2	wsnp_Ex_c4888_8713275
3B	IWA1863	166.2	wsnp_Ex_c14147_22077948
3B	IWA4755	166.6	wsnp_Ex_c7967_13522958
3B	IWA4226	166.6	wsnp_Ex_c54357_57265797
3B	IWA7860	166.6	wsnp_Ra_c32055_41111615
3B	IWA3425	169.2	wsnp_Ex_c33140_41677398
3B	IWA1995	172	wsnp_Ex_c15264_23484775
3B	IWA3904	172	wsnp_Ex_c447_876091
3B	IWA747	172.8	wsnp_CAP11_c323_263628
3B	IWA748	172.8	wsnp_CAP11_c323_263800
3B	IWA3726	173.2	wsnp_Ex_c4063_7344641
3B	IWA7267	173.4	wsnp_Ku_c7173_12391539
3B	IWA6192	173.4	wsnp_JD_c828_1226159
3B	IWA3732	173.4	wsnp_Ex_c4069_7355431
3B	IWA3731	173.4	wsnp_Ex_c4069_7355357
3B	IWA6919	173.4	wsnp_Ku_c33335_42844594
3B	IWA6920	174.4	wsnp_Ku_c33335_42844680
3B	IWA3725	174.4	wsnp_Ex_c4063_7344449
3B	IWA3150	174.4	wsnp_Ex_c2820_5215394
3B	IWA3149	174.4	wsnp_Ex_c2820_5214711
3B	IWA6238	175.4	wsnp_JD_c9805_10591233
3B	IWA7714	175.4	wsnp_Ra_c20041_29283768
3B	IWA3426	179.2	wsnp_Ex_c33140_41677458
3B	IWA6632	179.2	wsnp_Ku_c17659_26797674
3B	IWA6464	182.3	wsnp_Ku_c12544_20235135
3B	IWA8460	183.4	wsnp_RFL_Contig3344_3442711
3B	IWA3983	185.3	wsnp_Ex_c47078_52393295
3B	IWA5618	188.8	wsnp_Ex_rep_c69595_68543549
3B	IWA280	190	wsnp_BE496983B_Ta_2_1
3B	IWA4625	191.7	wsnp_Ex_c7108_12222850
3B	IWA4624	191.7	wsnp_Ex_c7108_12222660
3B	IWA663	191.7	wsnp_CAP11_c1214_700174
3B	IWA7794	191.7	wsnp_Ra_c26083_35644783
3B	IWA7342	192.5	wsnp_Ku_c9009_15185650
3B	IWA7363	220.8	wsnp_Ku_c9596_16057771
3B	IWA7678	221.7	wsnp_Ra_c18153_27161629
3B	IWA7231	221.7	wsnp_Ku_c663_1368085
3B	IWA3260	221.7	wsnp_Ex_c3005_5548573
3B	IWA1702	228.4	wsnp_Ex_c12875_20407926
3B	IWA6587	228.8	wsnp_Ku_c1629_3206989
3B	IWA7918	228.8	wsnp_Ra_c41135_48426638
3B	IWA3103	229.9	wsnp_Ex_c2723_5047696
3B	IWA4796	229.9	wsnp_Ex_c8360_14085858
3B	IWA6471	229.9	wsnp_Ku_c12698_20441325
3B	IWA5202	230.7	wsnp_Ex_rep_c66331_64502558
3B	IWA5201	230.7	wsnp_Ex_rep_c66331_64502363
3B	IWA5203	230.7	wsnp_Ex_rep_c66331_64503065
3B	IWA4654	231.5	wsnp_Ex_c7316_12552186
3B	IWA3724	232.1	wsnp_Ex_c40595_47620787
3B	IWA6651	232.1	wsnp_Ku_c18473_27773912
3B	IWA4801	232.9	wsnp_Ex_c8386_14128029
3B	IWA7230	232.9	wsnp_Ku_c6602_11531957
3B	IWA5106	233.9	wsnp_Ex_rep_c103892_88739043
3B	IWA4800	233.9	wsnp_Ex_c8386_14127329
3B	IWA2822	233.9	wsnp_Ex_c23633_32868822
3B	IWA7174	233.9	wsnp_Ku_c55746_59522526
3B	Xbarc147	237
3B	Xgwm533	238.3
3B	Xstsp	240
3B	Xgwm389	242.2
3B	IWA195	244	wsnp_BE446462D_Ta_2_3
3D	IWA7526	0	wsnp_Ku_rep_c87658_81274182
3D	IWA6777	0	wsnp_Ku_c25527_35493338
3D	IWA4081	0	wsnp_Ex_c5061_8986366
3D	IWA1714	0	wsnp_Ex_c12963_20529801
3D	IWA4682	0	wsnp_Ex_c7451_12757152
3D	IWA4683	0	wsnp_Ex_c7451_12757458
3D	IWA643	0	wsnp_CAP11_c1051_622082
3D	IWA6725	0	wsnp_Ku_c2249_4335279
3D	IWA7274	0	wsnp_Ku_c7264_12545135
3D	IWA1715	0	wsnp_Ex_c12963_20529964
3D	IWA7823	0	wsnp_Ra_c28858_38278180
3D	IWA1796	1.6	wsnp_Ex_c13629_21411429
3D	IWA1616	1.6	wsnp_Ex_c12369_19730765
3D	IWA6119	0	wsnp_JD_c5919_7081809
3D	IWA5469	0.8	wsnp_Ex_rep_c67897_66613415
3D	IWA3573	1.6	wsnp_Ex_c36364_44338188
3D	Xwmc533	7
3D	Xgwm191.1	9.6
4A	IWA482	0	wsnp_BF474615A_Ta_1_1
4A	IWA2793	0.3	wsnp_Ex_c23248_32488191
4A	IWA2794	0.3	wsnp_Ex_c23248_32488251
4A	IWA1846	0.9	wsnp_Ex_c14026_21924297
4A	IWA6850	0.9	wsnp_Ku_c28756_38667953
4A	IWA5544	3.2	wsnp_Ex_rep_c68569_67411985
4A	IWA6501	3.2	wsnp_Ku_c13640_21686670
4A	IWA1792	3.5	wsnp_Ex_c13615_21393511
4A	IWA402	3.5	wsnp_BE637808A_Ta_2_1
4A	IWA5123	3.5	wsnp_Ex_rep_c104859_89444355
4A	IWA3191	4.9	wsnp_Ex_c2884_5319215
4A	IWA2901	4.9	wsnp_Ex_c24443_33688235
4A	IWA2900	4.9	wsnp_Ex_c24443_33687802
4A	IWA2585	4.9	wsnp_Ex_c21197_30325539
4A	IWA4698	4.9	wsnp_Ex_c7528_12868250
4A	IWA4867	4.9	wsnp_Ex_c9035_15054913
4A	IWA7699	4.9	wsnp_Ra_c19085_28218299
4A	IWA4319	5.6	wsnp_Ex_c56880_58824784
4A	IWA1400	5.6	wsnp_Ex_c10886_17694220
4A	IWA7604	5.6	wsnp_Ra_c13301_21079434
4A	IWA1727	6.3	wsnp_Ex_c13091_20706489
4A	IWA1941	6.3	wsnp_Ex_c14793_22908184
4A	IWA2902	10.3	wsnp_Ex_c24443_33688268
4A	IWA2854	34.4	wsnp_Ex_c2389_4479352
4A	IWA7394	34.7	wsnp_Ku_rep_c102527_89481571
4A	IWA4981	34.8	wsnp_Ex_c9928_16346945
4A	IWA1137	37.4	wsnp_CAP8_c1013_646748
4A	IWA8389	39.3	wsnp_RFL_Contig2771_2524880
4A	IWA285	39.3	wsnp_BE497160A_Ta_1_1
4A	IWA54	39.3	wsnp_BE405275A_Ta_1_1
4A	IWA3161	40.7	wsnp_Ex_c28429_37553452
4A	IWA4232	42.5	wsnp_Ex_c54453_57331510
4A	IWA5363	44.1	wsnp_Ex_rep_c67145_65628860
4A	IWA4260	49.2	wsnp_Ex_c55245_57821389
4A	IWA6394	49.2	wsnp_Ku_c10451_17281845
4A	IWA4480	50.6	wsnp_Ex_c6320_11003591
4A	IWA3584	50.6	wsnp_Ex_c36701_44603531
4A	IWA6100	50.6	wsnp_JD_c5499_6647799
4A	IWA5831	50.6	wsnp_JD_c13364_13377722
4A	IWA4479	50.6	wsnp_Ex_c6320_11003498
4A	IWA4261	50.6	wsnp_Ex_c55245_57821568
4A	IWA4252	50.6	wsnp_Ex_c5487_9686018
4A	IWA4251	50.6	wsnp_Ex_c5487_9685671
4A	IWA2108	50.6	wsnp_Ex_c16228_24682090
4A	IWA2066	50.6	wsnp_Ex_c15801_24178779
4A	IWA1992	50.6	wsnp_Ex_c1520_2906995
4A	IWA1728	50.6	wsnp_Ex_c13105_20721321
4A	IWA3902	50.6	wsnp_Ex_c44587_50598716
4A	IWA7521	53.9	wsnp_Ku_rep_c76865_75281903
4A	IWA7537	53.9	wsnp_Ra_c10536_17322563
4A	IWA7124	54.3	wsnp_Ku_c49919_55679171
4A	IWA8296	54.9	wsnp_RFL_Contig2124_1400618
4A	IWA8265	54.9	wsnp_RFL_Contig1883_1034534
4A	IWA7082	54.9	wsnp_Ku_c45402_52441586
4A	IWA7080	54.9	wsnp_Ku_c45402_52441010
4A	IWA6678	54.9	wsnp_Ku_c19762_29300876
4A	IWA6659	54.9	wsnp_Ku_c18734_28082266
4A	IWA5648	54.9	wsnp_Ex_rep_c69852_68811496
4A	IWA5647	54.9	wsnp_Ex_rep_c69852_68811339
4A	IWA5490	54.9	wsnp_Ex_rep_c68052_66798492
4A	IWA5196	54.9	wsnp_Ex_rep_c66304_64468123
4A	IWA5127	54.9	wsnp_Ex_rep_c105114_89631277
4A	IWA3763	54.9	wsnp_Ex_c41192_48071978
4A	IWA3671	54.9	wsnp_Ex_c39168_46522625
4A	IWA3309	54.9	wsnp_Ex_c30989_39836304
4A	IWA3308	54.9	wsnp_Ex_c30989_39836034
4A	IWA1969	54.9	wsnp_Ex_c15000_23158167
4A	IWA912	54.9	wsnp_CAP12_c124_70843
4A	IWA750	54.9	wsnp_CAP11_c3346_1639010
4A	IWA8494	54.9	wsnp_RFL_Contig362_3816537
4A	IWA3818	55.3	wsnp_Ex_c4220_7623030
4A	IWA5705	56.2	wsnp_Ex_rep_c70681_69583486
4A	IWA8150	57.2	wsnp_Ra_rep_c113072_94706239
4A	IWA6702	57.2	wsnp_Ku_c2114_4088504
4A	IWA6701	57.2	wsnp_Ku_c2114_4088174
4A	IWA5237	57.2	wsnp_Ex_rep_c66426_64645835
4A	IWA5236	57.2	wsnp_Ex_rep_c66426_64644630
4A	IWA8342	57.2	wsnp_RFL_Contig2500_2084385
4A	IWA8459	59.3	wsnp_RFL_Contig3341_3436476
4A	IWA8414	59.3	wsnp_RFL_Contig30_2884966
4A	IWA8220	59.3	wsnp_RFL_Contig1073_101625
4A	IWA7657	59.3	wsnp_Ra_c16634_25331368
4A	IWA7617	59.3	wsnp_Ra_c13906_21872355
4A	IWA7271	59.3	wsnp_Ku_c7197_12439730
4A	IWA7133	59.3	wsnp_Ku_c50991_56423564
4A	IWA6873	59.3	wsnp_Ku_c30381_40208899
4A	IWA6540	59.3	wsnp_Ku_c14803_23225628
4A	IWA6531	59.3	wsnp_Ku_c14515_22860258
4A	IWA6392	59.3	wsnp_Ku_c10434_17255840
4A	IWA6046	59.3	wsnp_JD_c4217_5322858
4A	IWA6020	59.3	wsnp_JD_c36045_26751163
4A	IWA5865	59.3	wsnp_JD_c15643_15039462
4A	IWA5851	59.3	wsnp_JD_c14769_14413046
4A	IWA5652	59.3	wsnp_Ex_rep_c69890_68851948
4A	IWA5498	59.3	wsnp_Ex_rep_c68124_66892390
4A	IWA5309	59.3	wsnp_Ex_rep_c66839_65233112
4A	IWA5069	59.3	wsnp_Ex_rep_c102623_87746777
4A	IWA4700	59.3	wsnp_Ex_c7550_12907422
4A	IWA4513	59.3	wsnp_Ex_c64609_63343875
4A	IWA4405	59.3	wsnp_Ex_c6044_10590220
4A	IWA3565	59.3	wsnp_Ex_c36141_44153175
4A	IWA3541	59.3	wsnp_Ex_c35839_43909163
4A	IWA3361	59.3	wsnp_Ex_c3178_5868813
4A	IWA3326	59.3	wsnp_Ex_c31249_40066886
4A	IWA3311	59.3	wsnp_Ex_c31006_39850673
4A	IWA2781	59.3	wsnp_Ex_c23130_32358433
4A	IWA2000	59.3	wsnp_Ex_c15282_23505878
4A	IWA1904	59.3	wsnp_Ex_c14529_22547438
4A	IWA1077	59.3	wsnp_CAP7_c32_19340
4A	IWA493	59.3	wsnp_BF482269A_Ta_2_1
4A	IWA172	59.3	wsnp_BE445427A_Ta_2_1
4A	IWA115	59.3	wsnp_BE442961A_Ta_2_1
4A	IWA110	59.3	wsnp_BE442776A_Ta_2_2
4A	IWA109	59.3	wsnp_CAP7_c4513_2055201
4A	IWA6944	59.3	wsnp_Ku_c34883_44172415
4A	IWA5729	59.3	wsnp_Ex_rep_c71305_70087742
4A	IWA4772	59.3	wsnp_Ex_c8131_13754852
4A	IWA3581	59.3	wsnp_Ex_c3666_6687275
4A	IWA1060	59.3	wsnp_CAP7_c2243_1090229
4A	IWA296	59.3	wsnp_BE497618A_Ta_1_1
4A	IWA2292	59.5	wsnp_Ex_c18229_27041048
4A	IWA5457	60.1	wsnp_Ex_rep_c67799_66488792
4A	IWA7134	60.1	wsnp_Ku_c50991_56423610
4A	IWA7216	60.7	wsnp_Ku_c61953_63254478
4A	IWA7092	60.7	wsnp_Ku_c46057_52907637
4A	IWA6597	60.7	wsnp_Ku_c16481_25377573
4A	IWA5897	60.7	wsnp_JD_c19109_17348071
4A	IWA4406	60.7	wsnp_Ex_c6044_10590322
4A	IWA4079	60.7	wsnp_Ex_c50586_54818545
4A	IWA3845	60.7	wsnp_Ex_c4286_7734046
4A	IWA3542	60.7	wsnp_Ex_c35839_43909849
4A	IWA1694	60.7	wsnp_Ex_c12818_20334933
4A	IWA1693	60.7	wsnp_Ex_c12818_20334501
4A	IWA1341	60.7	wsnp_Ex_c10527_17198865
4A	IWA1320	60.7	wsnp_Ex_c10390_17007929
4A	IWA112	60.7	wsnp_BE442869A_Ta_2_1
4A	IWA3582	60.7	wsnp_Ex_c3666_6687919
4A	IWA3088	60.7	wsnp_Ex_c27088_36309449
4A	IWA3029	60.7	wsnp_Ex_c2617_4864955
4A	IWA3028	60.7	wsnp_Ex_c2617_4864441
4A	IWA3027	60.7	wsnp_Ex_c2617_4864218
4A	IWA2334	60.7	wsnp_Ex_c1865_3515470
4A	IWA1919	60.7	wsnp_Ex_c14641_22698595
4A	IWA1178	60.7	wsnp_CAP8_c296_283066
4A	IWA826	60.7	wsnp_CAP11_c992_593615
4A	IWA7270	60.7	wsnp_Ku_c7197_12439299
4A	IWA1639	61.9	wsnp_Ex_c12481_19890975
4A	IWA385	61.9	wsnp_BE591861A_Ta_2_5
4A	IWA192	61.9	wsnp_BE446344A_Ta_2_1
4A	IWA160	61.9	wsnp_BE444858A_Ta_2_1
4A	IWA142	61.9	wsnp_BE443973A_Ta_2_1
4A	IWA157	61.9	wsnp_BE444811A_Ta_2_1
4A	IWA6103	61.9	wsnp_JD_c5620_6774675
4A	IWA3324	61.9	wsnp_Ex_c31173_39999624
4A	IWA1327	61.9	wsnp_Ex_c10463_17113256
4A	IWA1071	61.9	wsnp_CAP7_c2731_1307600
4A	IWA3604	61.9	wsnp_Ex_c37383_45143321
4A	IWA5553	62.5	wsnp_Ex_rep_c68601_67451370
4A	IWA3826	62.9	wsnp_Ex_c42406_48991013
4A	IWA5335	63.3	wsnp_Ex_rep_c66930_65358529
4A	IWA3877	63.3	wsnp_Ex_c43734_49968808
4A	IWA3522	63.3	wsnp_Ex_c3541_6477925
4A	IWA3118	63.3	wsnp_Ex_c2757_5107541
4A	IWA2699	63.3	wsnp_Ex_c22242_31433907
4A	IWA6443	63.3	wsnp_Ku_c11945_19406789
4A	IWA3173	64.4	wsnp_Ex_c28548_37671437
4A	IWA4709	64.4	wsnp_Ex_c7658_13075559
4A	IWA730	64.7	wsnp_CAP11_c279_238344
4A	IWA5975	66.6	wsnp_JD_c27944_22630918
4A	IWA4560	66.6	wsnp_Ex_c6644_11508418
4A	IWA4230	66.6	wsnp_Ex_c54395_57291841
4A	IWA3026	66.6	wsnp_Ex_c2617_4863745
4A	IWA1824	66.6	wsnp_Ex_c1387_2659020
4A	IWA7522	66.6	wsnp_Ku_rep_c77171_75478137
4A	IWA4771	66.6	wsnp_Ex_c8131_13753986
4A	IWA3792	66.6	wsnp_Ex_c4166_7525617
4A	IWA7859	66.6	wsnp_Ra_c31915_40982091
4A	IWA401	68.3	wsnp_BE637507A_Ta_2_1
4A	IWA40	68.3	wsnp_BE403900A_Ta_2_1
4A	IWA4876	68.3	wsnp_Ex_c9094_15139750
4A	IWA1329	68.3	wsnp_Ex_c10479_17138283
4A	IWA5699	70	wsnp_Ex_rep_c70578_69495303
4A	IWA7448	70	wsnp_Ku_rep_c68861_68030775
4A	IWA5349	76.5	wsnp_Ex_rep_c67054_65517671
4A	IWA2606	78.5	wsnp_Ex_c21383_30513824
4A	IWA7077	79.1	wsnp_Ku_c45197_52288542
4A	IWA4023	80.3	wsnp_Ex_c48449_53350799
4A	IWA6193	82.4	wsnp_JD_c8309_9321723
4A	IWA7442	82.9	wsnp_Ku_rep_c68565_67614479
4A	IWA6884	85.1	wsnp_Ku_c3081_5777347
4A	IWA6883	85.1	wsnp_Ku_c3081_5777013
4A	IWA6882	85.1	wsnp_Ku_c3081_5776947
4A	IWA6885	85.1	wsnp_Ku_c3081_5778117
4A	IWA3981	85.3	wsnp_Ex_c469_928349
4A	IWA8432	86.3	wsnp_RFL_Contig3138_3094305
4A	IWA6454	87.1	wsnp_Ku_c1205_2398925
4A	IWA4199	88.6	wsnp_Ex_c539_1072859
4A	IWA5422	89.3	wsnp_Ex_rep_c67606_66250361
4A	IWA3728	89.3	wsnp_Ex_c4068_7351806
4A	IWA2582	89.3	wsnp_Ex_c21165_30292808
4A	IWA2581	89.3	wsnp_Ex_c21165_30292765
4A	IWA2207	89.3	wsnp_Ex_c17338_26018247
4A	IWA7535	89.3	wsnp_Ra_c1022_2067517
4A	IWA5116	94.2	wsnp_Ex_rep_c104448_89161562
4A	IWA1720	94.2	wsnp_Ex_c13031_20625900
4A	IWA5200	94.2	wsnp_Ex_rep_c66324_64493429
4A	IWA7058	95.5	wsnp_Ku_c4342_7887834
4A	IWA4425	109.3	wsnp_Ex_c612_1213451
4A	IWA6035	109.3	wsnp_JD_c38619_27992279
4A	IWA6506	122.6	wsnp_Ku_c13768_21859275
4A	IWA8168	123	wsnp_Ra_rep_c70233_67968353
4A	IWA6418	123	wsnp_Ku_c11227_18378980
4A	IWA2761	124	wsnp_Ex_c2288_4293430
4A	IWA3061	142.8	wsnp_Ex_c26740_35969367
4A	IWA4527	145.1	wsnp_Ex_c6514_11307200
4A	IWA5968	145.1	wsnp_JD_c27162_22206547
4A	IWA3068	147.3	wsnp_Ex_c26776_36003586
4A	IWA7322	147.8	wsnp_Ku_c8391_14261321
4A	IWA585	147.8	wsnp_BG607523B_Ta_2_4
4A	IWA6690	165.3	wsnp_Ku_c20783_30448706
4A	IWA2170	165.3	wsnp_Ex_c16814_25373602
4A	IWA1067	165.3	wsnp_CAP7_c254_139077
4A	IWA1066	165.3	wsnp_CAP7_c254_138937
4A	IWA3864	165.7	wsnp_Ex_c4331_7808746
4A	IWA7049	165.7	wsnp_Ku_c42833_50483239
4A	Xgwm160	176.4
4A	IWA7197	183	wsnp_Ku_c5874_10384800
4A	IWA4688	183	wsnp_Ex_c7489_12809914
4A	IWA4132	183	wsnp_Ex_c5231_9256869
4A	IWA4083	183	wsnp_Ex_c5072_9006666
4A	IWA2377	183	wsnp_Ex_c19094_28015035
4A	IWA2756	183	wsnp_Ex_c22830_32035900
4A	IWA7304	183	wsnp_Ku_c792_1635317
4A	IWA6696	183.7	wsnp_Ku_c20949_30631810
4A	IWA6774	184	wsnp_Ku_c25372_35336531
4A	IWA5265	185.9	wsnp_Ex_rep_c66551_64836462
4A	IWA3192	186.1	wsnp_Ex_c2886_5325103
4A	IWA1836	186.5	wsnp_Ex_c13953_21832185
4A	IWA1835	186.5	wsnp_Ex_c13953_21831752
4A	IWA7126	186.5	wsnp_Ku_c5033_8989455
4A	IWA6878	189.8	wsnp_Ku_c3056_5734773
4A	IWA4946	189.8	wsnp_Ex_c9618_15912364
4A	Xwmc313.1	193.7
4A	Xwmc313.5	195.4
4A	Xwmc307.2	195.4
4A	Xwmc376.3	198.9
4A	IWA6563	206.7	wsnp_Ku_c15531_24168235
4A	IWA559	208.6	wsnp_BG313770B_Ta_1_3
4A	IWA558	208.6	wsnp_BG313770B_Ta_1_1
4B	IWA6457	0	wsnp_Ku_c12399_20037334
4B	IWA7729	1.4	wsnp_Ra_c2078_4037878
4B	IWA2228	9.7	wsnp_Ex_c17561_26284693
4B	IWA506	10.2	wsnp_BF483640B_Ta_2_2
4B	IWA1768	11.4	wsnp_Ex_c13357_21054802
4B	IWA8107	18.1	wsnp_Ra_c9755_16199734
4B	IWA8108	18.5	wsnp_Ra_c9755_16200944
4B	IWA7268	18.5	wsnp_Ku_c7180_12403155
4B	IWA2298	18.5	wsnp_Ex_c18318_27140346
4B	IWA1316	18.5	wsnp_Ex_c10347_16946522
4B	Xwmc617.2	19.8
4B	IWA3615	21.5	wsnp_Ex_c37502_45236634
4B	IWA7266	22.2	wsnp_Ku_c7153_12360198
4B	IWA3290	26	wsnp_Ex_c30695_39579408
4B	IWA4662	29	wsnp_Ex_c7362_12622736
4B	Xgwm368	44.9
4B	Xbarc20	46.3
4B	Xwmc48	47.2
4B	Xwmc826.1	51.9
4B	IWA453	54.4	wsnp_BF293573B_Ta_1_1
4B	IWA327	55.6	wsnp_BE499456B_Ta_1_1
4B	IWA7752	59	wsnp_Ra_c22026_31453420
4B	IWA113	59.6	wsnp_BE442869B_Ta_1_1
4B	IWA7641	60.2	wsnp_Ra_c15715_24192817
4B	IWA5679	60.8	wsnp_Ex_rep_c70265_69211592
4B	IWA58	60.8	wsnp_BE405519B_Ta_1_1
4B	IWA907	62.1	wsnp_CAP12_c1101_569479
4B	IWA3074	63.8	wsnp_Ex_c26807_36031771
4B	Xgwm149	70.8
4B	IWA7688	72.3	wsnp_Ra_c18498_27571740
4B	IWA6898	72.3	wsnp_Ku_c31283_41033384
4B	IWA6495	72.3	wsnp_Ku_c13381_21349778
4B	IWA6011	72.3	wsnp_JD_c33645_25575463
4B	IWA5725	72.3	wsnp_Ex_rep_c71154_69976915
4B	IWA5195	72.3	wsnp_Ex_rep_c66285_64443309
4B	IWA4330	72.3	wsnp_Ex_c57212_59019379
4B	IWA4248	72.3	wsnp_Ex_c5479_9671318
4B	IWA4070	72.3	wsnp_Ex_c50195_54565006
4B	IWA3846	72.3	wsnp_Ex_c42895_49355806
4B	IWA3392	72.3	wsnp_Ex_c32467_41117359
4B	IWA2745	72.3	wsnp_Ex_c22740_31947788
4B	IWA2666	72.3	wsnp_Ex_c220_432519
4B	IWA2155	72.3	wsnp_Ex_c16611_25142774
4B	IWA1961	72.3	wsnp_Ex_c14962_23115336
4B	IWA1105	72.3	wsnp_CAP7_c8429_3785777
4B	IWA1007	72.3	wsnp_CAP12_rep_c4278_1949864
4B	IWA1006	72.3	wsnp_CAP12_rep_c4278_1949802
4B	IWA782	72.3	wsnp_CAP11_c575_392117
4B	IWA7167	72.3	wsnp_Ku_c5502_9764246
4B	IWA8019	72.3	wsnp_Ra_c59050_60525086
4B	IWA7168	72.7	wsnp_Ku_c5502_9765942
4B	IWA2532	72.7	wsnp_Ex_c20377_29442562
4B	IWA2398	72.7	wsnp_Ex_c19319_28253742
4B	IWA1818	72.7	wsnp_Ex_c13849_21698240
4B	IWA1344	72.7	wsnp_Ex_c10548_17228697
4B	IWA7437	72.7	wsnp_Ku_rep_c68318_67259259
4B	IWA3551	73.8	wsnp_Ex_c35910_43971560
4B	IWA3608	73.8	wsnp_Ex_c37437_45183193
4B	IWA4640	74.4	wsnp_Ex_c72198_70679871
4B	IWA3611	74.4	wsnp_Ex_c37437_45184851
4B	IWA3610	74.4	wsnp_Ex_c37437_45184082
4B	IWA3609	74.4	wsnp_Ex_c37437_45183236
4B	IWA187	74.4	wsnp_BE446161B_Td_2_2
4B	IWA2755	75	wsnp_Ex_c22785_31991891
4B	IWA2754	75	wsnp_Ex_c22785_31991697
4B	IWA2393	75	wsnp_Ex_c19277_28209074
4B	IWA2171	75	wsnp_Ex_c16825_25387841
4B	IWA1382	75	wsnp_Ex_c107075_90880218
4B	IWA2974	75	wsnp_Ex_c25467_34731005
4B	IWA7172	75.4	wsnp_Ku_c5566_9864771
4B	IWA3253	75.4	wsnp_Ex_c29867_38850724
4B	IWA892	76.8	wsnp_CAP11_rep_c8663_3738968
4B	IWA3279	77.2	wsnp_Ex_c30473_39386277
4B	IWA4115	77.2	wsnp_Ex_c5187_9195120
4B	IWA908	77.3	wsnp_CAP12_c1101_569783
4B	IWA1028	77.3	wsnp_CAP7_c1259_634919
4B	IWA3040	82.3	wsnp_Ex_c26285_35531535
4B	IWA5365	83.1	wsnp_Ex_rep_c67159_65649966
4B	IWA6461	83.3	wsnp_Ku_c12503_20174234
4B	IWA329	84.6	wsnp_BE499546B_Ta_2_1
4B	Xbarc114	103.8
4B	IWA4490	106.4	wsnp_Ex_c6381_11093111
4B	IWA6397	106.4	wsnp_Ku_c10515_17368422
4B	IWA5408	106.4	wsnp_Ex_rep_c67510_66116823
4B	IWA2595	106.4	wsnp_Ex_c21293_30421496
4B	IWA1100	106.4	wsnp_CAP7_c599_312057
4B	IWA6465	106.8	wsnp_Ku_c12557_20249122
4B	IWA8197	107.2	wsnp_Ra_rep_c74879_72651462
4B	IWA5885	108.5	wsnp_JD_c17976_16616890
4B	IWA3781	115.2	wsnp_Ex_c4148_7495656
4B	IWA27	115.2	wsnp_BE403378B_Ta_2_1
4B	IWA408	123.5	wsnp_BE638137B_Ta_2_2
4B	Xcfa2149.2	125.8
4D	Xbarc217.2	0
4D	Xwmc720	1.7
4D	IWA6277	5.4	wsnp_JD_rep_c51623_35119179
4D	IWA1633	7.6	wsnp_Ex_c12450_19850925
4D	IWA6613	12	wsnp_Ku_c16998_25992746
4D	IWA3116	13.7	wsnp_Ex_c27524_36724744
4D	IWA3555	22.4	wsnp_Ex_c3603_6584235
4D	IWA3815	22.8	wsnp_Ex_c42133_48794975
5A	Xcfa2149.1	0
5A	IWA5358	1	wsnp_Ex_rep_c67136_65617520
5A	IWA564	1.7	wsnp_BG604404B_Ta_2_1
5A	IWA2645	2.1	wsnp_Ex_c2171_4073721
5A	IWA2641	2.1	wsnp_Ex_c2171_4072774
5A	IWA6082	2.1	wsnp_JD_c493_749195
5A	IWA6988	2.1	wsnp_Ku_c38543_47157828
5A	IWA2642	2.4	wsnp_Ex_c2171_4072995
5A	IWA7509	3.2	wsnp_Ku_rep_c72362_72059764
5A	IWA3335	12.6	wsnp_Ex_c3136_5798236
5A	IWA649	13	wsnp_CAP11_c1116_654975
5A	IWA648	13	wsnp_CAP11_c1116_654940
5A	IWA3391	13.4	wsnp_Ex_c32414_41076471
5A	Xwmc524	15.1
5A	IWA7491	19.4	wsnp_Ku_rep_c71232_70948744
5A	IWA2840	19.4	wsnp_Ex_c23795_33034037
5A	IWA2839	19.4	wsnp_Ex_c23795_33033959
5A	IWA2838	19.4	wsnp_Ex_c23795_33033150
5A	IWA2837	19.4	wsnp_Ex_c23795_33033010
5A	IWA7568	32.6	wsnp_Ra_c11532_18688426
5A	IWA5154	34.8	wsnp_Ex_rep_c107017_90850230
5A	IWA675	80.8	wsnp_CAP11_c1506_840951
5A	IWA3702	80.8	wsnp_Ex_c40019_47165575
5A	IWA7044	80.8	wsnp_Ku_c42416_50159402
5A	IWA2959	82.7	wsnp_Ex_c2526_4715978
5A	IWA3623	82.7	wsnp_Ex_c3772_6866645
5A	IWA7014	83.8	wsnp_Ku_c3973_7261765
5A	IWA4744	84.2	wsnp_Ex_c790_1554988
5A	IWA674	85.4	wsnp_CAP11_c1506_840938
5A	IWA3705	85.4	wsnp_Ex_c40019_47166980
5A	IWA3704	85.4	wsnp_Ex_c40019_47166796
5A	IWA3703	85.4	wsnp_Ex_c40019_47166716
5A	IWA7043	85.4	wsnp_Ku_c42416_50159250
5A	IWA6682	95.2	wsnp_Ku_c20011_29589289
5A	IWA6683	95.2	wsnp_Ku_c20011_29589514
5A	IWA4468	95.2	wsnp_Ex_c62818_62296518
5A	IWA3625	95.2	wsnp_Ex_c37943_45584325
5A	IWA4814	100.2	wsnp_Ex_c8543_14357385
5A	IWA835	100.2	wsnp_CAP11_rep_c4073_1924782
5A	IWA5173	100.2	wsnp_Ex_rep_c109532_92292121
5A	IWA5040	101.5	wsnp_Ex_rep_c101994_87256479
5A	IWA3887	101.5	wsnp_Ex_c44164_50292954
5A	IWA2657	101.5	wsnp_Ex_c2185_4094843
5A	IWA8320	101.5	wsnp_RFL_Contig2265_1693968
5A	IWA2350	101.9	wsnp_Ex_c18754_27630557
5A	IWA2256	102.1	wsnp_Ex_c17763_26513562
5A	IWA4448	102.1	wsnp_Ex_c621_1231298
5A	IWA4449	102.4	wsnp_Ex_c621_1231444
5A	IWA7255	102.7	wsnp_Ku_c6977_12078791
5A	IWA4447	102.7	wsnp_Ex_c621_1230852
5A	IWA2223	102.7	wsnp_Ex_c17476_26190830
5A	IWA7256	102.7	wsnp_Ku_c6977_12078885
5A	IWA4221	104.6	wsnp_Ex_c54193_57155632
5A	IWA4462	104.8	wsnp_Ex_c62466_62094396
5A	IWA4220	104.8	wsnp_Ex_c54193_57155537
5A	IWA590	104.8	wsnp_BJ224975A_Ta_2_2
5A	IWA454	104.8	wsnp_BF293620A_Ta_2_1
5A	IWA46	104.8	wsnp_BE404341A_Ta_2_3
5A	IWA2	104.8	wsnp_AJ612027A_Ta_2_5
5A	IWA455	105.2	wsnp_BF293620A_Ta_2_3
5A	IWA4398	105.2	wsnp_Ex_c5998_10513766
5A	IWA5288	105.4	wsnp_Ex_rep_c66689_65011117
5A	IWA1398	106.5	wsnp_Ex_c10853_17650289
5A	IWA6961	108.1	wsnp_Ku_c3684_6789632
5A	IWA4469	109.2	wsnp_Ex_c62818_62296773
5A	IWA5838	109.2	wsnp_JD_c13773_13680294
5A	IWA7579	109.4	wsnp_Ra_c12183_19587379
5A	IWA6681	109.4	wsnp_Ku_c20011_29589089
5A	IWA1752	109.4	wsnp_Ex_c13258_20911706
5A	IWA7553	109.4	wsnp_Ra_c10915_17838202
5A	IWA7025	112.4	wsnp_Ku_c40349_48594583
5A	IWA4861	112.4	wsnp_Ex_c898_1739090
5A	IWA4860	112.4	wsnp_Ex_c898_1738424
[truncated: 1,687 more rows]

## Sheet: Ning7840 x Clark map
No.	Chromosome	Marker index	Genetic distance(Kosambi,cM)	Marker
1	1A	IWA4518	0	wsnp_Ex_c6476_11246531
2	1A	IWA4271	0	wsnp_Ex_c5550_9779698
3	1A	IWA7289	0	wsnp_Ku_c754_1557338
4	1A	IWA3764	0.8	wsnp_Ex_c412_814247
5	1A	IWA1644	0.8	wsnp_Ex_c1255_2411550
6	1A	IWA6916	0.8	wsnp_Ku_c330_683203
7	1A	IWA3661	2.5	wsnp_Ex_c3887_7051325
8	1A	IWA3215	10.2	wsnp_Ex_c2918_5381441
9	1A	IWA3799	10.2	wsnp_Ex_c4186_7560575
10	1A	IWA3977	11.4	wsnp_Ex_c46670_52108070
11	1A	IWA4944	15.7	wsnp_Ex_c9600_15889658
12	1A	IWA4943	15.7	wsnp_Ex_c9600_15889471
13	1A	IWA1710	15.7	wsnp_Ex_c12932_20486842
14	1A	IWA5407	15.7	wsnp_Ex_rep_c67492_66096650
15	1A	IWA3590	19.5	wsnp_Ex_c36911_44767554
16	1A	IWA2015	19.5	wsnp_Ex_c15377_23637176
17	1A	IWA5097	19.5	wsnp_Ex_rep_c103474_88421290
18	1A	IWA8051	20.7	wsnp_Ra_c6891_11974621
19	1A	IWA2035	20.7	wsnp_Ex_c1557_2973321
20	1A	IWA1560	20.7	wsnp_Ex_c11939_19147790
21	1A	IWA1559	20.7	wsnp_Ex_c11939_19147602
22	1A	IWA4021	21.5	wsnp_Ex_c48407_53323483
23	1A	IWA3378	21.5	wsnp_Ex_c3201_5910659
24	1A	IWA3377	21.5	wsnp_Ex_c3201_5910642
25	1A	IWA4022	21.5	wsnp_Ex_c48407_53323801
26	1A	IWA6152	27.8	wsnp_JD_c6664_7807201
27	1A	IWA1225	66.3	wsnp_CAP8_rep_c3938_1936666
28	1A	IWA6081	66.3	wsnp_JD_c4904_6034093
29	1A	IWA1790	66.7	wsnp_Ex_c1359_2604298
30	1A	IWA5822	66.7	wsnp_JD_c13024_13129681
31	1A	IWA1195	68.8	wsnp_CAP8_c4785_2322876
32	1A	IWA691	68.8	wsnp_CAP11_c1815_982483
33	1A	IWA6091	68.8	wsnp_JD_c5144_6266384
34	1A	IWA5046	69.2	wsnp_Ex_rep_c102067_87313597
35	1A	IWA3962	69.6	wsnp_Ex_c4612_8254533
36	1A	IWA3195	69.6	wsnp_Ex_c28900_37982485
37	1A	IWA3060	69.6	wsnp_Ex_c26688_35918122
38	1A	IWA136	69.6	wsnp_BE443588A_Ta_2_2
39	1A	IWA135	69.6	wsnp_BE443588A_Ta_2_1
40	1A	IWA8334	69.6	wsnp_RFL_Contig2409_1937215
41	1A	IWA3435	70.8	wsnp_Ex_c33452_41938159
42	1A	IWA3804	70.8	wsnp_Ex_c41953_48657850
43	1A	IWA6042	70.8	wsnp_JD_c3973_5044238
44	1A	IWA3434	71.2	wsnp_Ex_c33452_41938013
45	1A	IWA3805	71.2	wsnp_Ex_c41953_48658353
46	1A	IWA1081	79.5	wsnp_CAP7_c3472_1623955
47	1A	IWA8212	82.4	wsnp_Ra_rep_c95460_83855592
48	1A	IWA2314	88.1	wsnp_Ex_c1845_3472790
49	1A	IWA601	89	wsnp_BM137879A_Ta_2_1
50	1A	IWA1979	90.3	wsnp_Ex_c15088_23268345
51	1A	Xcfa2129	94.6
52	1A	IWA2540	102.5	wsnp_Ex_c20489_29564938
53	1A	IWA931	102.5	wsnp_CAP12_c1960_972031
54	1A	IWA605	102.5	wsnp_BM140362A_Ta_2_2
55	1A	IWA4511	102.5	wsnp_Ex_c6452_11213329
56	1A	IWA6553	105.4	wsnp_Ku_c15214_23756800
57	1A	IWA7868	105.8	wsnp_Ra_c3270_6136110
58	1A	IWA7869	105.8	wsnp_Ra_c3270_6136601
59	1A	IWA6707	106.2	wsnp_Ku_c21316_31053745
60	1A	IWA6708	106.2	wsnp_Ku_c21316_31053776
61	1A	IWA5174	106.6	wsnp_Ex_rep_c109742_92411838
62	1A	IWA5777	111.4	wsnp_JD_c10777_11374000
63	1A	IWA5568	111.4	wsnp_Ex_rep_c68857_67737959
64	1A	IWA2598	111.4	wsnp_Ex_c21336_30465618
65	1A	IWA2584	111.4	wsnp_Ex_c21193_30320134
66	1A	IWA6162	111.4	wsnp_JD_c722_1080592
67	1A	IWA7018	113.5	wsnp_Ku_c39878_48218985
68	1A	IWA5277	113.5	wsnp_Ex_rep_c66628_64934660
69	1A	IWA3477	113.5	wsnp_Ex_c34344_42677360
70	1A	IWA1594	113.5	wsnp_Ex_c12165_19452361
71	1A	IWA7898	113.5	wsnp_Ra_c37745_45806931
72	1A	IWA4816	114.3	wsnp_Ex_c8588_14419007
73	1A	IWA3820	114.3	wsnp_Ex_c42282_48900922
74	1A	IWA3613	114.3	wsnp_Ex_c37470_45211843
75	1A	IWA3475	114.3	wsnp_Ex_c34344_42676379
76	1A	IWA6751	114.3	wsnp_Ku_c23926_33870364
77	1A	IWA3134	115.1	wsnp_Ex_c27940_37101775
78	1A	IWA3891	115.1	wsnp_Ex_c44263_50363536
79	1A	IWA7577	115.9	wsnp_Ra_c12148_19539667
80	1A	IWA6756	115.9	wsnp_Ku_c24239_34199356
81	1A	IWA4117	115.9	wsnp_Ex_c5192_9203682
82	1A	IWA4116	115.9	wsnp_Ex_c5192_9203100
83	1A	IWA1608	115.9	wsnp_Ex_c12336_19686808
84	1A	IWA16	115.9	wsnp_BE399999A_Ta_2_1
85	1A	IWA5740	119.3	wsnp_Ex_rep_c73818_71733737
86	1A	IWA4292	121.4	wsnp_Ex_c56097_58352130
87	1A	IWA4291	121.4	wsnp_Ex_c56097_58351893
88	1A	IWA2995	121.4	wsnp_Ex_c25734_34995416
89	1A	IWA7173	121.4	wsnp_Ku_c557_1166684
90	1A	IWA6218	121.8	wsnp_JD_c9291_10157217
91	1A	IWA7021	122.6	wsnp_Ku_c4018_7333828
92	1A	IWA4328	122.6	wsnp_Ex_c572_1138770
93	1A	IWA4326	122.6	wsnp_Ex_c572_1138339
94	1A	IWA7824	122.6	wsnp_Ra_c2895_5488879
95	1A	IWA5310	125.1	wsnp_Ex_rep_c66846_65240088
96	1A	Xgwm357	129.9
97	1A	Xbarc28	135.2
98	1A	Xgwm164	142
99	1A	IWA4061	146.3	wsnp_Ex_c49829_54319220
100	1A	IWA1934	146.3	wsnp_Ex_c14733_22819625
101	1A	IWA492	146.3	wsnp_BF478737A_Ta_2_1
102	1A	IWA8255	146.3	wsnp_RFL_Contig1736_858448
103	1A	IWA1933	147.9	wsnp_Ex_c14733_22819350
104	1A	IWA4071	147.9	wsnp_Ex_c50235_54588957
105	1A	IWA7879	150	wsnp_Ra_c34203_42948357
106	1A	IWA290	150	wsnp_BE497361A_Ta_1_1
107	1A	IWA7922	150	wsnp_Ra_c41581_48764320
108	1A	IWA1990	150.4	wsnp_Ex_c15188_23387523
109	1A	IWA3884	150.8	wsnp_Ex_c44049_50205904
110	1A	IWA5866	160.8	wsnp_JD_c15748_15112101
111	1A	IWA6431	160.8	wsnp_Ku_c11769_19153951
112	1A	IWA944	162	wsnp_CAP12_c2438_1180601
113	1A	IWA3374	162.8	wsnp_Ex_c31983_40709866
114	1A	IWA3375	162.8	wsnp_Ex_c31983_40710608
115	1A	IWA7796	163.7	wsnp_Ra_c26191_35761997
116	1A	IWA1387	169.9	wsnp_Ex_c10783_17554146
117	1A	IWA6441	169.9	wsnp_Ku_c11896_19337444
118	1A	IWA4163	170.3	wsnp_Ex_c5323_9408829
119	1A	IWA4506	173.2	wsnp_Ex_c64327_63176640
120	1A	IWA4644	183.8	wsnp_Ex_c7252_12453079
121	1A	IWA1479	183.8	wsnp_Ex_c1137_2182795
122	1A	IWA4754	183.8	wsnp_Ex_c7965_13520238
123	1A	IWA1481	184.2	wsnp_Ex_c1137_2183772
124	1A	IWA5150	197.8	wsnp_Ex_rep_c106111_90308719
125	1A	Xgwm33	204
126	1B	IWA6647	0	wsnp_Ku_c18023_27232712
127	1B	IWA2077	0	wsnp_Ex_c1597_3045682
128	1B	IWA4935	1.7	wsnp_Ex_c955_1827567
129	1B	IWA4936	1.7	wsnp_Ex_c955_1827719
130	1B	Xbarc80	3.7
131	1B	IWA7892	15	wsnp_Ra_c35998_44436619
132	1B	IWA8542	0	wsnp_RFL_Contig395_4387107
133	1B	IWA1825	0.4	wsnp_Ex_c13878_21738866
134	1B	IWA3043	1.2	wsnp_Ex_c2639_4899517
135	1B	IWA696	5.7	wsnp_CAP11_c1902_1022590
136	1B	IWA8543	5.7	wsnp_RFL_Contig3951_4390396
137	1B	IWA7422	10.2	wsnp_Ku_rep_c107952_93214466
138	1B	IWA5447	11.4	wsnp_Ex_rep_c67747_66422869
139	1B	IWA3098	11.4	wsnp_Ex_c27176_36393984
140	1B	IWA3097	11.4	wsnp_Ex_c27176_36393952
141	1B	IWA5446	11.4	wsnp_Ex_rep_c67747_66422495
142	1B	IWA7619	11.4	wsnp_Ra_c13959_21943006
143	1B	IWA5352	14	wsnp_Ex_rep_c67098_65573819
144	1B	IWA8507	14	wsnp_RFL_Contig3738_3992954
145	1B	IWA2064	16.2	wsnp_Ex_c15796_24173348
146	1B	IWA415	18.4	wsnp_BF200640B_Ta_2_1
147	1B	IWA4154	18.4	wsnp_Ex_c5296_9365847
148	1B	IWA6294	28	wsnp_JD_rep_c63201_40318622
149	1B	IWA2411	28	wsnp_Ex_c194_381656
150	1B	IWA2308	28	wsnp_Ex_c18384_27213023
151	1B	IWA255	28	wsnp_BE494527B_Ta_2_1
152	1B	IWA7037	28	wsnp_Ku_c41261_49287074
153	1B	IWA579	33.5	wsnp_BG606986B_Ta_2_1
154	1B	IWA4488	34.4	wsnp_Ex_c6378_11086366
155	1B	IWA1859	34.9	wsnp_Ex_c1412_2711077
156	1B	IWA3120	36.6	wsnp_Ex_c27644_36826484
157	1B	IWA4939	39	wsnp_Ex_c9577_15857465
158	1B	IWA2889	39	wsnp_Ex_c24318_33561600
159	1B	IWA2040	39	wsnp_Ku_c4175_7603236
160	1B	IWA6479	39	wsnp_Ku_c13043_20902807
161	1B	IWA5962	41.2	wsnp_JD_c2636_3554874
162	1B	IWA5228	41.7	wsnp_Ex_rep_c66389_64588992
163	1B	IWA3684	41.7	wsnp_Ex_c39616_46871127
164	1B	IWA5229	41.7	wsnp_Ex_rep_c66389_64589189
165	1B	IWA8111	42.1	wsnp_Ra_rep_c101899_87126448
166	1B	Xbarc61	43.9
167	1B	IWA4361	45.4	wsnp_Ex_c58292_59652859
168	1B	IWA4999	45.4	wsnp_Ex_rep_c101231_86636951
169	1B	IWA2626	45.9	wsnp_Ex_c21559_30710510
170	1B	IWA4819	45.9	wsnp_Ex_c8625_14468525
171	1B	IWA2315	46.3	wsnp_Ex_c18462_27305612
172	1B	IWA1890	46.7	wsnp_Ex_c1440_2764867
173	1B	IWA1889	46.7	wsnp_Ex_c1440_2764269
174	1B	IWA5635	46.7	wsnp_Ex_rep_c69766_68723140
175	1B	IWA6731	47.5	wsnp_Ku_c23096_32987510
176	1B	IWA6018	47.5	wsnp_JD_c35642_26554827
177	1B	IWA1231	47.5	wsnp_CAP8_rep_c4452_2170021
178	1B	IWA1005	47.5	wsnp_CAP12_rep_c4157_1894383
179	1B	IWA540	47.5	wsnp_BG274294B_Ta_2_3
180	1B	IWA6945	47.5	wsnp_Ku_c34980_44256215
181	1B	Xcfd20	50.9
182	1B	IWA5779	55.5	wsnp_JD_c11014_11565501
183	1B	IWA573	55.9	wsnp_BG606586B_Ta_2_13
184	1B	IWA3307	57.6	wsnp_Ex_c30969_39821293
185	1B	IWA491	57.6	wsnp_BF478690B_Ta_2_1
186	1B	IWA3945	57.6	wsnp_Ex_c4561_8184576
187	1B	IWA7982	58	wsnp_Ra_c5088_9081927
188	1B	IWA7787	58	wsnp_Ra_c25590_35156699
189	1B	IWA6917	58	wsnp_Ku_c33028_42580216
190	1B	IWA4204	58	wsnp_Ex_c53976_57027796
191	1B	IWA4203	58	wsnp_Ex_c53976_57027635
192	1B	IWA3476	58	wsnp_Ex_c34344_42677130
193	1B	IWA2084	58	wsnp_Ex_c1600_3051075
194	1B	IWA1959	58	wsnp_Ex_c1495_2864718
195	1B	IWA790	58	wsnp_CAP11_c6264_2895652
196	1B	IWA8281	58	wsnp_RFL_Contig2000_1193707
197	1B	IWA7560	58.4	wsnp_Ra_c11232_18256748
198	1B	Xwmc419	58.8
199	1B	IWA4557	59.2	wsnp_Ex_c6611_11452297
200	1B	IWA4556	59.2	wsnp_Ex_c6611_11451949
201	1B	IWA7017	59.2	wsnp_Ku_c39862_48205590
202	1B	IWA6073	61.3	wsnp_JD_c4641_5774711
203	1B	IWA4198	61.3	wsnp_Ex_c5388_9527189
204	1B	IWA4197	61.3	wsnp_Ex_c5388_9526777
205	1B	IWA890	61.3	wsnp_CAP11_rep_c8576_3700031
206	1B	IWA189	61.3	wsnp_BE446240B_Ta_2_3
207	1B	IWA188	61.3	wsnp_BE446240B_Ta_2_1
208	1B	IWA7594	61.3	wsnp_Ra_c12888_20519578
209	1B	IWA8081	61.7	wsnp_Ra_c8484_14372772
210	1B	IWA7723	61.7	wsnp_Ra_c2027_3945764
211	1B	IWA7722	61.7	wsnp_Ra_c2027_3945713
212	1B	IWA7721	61.7	wsnp_Ra_c2027_3943938
213	1B	IWA7119	61.7	wsnp_Ku_c4951_8856170
214	1B	IWA6063	61.7	wsnp_JD_c4485_5618761
215	1B	IWA5665	61.7	wsnp_Ex_rep_c69986_68942866
216	1B	IWA5664	61.7	wsnp_Ex_rep_c69986_68942834
217	1B	IWA5348	61.7	wsnp_Ex_rep_c67036_65492436
218	1B	IWA4811	61.7	wsnp_Ex_c852_1657319
219	1B	IWA3588	61.7	wsnp_Ex_c3681_6716255
220	1B	IWA3587	61.7	wsnp_Ex_c3681_6715277
221	1B	IWA3502	61.7	wsnp_Ex_c34966_43196962
222	1B	IWA2517	61.7	wsnp_Ex_c2025_3799847
223	1B	IWA2221	61.7	wsnp_Ex_c17452_26163465
224	1B	IWA1109	61.7	wsnp_CAP7_c940_480745
225	1B	IWA767	61.7	wsnp_CAP11_c4558_2144436
226	1B	IWA141	61.7	wsnp_BE443930B_Ta_2_2
227	1B	IWA128	61.7	wsnp_BE443332B_Ta_2_2
228	1B	IWA1121	61.7	wsnp_CAP7_rep_c5502_2471298
229	1B	IWA8082	61.7	wsnp_Ra_c8484_14372815
230	1B	IWA8148	63.3	wsnp_Ra_rep_c111777_93910754
231	1B	IWA6891	64.1	wsnp_Ku_c30982_40765341
232	1B	IWA6890	64.1	wsnp_Ku_c30982_40765254
233	1B	IWA6259	64.1	wsnp_JD_rep_c49357_33576509
234	1B	IWA3631	64.1	wsnp_Ex_c38116_45719983
235	1B	IWA7977	64.1	wsnp_Ra_c49942_54740532
236	1B	IWA4975	64.5	wsnp_Ex_c9902_16309166
237	1B	IWA3620	64.5	wsnp_Ex_c37635_45347415
238	1B	IWA8619	64.5	wsnp_RFL_Contig4726_5654774
239	1B	IWA8392	64.9	wsnp_RFL_Contig2794_2564017
240	1B	IWA8338	64.9	wsnp_RFL_Contig2449_2013497
241	1B	IWA7219	64.9	wsnp_Ku_c62848_63784645
242	1B	IWA6703	64.9	wsnp_Ku_c2115_4089288
243	1B	IWA5681	64.9	wsnp_Ex_rep_c70284_69228305
244	1B	IWA5593	64.9	wsnp_Ex_rep_c69266_68192954
245	1B	IWA4389	64.9	wsnp_Ex_c5947_10431109
246	1B	IWA1451	64.9	wsnp_Ex_c11177_18096010
247	1B	IWA8506	64.9	wsnp_RFL_Contig373_3974834
248	1B	IWA406	67	wsnp_BE637971B_Ta_1_20
249	1B	IWA435	67	wsnp_BF291549B_Ta_1_1
250	1B	IWA466	67	wsnp_BF473056D_Ta_2_1
251	1B	IWA974	67	wsnp_CAP12_c55_32598
252	1B	IWA1191	67	wsnp_CAP8_c4576_2228073
253	1B	IWA1399	67	wsnp_Ex_c10869_17671164
254	1B	IWA1566	67	wsnp_Ex_c11976_19193550
255	1B	IWA1957	67	wsnp_Ex_c1493_2860766
256	1B	IWA1958	67	wsnp_Ex_c1493_2862065
257	1B	IWA1991	67	wsnp_Ex_c15188_23387754
258	1B	IWA2561	67	wsnp_Ex_c20975_30093113
259	1B	IWA2655	67	wsnp_Ex_c2181_4089639
260	1B	IWA2881	67	wsnp_Ex_c24176_33424905
261	1B	IWA3115	67	wsnp_Ex_c2749_5091813
262	1B	IWA3155	67	wsnp_Ex_c28287_37424983
263	1B	IWA3690	67	wsnp_Ex_c39661_46902689
264	1B	IWA3875	67	wsnp_Ex_c43586_49862663
265	1B	IWA4350	67	wsnp_Ex_c5780_10154132
266	1B	IWA4555	67	wsnp_Ex_c66106_64268316
267	1B	IWA4715	67	wsnp_Ex_c7705_13139890
268	1B	IWA4764	67	wsnp_Ex_c8052_13645549
269	1B	IWA4974	67	wsnp_Ex_c9872_16271161
270	1B	IWA5133	67	wsnp_Ex_rep_c105244_89727546
271	1B	IWA5370	67	wsnp_Ex_rep_c67198_65702998
272	1B	IWA5435	67	wsnp_Ex_rep_c67665_66326492
273	1B	IWA5691	67	wsnp_Ex_rep_c70345_69290532
274	1B	IWA5702	67	wsnp_Ex_rep_c70593_69508988
275	1B	IWA5976	67	wsnp_JD_c2805_3748370
276	1B	IWA6062	67	wsnp_JD_c4444_5575748
277	1B	IWA6110	67	wsnp_JD_c5757_6915127
278	1B	IWA6129	67	wsnp_JD_c626_945114
279	1B	IWA6260	67	wsnp_JD_rep_c49359_33578909
280	1B	IWA6444	67	wsnp_Ku_c11955_19422034
281	1B	IWA6448	67	wsnp_Ku_c11987_19472688
282	1B	IWA6450	67	wsnp_Ku_c11987_19473636
283	1B	IWA6541	67	wsnp_Ku_c14842_23275194
284	1B	IWA6610	67	wsnp_Ku_c16938_25916260
285	1B	IWA6611	67	wsnp_Ku_c16938_25916279
286	1B	IWA6621	67	wsnp_Ku_c17177_26216230
287	1B	IWA6836	67	wsnp_Ku_c28164_38103270
288	1B	IWA6964	67	wsnp_Ku_c3695_6810121
289	1B	IWA7059	67	wsnp_Ku_c4373_7947422
290	1B	IWA7151	67	wsnp_Ku_c52464_57427549
291	1B	IWA7331	67	wsnp_Ku_c8592_14575931
292	1B	IWA7385	67	wsnp_Ku_rep_c101863_88951284
293	1B	IWA7605	67	wsnp_Ra_c13316_21100830
294	1B	IWA8001	67	wsnp_Ra_c5485_9703900
295	1B	IWA8199	67	wsnp_Ra_rep_c74968_72704437
296	1B	IWA8409	67	wsnp_RFL_Contig295_2803175
297	1B	IWA764	67	wsnp_CAP11_c3968_1874257
298	1B	IWA7399	67	wsnp_Ku_rep_c103074_89905152
299	1B	IWA3123	67.4	wsnp_Ex_c27739_36913084
300	1B	IWA7398	67.4	wsnp_Ku_rep_c103074_89904851
301	1B	Xbarc185	70.9
302	1B	Xbarc17	73.5
303	1B	Xgwm11	73.5
304	1B	Xbarc152	75.5
305	1B	Xgwm339.2	79.2
306	1B	Xgwm18	93.8
307	1D	IWA4716	0	wsnp_Ex_c7705_13141187
308	1D	IWA7533	0	wsnp_Ra_c1020_2062200
309	1D	IWA7797	4.8	wsnp_Ra_c2633_5017265
310	1D	IWA1773	5.2	wsnp_Ex_c13421_21142520
311	1D	IWA2449	6	wsnp_Ex_c1969_3705930
312	1D	IWA1397	6	wsnp_Ex_c1085_2078944
313	1D	IWA2268	6	wsnp_Ex_c17884_26647833
314	1D	IWA7968	6	wsnp_Ra_c48124_53475145
315	1D	IWA7967	6	wsnp_Ra_c48124_53475114
316	1D	IWA6487	6	wsnp_Ku_c13229_21141168
317	1D	IWA1396	6	wsnp_Ex_c1085_2078686
318	1D	IWA407	6	wsnp_BE637971D_Ta_2_3
319	1D	Xwmc432	7.4
320	1D	Xwmc44	12.3
321	1D	IWA5020	0	wsnp_Ex_rep_c101500_86856679
322	1D	IWA5019	0	wsnp_Ex_rep_c101500_86856438
323	1D	IWA5018	0	wsnp_Ex_rep_c101500_86856089
324	1D	IWA4598	0	wsnp_Ex_c6974_12025571
325	1D	IWA362	0	wsnp_BE586140D_Ta_2_2
326	1D	IWA57	0	wsnp_BE405518D_Ta_2_3
327	1D	IWA980	1.7	wsnp_CAP12_c633_339740
328	1D	IWA830	1.7	wsnp_CAP11_rep_c4017_1896951
329	1D	IWA642	1.7	wsnp_CAP11_c1043_618449
330	1D	IWA1221	1.7	wsnp_CAP8_rep_c3713_1832742
331	1D	IWA5357	5
332	1D	IWA3446	13.4	wsnp_Ex_c3372_6195001
333	1D	Xwmc429	22.1
334	1D	IWA3481	31.9	wsnp_Ex_c3450_6323939
335	1D	IWA7154	36.6	wsnp_Ku_c53270_57959459
336	1D	IWA342	49.3	wsnp_BE517805D_Ta_1_1
337	2A	Xbarc219.2	0
338	2A	Xgwm537	4
339	2A	Xwmc407	5.3
340	2A	Xwmc597	5.3
341	2A	IWA4989	7.4	wsnp_Ex_c997_1906900
342	2A	IWA6922	7.8	wsnp_Ku_c33374_42877546
343	2A	IWA6745	7.8	wsnp_Ku_c23598_33524490
344	2A	IWA6481	7.8	wsnp_Ku_c13068_20937906
345	2A	IWA6391	7.8	wsnp_Ku_c10418_17237935
346	2A	IWA5423	7.8	wsnp_Ex_rep_c67619_66272209
347	2A	IWA5342	7.8	wsnp_Ex_rep_c66982_65424216
348	2A	IWA5341	7.8	wsnp_Ex_rep_c66982_65424063
349	2A	IWA5340	7.8	wsnp_Ex_rep_c66982_65423289
350	2A	IWA4990	7.8	wsnp_Ex_c997_1906952
351	2A	IWA3469	7.8	wsnp_Ex_c342_670415
352	2A	IWA3468	7.8	wsnp_Ex_c342_670243
353	2A	IWA3143	7.8	wsnp_Ex_c28133_37275403
354	2A	IWA2428	7.8	wsnp_Ex_c19516_28483751
355	2A	IWA2427	7.8	wsnp_Ex_c19516_28483050
356	2A	IWA2426	7.8	wsnp_Ex_c19516_28482852
357	2A	IWA2425	7.8	wsnp_Ex_c19516_28481857
358	2A	IWA2424	7.8	wsnp_Ex_c19516_28480964
359	2A	IWA1830	7.8	wsnp_Ex_c13945_21824927
360	2A	IWA1563	7.8	wsnp_Ex_c11950_19164191
361	2A	IWA1562	7.8	wsnp_Ex_c11950_19164041
362	2A	IWA1512	7.8	wsnp_Ex_c11560_18632777
363	2A	IWA1511	7.8	wsnp_Ex_c11560_18632698
364	2A	IWA3382	9.4	wsnp_Ex_c322_624793
365	2A	IWA6090	57	wsnp_JD_c514_782019
366	2A	IWA6089	57	wsnp_JD_c514_781859
367	2A	IWA5574	57	wsnp_Ex_rep_c69014_67914888
368	2A	IWA5449	57	wsnp_Ex_rep_c67751_66428606
369	2A	IWA5409	57	wsnp_Ex_rep_c67530_66144244
370	2A	IWA3718	57	wsnp_Ex_c40280_47375312
371	2A	IWA3199	57	wsnp_Ex_c28942_38018762
372	2A	IWA6270	57	wsnp_JD_rep_c50243_34277175
373	2A	IWA5130	61.3	wsnp_Ex_rep_c105158_89662129
374	2A	IWA4562	64.7	wsnp_Ex_c6660_11526924
375	2A	IWA5244	73.1	wsnp_Ex_rep_c66465_64708722
376	2A	IWA7998	73.1	wsnp_Ra_c5443_9643191
377	2A	IWA4733	74.3	wsnp_Ex_c7829_13320760
378	2A	IWA3597	74.3	wsnp_Ex_c37089_44908383
379	2A	IWA2092	74.3	wsnp_Ex_c1604_3060855
380	2A	IWA1275	74.3	wsnp_Ex_c10084_16572374
381	2A	IWA542	74.3	wsnp_BG274584A_Ta_2_4
382	2A	IWA541	74.3	wsnp_BG274584A_Ta_2_1
383	2A	IWA8377	75.5	wsnp_RFL_Contig2729_2446041
384	2A	IWA2640	76.3	wsnp_Ex_c21709_30869795
385	2A	IWA4375	84.1	wsnp_Ex_c59095_60108185
386	2A	IWA2157	84.1	wsnp_Ex_c16627_25162391
387	2A	IWA7864	84.1	wsnp_Ra_c32271_41304469
388	2A	IWA970	85.7	wsnp_Ex_c16963_25554400
389	2A	IWA8157	85.7	wsnp_Ra_rep_c69398_66825550
390	2A	Xgwm295	90.6
391	2A	Xwmc181	112.2
392	2A	IWA1539	119.4	wsnp_Ex_c11827_18986376
393	2A	IWA684	119.4	wsnp_CAP11_c1711_934478
394	2A	IWA3752	119.4	wsnp_Ex_c41007_47932833
395	2A	IWA5066	119.8	wsnp_Ex_rep_c102390_87572532
396	2A	IWA6931	119.8	wsnp_Ku_c33884_43306422
397	2A	IWA8040	125.5	wsnp_Ra_c66636_64922359
398	2A	IWA6548	125.5	wsnp_Ku_c15077_23576078
399	2A	IWA5686	125.5	wsnp_Ex_rep_c70299_69243835
400	2A	IWA5685	125.5	wsnp_Ex_rep_c70299_69243401
401	2A	IWA3243	125.5	wsnp_Ex_c29618_38626291
402	2A	IWA8041	125.5	wsnp_Ra_c66636_64923321
403	2A	IWA227	136.8	wsnp_Ex_c10234_16787859
404	2A	IWA7761	139.7	wsnp_Ra_c22610_32088836
405	2A	IWA5271	142.2	wsnp_Ex_rep_c66606_64905694
406	2A	IWA6798	145.6	wsnp_Ku_c26323_36285697
407	2A	IWA6797	145.6	wsnp_Ku_c26323_36285601
408	2A	IWA2602	145.6	wsnp_Ex_c2137_4014383
409	2A	IWA2601	145.6	wsnp_Ex_c2137_4014287
410	2A	IWA2600	145.6	wsnp_Ex_c2137_4013681
411	2A	IWA8036	145.6	wsnp_Ra_c6586_11477949
412	2A	IWA2555	149	wsnp_Ex_c20771_29858497
413	2A	Xgdm94	152.4
414	2A	IWA4658	164.3	wsnp_Ex_c73454_71499715
415	2A	IWA5082	165	wsnp_Ex_rep_c103072_88111184
416	2A	IWA3809	165	wsnp_Ex_c4204_7594348
417	2A	IWA5364	165	wsnp_Ex_rep_c67149_65635258
418	2A	IWA4461	165.6	wsnp_Ex_c62466_62094300
419	2A	IWA4460	165.6	wsnp_Ex_c62466_62093988
420	2A	IWA4459	165.6	wsnp_Ex_c62466_62093712
421	2A	IWA4458	165.6	wsnp_Ex_c62466_62093520
422	2A	IWA3688	165.6	wsnp_Ex_c3964_7181151
423	2A	IWA4192	165.6	wsnp_Ex_c53729_56868062
424	2A	IWA2777	165.6	wsnp_Ex_c2311_4327441
425	2A	IWA1322	165.6	wsnp_Ex_c10411_17037327
426	2A	IWA966	165.6	wsnp_CAP12_c4611_2104718
427	2A	IWA7885	165.6	wsnp_Ra_c35335_43895883
428	2A	IWA6963	166.8	wsnp_Ku_c3688_6797159
429	2A	IWA5879	166.8	wsnp_JD_c16948_15934352
430	2A	IWA4664	166.8	wsnp_Ex_c7366_12630537
431	2A	IWA4463	166.8	wsnp_Ex_c62466_62094459
432	2A	IWA3687	166.8	wsnp_Ex_c3964_7181070
433	2A	IWA2778	166.8	wsnp_Ex_c2311_4327681
434	2A	IWA7327	166.8	wsnp_Ku_c850_1758318
435	2A	IWA5978	168.8	wsnp_JD_c289_450995
436	2A	IWA5759	169.3	wsnp_Ex_rep_c90786_81061397
437	2A	Xgwm382	171.4
438	2A	Xgwm382.2	171.4
439	2A	Xgwm361	175.1
440	2B	IWA7456	0	wsnp_Ku_rep_c69632_69044288
441	2B	IWA5716	0	wsnp_Ex_rep_c70934_69795145
442	2B	IWA8325	1.1	wsnp_RFL_Contig2324_1803878
443	2B	IWA6851	1.6	wsnp_Ku_c28820_38731047
444	2B	IWA2946	1.6	wsnp_Ex_c25043_34305764
445	2B	Xbarc159	6.4
446	2B	IWA988	9.4	wsnp_Ex_c174_340829
447	2B	IWA1667	10.7	wsnp_Ex_c12675_20144479
448	2B	IWA8504	21.8	wsnp_RFL_Contig3712_3953814
449	2B	IWA3982	21.8	wsnp_Ex_c4690_8386386
450	2B	IWA8055	23.1	wsnp_Ra_c7049_12224017
451	2B	IWA746	23.1	wsnp_CAP11_c3226_1588070
452	2B	IWA6656	27.4	wsnp_Ku_c18587_27915541
453	2B	IWA1535	27.4	wsnp_Ex_c11758_18896434
454	2B	IWA3594	30.8	wsnp_Ex_c3695_6740063
455	2B	IWA5738	34.9	wsnp_Ex_rep_c72569_70908990
456	2B	Xgwm526	38.1
457	2B	Xwmc149	42.9
458	2B	Xwmc361	44.2
459	2B	Xwmc369.3	46.1
460	2B	Xwmc317.2	48.7
461	2B	Xwmc318	58.7
462	2B	Xbarc129	64.8
463	2B	IWA8589	97	wsnp_RFL_Contig4402_5154408
464	2B	IWA571	97.9	wsnp_BG605258B_Ta_2_7
465	2B	IWA7113	102.6	wsnp_Ku_c48694_54811423
466	2B	IWA7112	102.6	wsnp_Ku_c48694_54811376
467	2B	IWA5809	105.5	wsnp_JD_c12346_12606967
468	2B	IWA5810	105.5	wsnp_JD_c12346_12607102
469	2B	IWA2343	105.5	wsnp_Ex_c18686_27560445
470	2B	IWA3714	105.9	wsnp_Ex_c4024_7278036
471	2B	IWA3010	106.3	wsnp_Ex_c25943_35203857
472	2B	IWA1599	106.3	wsnp_Ex_c12223_19533198
473	2B	IWA5460	107.1	wsnp_Ex_rep_c67838_66536117
474	2B	IWA8406	108	wsnp_RFL_Contig2914_2757372
475	2B	IWA2052	108	wsnp_Ex_c15681_24015996
476	2B	Xwmc628	110.4
477	2B	Xwmc332	111.2
478	2B	IWA3938	115	wsnp_Ex_c45468_51254978
479	2B	IWA3937	115	wsnp_Ex_c45468_51254832
480	2B	IWA1765	120.2	wsnp_Ex_c13353_21046550
481	2B	IWA2459	120.2	wsnp_Ex_c19772_28771627
482	2B	IWA3233	120.2	wsnp_Ex_c29382_38422739
483	2B	IWA5024	120.2	wsnp_Ex_rep_c101581_86924089
484	2B	IWA7955	120.2	wsnp_Ra_c4660_8405634
485	2B	IWA638	120.2	wsnp_BQ172173B_Ta_2_2
486	2B	IWA1292	122.2	wsnp_Ex_c1016_1943573
487	2B	IWA1293	122.2	wsnp_Ex_c1016_1943827
488	2B	IWA5051	122.2	wsnp_Ex_rep_c102127_87360034
489	2B	IWA1291	122.2	wsnp_Ex_c1016_1943126
490	2B	IWA7652	122.7	wsnp_Ra_c16333_24961476
491	2B	IWA2676	123.9	wsnp_Ex_c2203_4129271
492	2B	IWA2702	123.9	wsnp_Ex_c22271_31463467
493	2B	IWA3148	123.9	wsnp_Ex_c2819_5213149
494	2B	IWA4095	123.9	wsnp_Ex_c5123_9087869
495	2B	IWA4097	123.9	wsnp_Ex_c5123_9089025
496	2B	IWA4866	123.9	wsnp_Ex_c9025_15039930
497	2B	IWA2179	123.9	wsnp_Ex_c16948_25537916
498	2B	IWA2379	124.3	wsnp_Ex_c1915_3618286
499	2B	IWA2677	124.3	wsnp_Ex_c2203_4129457
500	2B	IWA2678	124.3	wsnp_Ex_c2203_4130096
501	2B	IWA2701	124.3	wsnp_Ex_c22271_31463382
502	2B	IWA4096	124.3	wsnp_Ex_c5123_9088111
503	2B	IWA4098	124.3	wsnp_Ex_c5123_9089624
504	2B	IWA4900	124.3	wsnp_Ex_c9345_15516291
505	2B	IWA4909	124.3	wsnp_Ex_c942_1806632
506	2B	IWA5177	124.3	wsnp_Ex_rep_c110284_92725051
507	2B	IWA7371	124.3	wsnp_Ku_c9901_16493072
508	2B	IWA2158	124.3	wsnp_Ex_c16627_25162803
509	2B	IWA6122	126.8	wsnp_JD_c6010_7167159
510	2B	IWA7620	126.8	wsnp_Ra_c13963_21949302
511	2B	IWA8295	126.8	wsnp_RFL_Contig2123_1397739
512	2B	IWA6121	126.8	wsnp_JD_c6010_7167084
513	2B	IWA8195	134.7	wsnp_Ra_rep_c74497_72390803
514	2B	IWA7850	139.1	wsnp_Ra_c31353_40494768
515	2B	IWA933	139.1	wsnp_CAP12_c197_110707
516	2B	IWA1389	140.4	wsnp_Ex_c10796_17575074
517	2B	IWA4890	140.4	wsnp_Ex_c922_1775246
518	2B	IWA4948	140.4	wsnp_Ex_c9628_15927045
519	2B	IWA544	140.4	wsnp_BG274584B_Ta_2_3
520	2B	IWA2131	141.7	wsnp_Ex_c16425_24923837
521	2B	IWA2924	141.7	wsnp_Ex_c24711_33964543
522	2B	IWA2130	141.7	wsnp_Ex_c16425_24923685
523	2B	IWA2261	142.5	wsnp_Ex_c17845_26604587
524	2B	IWA5413	142.5	wsnp_Ex_rep_c67561_66188180
525	2B	IWA5414	142.5	wsnp_Ex_rep_c67561_66189279
526	2B	IWA469	142.5	wsnp_BF473744B_Ta_2_1
527	2B	IWA6076	144.2	wsnp_JD_c47318_32176833
528	2B	IWA3973	144.2	wsnp_Ex_c46576_52042185
529	2B	IWA6047	144.7	wsnp_JD_c4243_5350869
530	2B	IWA5513	147.4	wsnp_Ex_rep_c68194_66973531
531	2B	IWA5512	147.4	wsnp_Ex_rep_c68194_66973114
532	2B	IWA5397	148.2	wsnp_Ex_rep_c67411_65994109
533	2B	IWA4256	148.2	wsnp_Ex_c54998_57670603
534	2B	IWA2950	148.6	wsnp_Ex_c2510_4689918
535	2B	IWA2237	148.6	wsnp_Ex_c1758_3326792
536	2B	IWA6453	149	wsnp_Ku_c12037_19549078
537	2B	IWA4275	150.1	wsnp_Ex_c55735_58127324
538	2B	IWA4636	150.6	wsnp_Ex_c7203_12370983
539	2B	IWA5411	150.6	wsnp_Ex_rep_c67543_66165372
540	2B	IWA2294	150.6	wsnp_Ex_c18261_27078080
541	2B	Xbarc101	153.8
542	2B	Xwmc441	159.2
543	2B	Xgwm133	175.8
544	2B	Xgwm3.2	175.8
545	2B	Xgwm60	175.8
546	2B	Xgwm130	175.8
547	2B	Xgwm47	176.2
548	2B	IWA6216	201.5	wsnp_JD_c9251_10121369
549	2B	IWA5290	201.5	wsnp_Ex_rep_c66700_65028839
550	2B	IWA2349	202.3	wsnp_Ex_c18750_27627600
551	2B	IWA3942	202.3	wsnp_Ex_c45595_51343969
552	2B	IWA4822	202.3	wsnp_Ex_c8641_14485630
553	2B	IWA7215	202.3	wsnp_Ku_c6183_10867720
554	2B	IWA8112	202.3	wsnp_Ra_rep_c103071_87770006
555	2B	IWA671	202.3	wsnp_CAP11_c1436_808089
556	2B	IWA4107	203.1	wsnp_Ex_c5172_9167324
557	2B	IWA4982	203.1	wsnp_Ex_c9932_16354389
558	2B	IWA6265	203.1	wsnp_JD_rep_c49813_33962513
559	2B	IWA4106	203.1	wsnp_Ex_c51661_55533018
560	2B	IWA5256	203.5	wsnp_Ex_rep_c66524_64799410
561	2B	IWA5168	203.5	wsnp_Ex_rep_c108679_91802578
562	2B	IWA1914	220.9	wsnp_Ex_c14595_22634031
563	2B	IWA3924	221.8	wsnp_Ex_c45094_50985067
564	2B	IWA4894	221.8	wsnp_Ex_c9248_15372536
565	2B	IWA10	221.8	wsnp_BE399688B_Ta_2_1
566	2B	IWA3126	224.3	wsnp_Ex_c27867_37030229
567	2B	IWA3127	224.3	wsnp_Ex_c27867_37030045
568	2B	IWA6509	224.3	wsnp_Ku_c13905_22034406
569	2B	IWA7661	224.3	wsnp_Ra_c16822_25566950
570	2B	IWA1763	224.3	wsnp_Ex_c13351_21042379
571	2B	IWA5240	224.7	wsnp_Ex_rep_c66448_64683704
572	2B	IWA7076	224.7	wsnp_Ku_c4507_8157580
573	2B	IWA1204	224.7	wsnp_CAP8_c630_456418
574	2B	IWA5377	225.5	wsnp_Ex_rep_c67257_65786614
575	2B	IWA6427	225.5	wsnp_Ku_c11665_18999583
576	2B	IWA328	225.5	wsnp_BE499478B_Ta_2_1
577	2B	IWA2671	226.3	wsnp_Ex_c22010_31185837
578	2B	IWA4323	226.7	wsnp_Ex_c57_116914
579	2B	IWA607	227.9	wsnp_BM140364B_Ta_2_1
580	2B	IWA608	227.9	wsnp_BM140364B_Ta_2_3
581	2B	IWA762	227.9	wsnp_CAP11_c3947_1866837
582	2B	IWA763	227.9	wsnp_CAP11_c3947_1867089
583	2B	IWA1114	227.9	wsnp_CAP7_rep_c12606_5316797
584	2B	IWA1664	227.9	wsnp_Ex_c12671_20140014
585	2B	IWA1665	227.9	wsnp_Ex_c12671_20140295
586	2B	IWA2312	227.9	wsnp_Ex_c18418_27251563
587	2B	IWA2556	227.9	wsnp_Ex_c20786_29874875
588	2B	IWA2557	227.9	wsnp_Ex_c20786_29875033
589	2B	IWA2887	227.9	wsnp_Ex_c2430_4546479
590	2B	IWA3080	227.9	wsnp_Ex_c269_517710
591	2B	IWA3081	227.9	wsnp_Ex_c269_518324
592	2B	IWA3329	227.9	wsnp_Ex_c31274_40086873
593	2B	IWA3564	227.9	wsnp_Ex_c3614_6602465
594	2B	IWA3824	227.9	wsnp_Ex_c42316_48926687
595	2B	IWA4456	227.9	wsnp_Ex_c62404_62055681
596	2B	IWA4531	227.9	wsnp_Ex_c6537_11338763
597	2B	IWA4532	227.9	wsnp_Ex_c6537_11339130
598	2B	IWA4655	227.9	wsnp_Ex_c7324_12561727
599	2B	IWA5560	227.9	wsnp_Ex_rep_c68704_67559626
600	2B	IWA5916	227.9	wsnp_JD_c20720_18369335
601	2B	IWA7029	227.9	wsnp_Ku_c4042_7375053
602	2B	IWA8182	227.9	wsnp_Ra_rep_c71728_69843225
603	2B	IWA295	227.9	wsnp_BE497494B_Ta_2_1
604	2B	IWA5753	228.3	wsnp_Ex_rep_c81490_76243612
605	2B	IWA6364	229.9	wsnp_JG_c609_370792
606	2B	IWA8381	230.9	wsnp_RFL_Contig2744_2471775
607	2B	IWA4135	232.4	wsnp_Ex_c5239_9272511
608	2B	IWA4673	232.4	wsnp_Ex_c741_1456698
609	2B	IWA5392	232.4	wsnp_Ex_rep_c67391_65971023
610	2B	IWA5818	232.4	wsnp_JD_c12687_12877994
611	2B	IWA6069	232.4	wsnp_JD_c4621_5757093
612	2B	IWA6070	232.4	wsnp_JD_c4621_5757201
613	2B	IWA3328	232.4	wsnp_Ex_c31262_40077397
614	2B	Xgwm148	234.8
615	2B	Xbarc183.2	239.8
616	2B	Xbarc22.1	253.2
617	2B	Xgwm429	262.3
618	2B	IWA6893	265.3	wsnp_Ku_c31_62657
619	2B	IWA6943	265.3	wsnp_Ku_c34759_44069854
620	2B	IWA6026	265.3	wsnp_JD_c3732_4781170
621	2B	IWA2572	273.1	wsnp_Ex_c21092_30220702
622	2B	IWA2571	273.1	wsnp_Ex_c21092_30220342
623	2B	IWA1093	273.5	wsnp_CAP7_c4904_2198084
624	2B	IWA1360	278.3	wsnp_Ex_c10596_17293363
625	2B	IWA2391	278.3	wsnp_Ex_c19260_28187434
626	2B	IWA1359	278.3	wsnp_Ex_c10596_17293192
627	2B	IWA4284	283.1	wsnp_Ex_c56027_58306755
628	2B	IWA2116	283.9	wsnp_Ex_c163_320858
629	2B	IWA4285	283.9	wsnp_Ex_c56027_58308093
630	2B	IWA5410	283.9	wsnp_Ex_rep_c67542_66164609
631	2B	IWA6048	283.9	wsnp_JD_c42879_30043973
632	2B	IWA6085	283.9	wsnp_JD_c5064_6183978
633	2B	IWA6184	283.9	wsnp_JD_c8085_9129899
634	2B	IWA2115	283.9	wsnp_Ex_c163_320267
635	2B	IWA1930	284.3	wsnp_Ex_c14711_22788586
636	2B	IWA5708	284.3	wsnp_Ex_rep_c70756_69644826
637	2B	IWA1929	284.3	wsnp_Ex_c14711_22788263
638	2B	IWA7697	290.9	wsnp_Ra_c19083_28215239
639	2B	Xwmc154.1	296.2
640	2B	Xwmc25.2	300.8
641	2B	IWA8152	306.8	wsnp_Ra_rep_c117300_96881829
642	2B	IWA8124	307.4	wsnp_Ra_rep_c106119_89961852
643	2B	IWA3723	307.4	wsnp_Ex_c40567_47599129
644	2B	IWA749	312.2	wsnp_CAP11_c3271_1608092
645	2B	IWA5137	312.2	wsnp_Ex_rep_c105401_89840110
646	2B	IWA2988	322.6	wsnp_Ex_c25688_34949297
647	2B	IWA2973	332.8	wsnp_Ex_c25445_34710489
648	2B	IWA3407	335.1	wsnp_Ex_c326_636368
649	2B	IWA4723	335.1	wsnp_Ex_c7776_13247365
650	2B	IWA4724	335.1	wsnp_Ex_c7776_13247654
651	2B	IWA4808	335.1	wsnp_Ex_c851_1654297
652	2B	IWA2482	335.1	wsnp_Ex_c1996_3754394
653	2B	IWA7656	335.9	wsnp_Ra_c1660_3275687
654	2B	IWA6138	335.9	wsnp_JD_c640_960796
655	2B	IWA6263	341.2	wsnp_JD_rep_c49438_33652663
656	2B	IWA4953	343.3	wsnp_Ex_c9706_16040258
657	2B	Xwmc382.1	346.8
658	2D	IWA5252	0	wsnp_Ex_rep_c66522_64795143
659	2D	IWA4367	11.1	wsnp_Ex_c5856_10276064
660	2D	IWA8149	12.4	wsnp_Ra_rep_c112625_94438013
661	2D	IWA2566	12.4	wsnp_Ex_c2100_3937914
662	2D	IWA8153	12.4	wsnp_Ra_rep_c69210_66556925
663	2D	IWA8205	12.9	wsnp_Ra_rep_c77617_74362163
664	2D	IWA7840	12.9	wsnp_Ra_c3057_5773050
665	2D	IWA7839	12.9	wsnp_Ra_c3057_5773026
666	2D	IWA7055	12.9	wsnp_Ku_c4319_7848197
667	2D	IWA7054	12.9	wsnp_Ku_c4319_7847988
668	2D	IWA5919	12.9	wsnp_JD_c20871_18460063
669	2D	IWA5918	12.9	wsnp_JD_c20871_18460030
670	2D	IWA5630	12.9	wsnp_Ex_rep_c69692_68648376
671	2D	IWA5629	12.9	wsnp_Ex_rep_c69692_68647994
672	2D	IWA5628	12.9	wsnp_Ex_rep_c69692_68647924
673	2D	IWA5206	12.9	wsnp_Ex_rep_c66348_64527919
674	2D	IWA5205	12.9	wsnp_Ex_rep_c66348_64527084
675	2D	IWA1385	12.9	wsnp_Ex_c10751_17505459
676	2D	IWA1083	12.9	wsnp_CAP7_c3635_1688824
677	2D	IWA840	12.9	wsnp_CAP11_rep_c4111_1943544
678	2D	IWA839	12.9	wsnp_CAP11_rep_c4111_1943520
679	2D	Xwmc41	15.6
680	2D	Xcfd44	43.7
681	2D	IWA8293	55.5	wsnp_RFL_Contig2104_1368653
682	2D	IWA3849	55.5	wsnp_Ex_c42970_49408712
683	2D	IWA2711	55.5	wsnp_Ex_c2240_4197532
684	2D	IWA553	55.5	wsnp_BG313738D_Ta_2_1
685	2D	IWA230	55.5	wsnp_BE490384D_Ta_1_2
686	2D	IWA229	55.5	wsnp_BE490384D_Ta_1_1
687	2D	IWA4108	55.9	wsnp_Ex_c5177_9174930
688	2D	IWA3976	55.9	wsnp_Ex_c46666_52102968
689	2D	IWA7629	55.9	wsnp_Ra_c146_314838
690	2D	IWA3848	56.7	wsnp_Ex_c42970_49408553
691	2D	IWA1440	57.5	wsnp_Ex_c11127_18033163
692	2D	IWA2631	57.5	wsnp_Ex_c21593_30744815
693	2D	IWA1975	0	wsnp_Ex_c15048_23219416
694	2D	IWA2415	0	wsnp_Ex_c1944_3664205
695	2D	IWA2414	0.5	wsnp_Ex_c1944_3663988
696	2D	IWA6452	2.8	wsnp_Ku_c12022_19520410
697	2D	IWA7418	3.3	wsnp_Ku_rep_c105822_91859983
698	2D	IWA7273	3.3	wsnp_Ku_c7229_12491877
699	2D	IWA6374	3.3	wsnp_Ku_c1016_2065367
700	2D	IWA609	3.3	wsnp_BM140538D_Ta_2_1
701	2D	IWA7435	3.3	wsnp_Ku_rep_c68228_67133195
702	2D	IWA3248	3.8	wsnp_Ex_c29666_38670435
703	2D	IWA563	4.8	wsnp_BG314532D_Ta_1_1
704	2D	IWA209	5.4	wsnp_BE488779D_Ta_1_2
705	2D	IWA144	8.6	wsnp_BE444144D_Ta_1_1
706	2D	Xgwm102.2	14.7
707	2D	Xwmc453	20.1
708	2D	Xgwm132.2	68.9
709	2D	Xwmc25.1	76.4
710	2D	Xgwm296.2	81.8
711	2D	Xgwm455	85.3
712	2D	IWA6156	89	wsnp_JD_c69_109951
713	2D	IWA5344	90	wsnp_Ex_rep_c67011_65463819
714	2D	IWA4354	90	wsnp_Ex_c58019_59494143
715	2D	IWA1107	90	wsnp_CAP7_c888_455397
716	2D	IWA965	90	wsnp_CAP12_c455_248396
717	2D	IWA1601	91.3	wsnp_Ex_c12250_19568265
718	2D	IWA5772	91.9	wsnp_JD_c10389_11059599
719	2D	IWA3605	92.5	wsnp_Ex_c3740_6815132
720	2D	IWA5752	96.5	wsnp_Ex_rep_c80588_75758453
721	3A	IWA5112	0	wsnp_Ex_rep_c104141_88935451
722	3A	IWA95	10.2	wsnp_BE489896A_Ta_2_1
723	3A	IWA390	14	wsnp_BE604885A_Ta_2_1
724	3A	IWA391	14	wsnp_BE604885A_Ta_2_2
725	3A	Xcfa2076.2	17.2
726	3A	Xgwm480	17.6
727	3A	Xcfa2076.1	23.5
728	3A	IWA2372	41.7	wsnp_Ex_c1903_3592518
729	3A	IWA7297	41.7	wsnp_Ku_c7811_13387117
730	3A	Xgwm155	54.9
731	3A	IWA6396	60.7	wsnp_Ku_c10468_17301216
732	3A	IWA6395	61.1	wsnp_Ku_c10468_17301042
733	3A	IWA2008	77.1	wsnp_Ex_c1533_2930233
734	3A	IWA2029	79.6	wsnp_Ex_c15475_23757972
735	3A	IWA926	80	wsnp_CAP12_c15_9559
736	3A	IWA799	80	wsnp_CAP11_c68_106078
737	3A	IWA524	80	wsnp_BG262734A_Ta_2_7
738	3A	IWA523	80	wsnp_BG262734A_Ta_2_3
739	3A	IWA2028	80	wsnp_Ex_c15475_23756906
740	3A	IWA1612	80.8	wsnp_Ex_c12341_19693570
741	3A	IWA1611	80.8	wsnp_Ex_c12341_19693090
742	3A	IWA855	80.8	wsnp_CAP11_rep_c4226_1995152
743	3A	IWA3111	80.8	wsnp_Ex_c27317_36522052
744	3A	IWA623	89.5	wsnp_BQ167580A_Ta_1_1
745	3A	IWA4810	90.4	wsnp_Ex_c8517_14315660
746	3A	IWA5456	90.8	wsnp_Ex_rep_c67786_66472676
747	3A	IWA444	91.6	wsnp_BF292596A_Ta_1_1
748	3A	IWA445	91.6	wsnp_BF292596A_Ta_1_3
749	3A	IWA7087	92.4	wsnp_Ku_c458_954940
750	3A	Xwmc264	101.3
751	3A	IWA4053	105.2	wsnp_Ex_c4923_8767234
752	3A	IWA7073	118.4	wsnp_Ku_c44716_51926415
753	3A	IWA237	129.7	wsnp_BE490744A_Td_2_1
754	3A	IWA5311	132.1	wsnp_Ex_rep_c66865_65262277
755	3A	IWA5312	132.1	wsnp_Ex_rep_c66865_65262612
756	3A	IWA5994	132.6	wsnp_JD_c3034_4017676
757	3A	IWA7541	132.6	wsnp_Ra_c10669_17515792
758	3A	IWA1762	133	wsnp_Ex_c1335_2556442
759	3A	IWA7150	133	wsnp_Ku_c5243_9344536
760	3A	IWA7970	133.4	wsnp_Ra_c4858_8709000
761	3A	IWA7891	133.4	wsnp_Ra_c35889_44345459
762	3A	IWA7817	133.4	wsnp_Ra_c27831_37346894
763	3A	IWA7564	133.4	wsnp_Ra_c11291_18338838
764	3A	IWA6913	133.4	wsnp_Ku_c3286_6111264
765	3A	IWA6907	133.4	wsnp_Ku_c32404_42016343
766	3A	IWA5579	133.4	wsnp_Ex_rep_c69034_67935465
767	3A	IWA5578	133.4	wsnp_Ex_rep_c69034_67934852
768	3A	IWA4794	133.4	wsnp_Ex_c8334_14049699
769	3A	IWA4707	133.4	wsnp_Ex_c763_1503467
770	3A	IWA4110	133.4	wsnp_Ex_c51776_55603135
771	3A	IWA4001	133.4	wsnp_Ex_c47907_52974924
772	3A	IWA3999	133.4	wsnp_Ex_c47763_52874806
773	3A	IWA3772	133.4	wsnp_Ex_c41283_48141201
774	3A	IWA3600	133.4	wsnp_Ex_c37208_45002588
775	3A	IWA3512	133.4	wsnp_Ex_c35073_43285821
776	3A	IWA3250	133.4	wsnp_Ex_c29742_38738725
777	3A	IWA2925	133.4	wsnp_Ex_c24731_33983680
778	3A	IWA1982	133.4	wsnp_Ex_c15100_23284023
779	3A	IWA1701	133.4	wsnp_Ex_c12871_20402160
780	3A	IWA1700	133.4	wsnp_Ex_c12871_20400823
781	3A	IWA1604	133.4	wsnp_Ex_c12269_19597341
782	3A	IWA1536	133.4	wsnp_Ex_c11807_18960045
783	3A	IWA1507	133.4	wsnp_Ex_c1149_2206471
784	3A	IWA2986	133.4	wsnp_Ex_c25668_34932304
785	3A	IWA8621	133.4	wsnp_RFL_Contig4734_5671036
786	3A	IWA7440	134.6	wsnp_Ku_rep_c68484_67499824
787	3A	IWA6914	134.6	wsnp_Ku_c3286_6111360
788	3A	IWA4930	134.6	wsnp_Ex_c9510_15761235
789	3A	IWA3771	134.6	wsnp_Ex_c41283_48140956
790	3A	IWA1983	134.6	wsnp_Ex_c15100_23284292
791	3A	IWA1605	134.6	wsnp_Ex_c12269_19597415
792	3A	IWA7441	134.6	wsnp_Ku_rep_c68484_67500021
793	3A	IWA5849	135	wsnp_JD_c14691_14352459
794	3A	IWA5314	135.4	wsnp_Ex_rep_c66865_65263145
795	3A	IWA5313	135.4	wsnp_Ex_rep_c66865_65262892
796	3A	IWA5315	135.4	wsnp_Ex_rep_c66865_65264070
797	3A	IWA5124	136.6	wsnp_Ex_rep_c104884_89459472
798	3A	IWA7114	137	wsnp_Ku_c4886_8753646
799	3A	IWA6783	137	wsnp_Ku_c25809_35776454
800	3A	IWA6170	137	wsnp_JD_c7441_8535047
801	3A	IWA3836	137	wsnp_Ex_c42698_49211728
802	3A	IWA2750	137	wsnp_Ex_c22766_31972755
803	3A	IWA2748	137	wsnp_Ex_c22766_31972202
804	3A	IWA73	137	wsnp_BE406587A_Ta_2_1
805	3A	IWA4923	137.4	wsnp_Ex_c9468_15697512
806	3A	IWA2886	137.4	wsnp_Ex_c24293_33532428
807	3A	IWA2618	137.4	wsnp_Ex_c2148_4035913
808	3A	IWA2617	137.4	wsnp_Ex_c2148_4035900
809	3A	IWA8630	137.4	wsnp_RFL_Contig4814_5829093
810	3A	IWA3376	137.8	wsnp_Ex_c32003_40728918
811	3A	IWA7319	138.3	wsnp_Ku_c8334_14181247
812	3A	IWA5316	139.4	wsnp_Ex_rep_c66867_65267909
813	3A	IWA6187	139.4	wsnp_JD_c8207_9234643
814	3A	IWA2154	142.3	wsnp_Ex_c1660_3159173
815	3A	IWA2023	142.7	wsnp_Ex_c15400_23664328
816	3A	IWA2153	142.7	wsnp_Ex_c1660_3158776
817	3A	IWA7011	144.3	wsnp_Ku_c3956_7237642
818	3A	IWA3070	144.3	wsnp_Ex_c2678_4968496
819	3A	IWA3069	144.3	wsnp_Ex_c2678_4968284
820	3A	IWA1487	144.3	wsnp_Ex_c11397_18400400
821	3A	IWA7387	144.3	wsnp_Ku_rep_c102095_89140978
822	3A	IWA8388	144.7	wsnp_RFL_Contig2767_2518373
823	3A	IWA7415	144.7	wsnp_Ku_rep_c104691_91086871
824	3A	IWA7036	144.7	wsnp_Ku_c40984_49074215
825	3A	IWA7012	144.7	wsnp_Ku_c3956_7237707
826	3A	IWA7010	144.7	wsnp_Ku_c3956_7237468
827	3A	IWA6923	144.7	wsnp_Ku_c3343_6206887
828	3A	IWA6483	144.7	wsnp_Ku_c1307_2606226
829	3A	IWA6256	144.7	wsnp_JD_rep_c49174_33405622
830	3A	IWA5164	144.7	wsnp_Ex_rep_c108072_91444417
831	3A	IWA4397	144.7	wsnp_Ex_c5997_10512308
832	3A	IWA3071	144.7	wsnp_Ex_c2678_4969725
833	3A	IWA462	144.7	wsnp_BF429272A_Ta_2_1
834	3A	IWA8405	144.7	wsnp_RFL_Contig2913_2755542
835	3A	IWA2156	145.1	wsnp_Ex_c16615_25147492
836	3A	IWA5617	145.1	wsnp_Ex_rep_c69577_68526990
837	3A	IWA8283	145.5	wsnp_RFL_Contig2011_1216801
838	3A	IWA7941	145.5	wsnp_Ra_c44141_50623811
839	3A	IWA6108	145.5	wsnp_JD_c5699_6859527
840	3A	IWA5786	145.5	wsnp_JD_c1187_1731186
841	3A	IWA5782	145.5	wsnp_JD_c11273_11770307
842	3A	IWA5006	145.5	wsnp_Ex_rep_c101340_86719239
843	3A	IWA5005	145.5	wsnp_Ex_rep_c101340_86719115
844	3A	IWA4913	145.5	wsnp_Ex_c943_1808577
845	3A	IWA4912	145.5	wsnp_Ex_c943_1808232
846	3A	IWA4172	145.5	wsnp_Ex_c53364_56625806
847	3A	IWA3156	145.5	wsnp_Ex_c28310_37444843
848	3A	IWA1922	145.5	wsnp_Ex_c14681_22747500
849	3A	IWA1422	145.5	wsnp_Ex_c11039_17902115
850	3A	IWA143	145.5	wsnp_BE443995B_Ta_2_2
851	3A	IWA8577	145.5	wsnp_RFL_Contig4273_4946890
852	3A	IWA3498	145.9	wsnp_Ex_c3478_6369892
853	3A	IWA1614	145.9	wsnp_Ex_c12354_19711297
854	3A	IWA3936	145.9	wsnp_Ex_c45438_51235587
855	3A	IWA6229	148.6	wsnp_JD_c9434_10274598
856	3A	IWA5298	150.8	wsnp_Ex_rep_c66763_65120251
857	3A	IWA7454	151.2	wsnp_Ku_rep_c69511_68887456
858	3A	IWA7064	151.2	wsnp_Ku_c44089_51445136
859	3A	IWA6877	151.2	wsnp_Ku_c30545_40369365
860	3A	IWA5763	151.2	wsnp_Ex_rep_c95365_83402134
861	3A	IWA8526	151.2	wsnp_RFL_Contig3866_4228783
862	3A	IWA90	152.4	wsnp_BE426222A_Ta_2_1
863	3A	IWA5444	152.4	wsnp_Ex_rep_c67727_66398596
864	3A	IWA4451	161.3	wsnp_Ex_c6217_10848574
865	3A	IWA2519	161.3	wsnp_Ex_c20273_29326769
866	3A	IWA335	161.3	wsnp_BE500759A_Td_2_1
867	3A	IWA177	161.3	wsnp_BE445496A_Ta_2_1
868	3A	IWA7712	161.3	wsnp_Ra_c19979_29215858
869	3A	IWA1972	177.3	wsnp_Ex_c15036_23203474
870	3A	IWA443	178.3	wsnp_BF292295A_Ta_2_1
871	3A	IWA2898	182.1	wsnp_Ex_c24432_33676448
872	3A	IWA7649	182.1	wsnp_Ra_c16278_24893033
873	3A	Xbarc86	189.2
874	3A	IWA3448	196	wsnp_Ex_c33765_42199371
875	3A	IWA5643	196	wsnp_Ex_rep_c69816_68774959
876	3A	IWA5641	196.4	wsnp_Ex_rep_c69816_68774416
877	3A	IWA5642	196.8	wsnp_Ex_rep_c69816_68774932
878	3A	IWA3739	202.5	wsnp_Ex_c4094_7399975
879	3A	IWA4333	205	wsnp_Ex_c57322_59083238
880	3A	IWA4335	205.4	wsnp_Ex_c57322_59084950
881	3A	IWA4334	205.4	wsnp_Ex_c57322_59084809
882	3A	IWA7552	205.4	wsnp_Ra_c10911_17834481
883	3A	IWA4675	206.6	wsnp_Ex_c742_1458033
884	3A	IWA4676	206.6	wsnp_Ex_c742_1458743
885	3A	IWA6413	206.6	wsnp_Ku_c11052_18135847
886	3A	Xgwm2	210.1
887	3A	Xwmc505	222.1
888	3A	Xwmc532	254.8
889	3A	IWA5969	256.5	wsnp_JD_c2722_3653988
890	3A	IWA851	260.8	wsnp_CAP11_rep_c4157_1965583
891	3A	Xwmc11	269.6
892	3A	Xbarc12	270.4
893	3A	IWA6387	274.5	wsnp_Ku_c10362_17156084
894	3A	IWA7771	279.4	wsnp_Ra_c2339_4506620
895	3A	IWA8099	0	wsnp_Ra_c9185_15386027
896	3A	IWA8164	0.8	wsnp_Ra_rep_c69820_67401482
897	3A	IWA8004	0.8	wsnp_Ra_c5532_9788185
898	3A	IWA6976	0.8	wsnp_Ku_c3817_7009093
899	3A	IWA6092	0.8	wsnp_JD_c5170_6293946
900	3A	IWA4725	0.8	wsnp_Ex_c7780_13254349
901	3A	IWA3894	0.8	wsnp_Ex_c44375_50444756
902	3A	IWA2908	0.8	wsnp_Ex_c24548_33795073
903	3A	IWA6038	1.2	wsnp_JD_c396_603720
904	3A	Xwmc11.3	3.8
905	3A	Xgwm157	5.3
906	3A	Xbarc57	6.3
907	3B	IWA5015	0	wsnp_Ex_rep_c101457_86818160
908	3B	IWA5014	0	wsnp_Ex_rep_c101457_86818055
909	3B	IWA5013	0	wsnp_Ex_rep_c101457_86817938
910	3B	IWA5016	0	wsnp_Ex_rep_c101457_86818610
911	3B	Xwmc291	7.6
912	3B	IWA298	10.8	wsnp_BE497740B_Ta_2_1
913	3B	IWA299	10.8	wsnp_BE497740B_Ta_2_2
914	3B	IWA3170	11.8	wsnp_Ex_c2850_5263978
915	3B	IWA6002	11.8	wsnp_JD_c3183_4178470
916	3B	IWA8104	18.1	wsnp_Ra_c9693_16109264
917	3B	IWA8086	18.1	wsnp_Ra_c8570_14489763
918	3B	IWA7889	18.1	wsnp_Ra_c35520_44043347
919	3B	IWA7888	18.1	wsnp_Ra_c35520_44041887
920	3B	IWA7820	18.1	wsnp_Ra_c27984_37480491
921	3B	IWA7819	18.1	wsnp_Ra_c27984_37479613
922	3B	IWA7108	18.1	wsnp_Ku_c48254_54492007
923	3B	IWA5985	18.1	wsnp_JD_c29407_23413291
924	3B	IWA5941	18.1	wsnp_JD_c22783_19631797
925	3B	IWA3901	18.1	wsnp_Ex_c4457_8018164
926	3B	IWA3593	18.1	wsnp_Ex_c36937_44790003
927	3B	IWA3592	18.1	wsnp_Ex_c36937_44789309
928	3B	IWA3455	18.1	wsnp_Ex_c3389_6223722
929	3B	IWA2951	18.1	wsnp_Ex_c25104_34368562
930	3B	IWA2619	18.1	wsnp_Ex_c21491_30636749
931	3B	IWA1095	18.1	wsnp_CAP7_c522_274783
932	3B	IWA624	18.1	wsnp_BQ167580B_Ta_2_1
933	3B	IWA81	18.1	wsnp_BE424246B_Ta_2_2
934	3B	IWA6299	18.9	wsnp_JD_rep_c63810_40704815
935	3B	IWA3591	18.9	wsnp_Ex_c36937_44788679
936	3B	IWA2620	18.9	wsnp_Ex_c21491_30637789
937	3B	IWA714	18.9	wsnp_CAP11_c2309_1201554
938	3B	IWA6375	18.9	wsnp_Ku_c10196_16926860
939	3B	IWA3598	21.5	wsnp_Ex_c37115_44930934
940	3B	IWA3046	27.1	wsnp_Ex_c26406_35653828
941	3B	IWA2613	27.9	wsnp_Ex_c21418_30554998
942	3B	IWA2400	29.5	wsnp_Ex_c1934_3648624
943	3B	IWA2399	30.3	wsnp_Ex_c1934_3648048
944	3B	IWA2124	30.3	wsnp_Ex_c16378_24870688
945	3B	IWA2510	30.3	wsnp_Ex_c20168_29214721
946	3B	IWA1598	30.7	wsnp_Ex_c12220_19528388
947	3B	IWA6254	34.3	wsnp_JD_rep_c49010_33257826
948	3B	IWA344	35.3	wsnp_BE517914B_Ta_2_5
949	3B	IWA6222	35.7	wsnp_JD_c9360_10216526
950	3B	IWA6157	35.7	wsnp_JD_c6974_8084450
951	3B	IWA6223	35.7	wsnp_JD_c9371_10224837
952	3B	IWA5805	36.1	wsnp_JD_c12281_12555386
953	3B	IWA8290	36.9	wsnp_RFL_Contig2073_1317762
954	3B	IWA7512	36.9	wsnp_Ku_rep_c72700_72370664
955	3B	IWA6493	36.9	wsnp_Ku_c13311_21255891
956	3B	IWA5710	36.9	wsnp_Ex_rep_c70809_69689636
957	3B	IWA4218	36.9	wsnp_Ex_c5418_9575485
958	3B	IWA3305	36.9	wsnp_Ex_c3096_5709257
959	3B	IWA3304	36.9	wsnp_Ex_c3096_5708642
960	3B	IWA3018	36.9	wsnp_Ex_c2609_4852360
961	3B	IWA2573	36.9	wsnp_Ex_c21094_30222280
962	3B	IWA8583	36.9	wsnp_RFL_Contig4320_5027794
963	3B	IWA3306	37.3	wsnp_Ex_c3096_5709369
964	3B	Xbarc164	39.4
965	3B	IWA5711	41.8	wsnp_Ex_rep_c70809_69690102
966	3B	IWA4721	42.3	wsnp_Ex_c7756_13218814
967	3B	IWA4439	43.5	wsnp_Ex_c6162_10773908
968	3B	IWA7510	43.5	wsnp_Ku_rep_c72504_72191206
969	3B	IWA5100	44.3	wsnp_Ex_rep_c103505_88446868
970	3B	IWA3710	44.3	wsnp_Ex_c40060_47197384
971	3B	IWA2022	44.3	wsnp_Ex_c15399_23662312
972	3B	IWA5101	44.3	wsnp_Ex_rep_c103505_88447145
973	3B	IWA7519	44.7	wsnp_Ku_rep_c73198_72796386
974	3B	IWA8196	44.7	wsnp_Ra_rep_c74606_72470419
975	3B	IWA3245	46.3	wsnp_Ex_c29631_38640100
976	3B	IWA4613	46.3	wsnp_Ex_c7021_12096881
977	3B	IWA5869	47.2	wsnp_JD_c15974_15272598
978	3B	IWA6297	47.2	wsnp_JD_rep_c63654_40605158
979	3B	Xwmc1	52.7
980	3B	Xwmc307.1	60.7
981	3B	IWA3021	65.1	wsnp_Ex_c26128_35374652
982	3B	IWA6814	65.1	wsnp_Ku_c27177_37127542
983	3B	IWA3001	66	wsnp_Ex_c2580_4800249
984	3B	IWA2999	66	wsnp_Ex_c2580_4799370
985	3B	IWA6213	66	wsnp_JD_c9042_9950637
986	3B	IWA2550	69.4	wsnp_Ex_c20652_29734133
987	3B	IWA1206	69.4	wsnp_CAP8_c6899_3227098
988	3B	IWA6698	69.4	wsnp_Ku_c210_413608
989	3B	Xwmc505.3	79.5
990	3B	IWA6165	82.9	wsnp_JD_c7325_8422075
991	3B	IWA4755	82.9	wsnp_Ex_c7967_13522958
992	3B	IWA4310	82.9	wsnp_Ex_c5657_9942445
993	3B	IWA4226	82.9	wsnp_Ex_c54357_57265797
994	3B	IWA4040	82.9	wsnp_Ex_c4888_8714379
995	3B	IWA4039	82.9	wsnp_Ex_c4888_8713275
996	3B	IWA7860	82.9	wsnp_Ra_c32055_41111615
997	3B	IWA1863	83.3	wsnp_Ex_c14147_22077948
998	3B	IWA7294	83.3	wsnp_Ku_c7784_13343904
999	3B	IWA6920	90.6	wsnp_Ku_c33335_42844680
1000	3B	IWA6919	90.6	wsnp_Ku_c33335_42844594
1001	3B	IWA6192	90.6	wsnp_JD_c828_1226159
1002	3B	IWA3732	90.6	wsnp_Ex_c4069_7355431
1003	3B	IWA3731	90.6	wsnp_Ex_c4069_7355357
1004	3B	IWA3725	90.6	wsnp_Ex_c4063_7344449
1005	3B	IWA3150	90.6	wsnp_Ex_c2820_5215394
1006	3B	IWA7267	90.6	wsnp_Ku_c7173_12391539
1007	3B	IWA3726	91	wsnp_Ex_c4063_7344641
1008	3B	IWA6464	104.7	wsnp_Ku_c12544_20235135
1009	3B	IWA8460	105.9	wsnp_RFL_Contig3344_3442711
1010	3B	IWA3983	108.1	wsnp_Ex_c47078_52393295
1011	3B	IWA7342	117.1	wsnp_Ku_c9009_15185650
1012	3B	Xbarc217.3	135.6
1013	3B	Xbarc131	140.1
1014	3B	IWA715	143.3	wsnp_Ex_c12844_20370784
1015	3B	IWA7363	154.3	wsnp_Ku_c9596_16057771
1016	3B	IWA7231	155.1	wsnp_Ku_c663_1368085
1017	3B	IWA3260	155.1	wsnp_Ex_c3005_5548573
1018	3B	IWA7678	155.1	wsnp_Ra_c18153_27161629
1019	3B	Xgwm493	159.7
1020	3B	Xbarc147	164.1
1021	3B	Xgwm533	165.4
1022	3B	Xstsp	167.1
1023	3B	Xgwm389	169.2
1024	3B	IWA195	171.2	wsnp_BE446462D_Ta_2_3
1025	3B	IWA1702	174.7	wsnp_Ex_c12875_20407926
1026	3B	IWA4796	176.1	wsnp_Ex_c8360_14085858
1027	3B	IWA3103	176.1	wsnp_Ex_c2723_5047696
1028	3B	IWA6471	176.1	wsnp_Ku_c12698_20441325
1029	3B	IWA5202	176.8	wsnp_Ex_rep_c66331_64502558
1030	3B	IWA5201	176.8	wsnp_Ex_rep_c66331_64502363
1031	3B	IWA5203	176.8	wsnp_Ex_rep_c66331_64503065
1032	3B	IWA4654	177.2	wsnp_Ex_c7316_12552186
1033	3B	IWA3724	177.2	wsnp_Ex_c40595_47620787
1034	3B	IWA6651	177.2	wsnp_Ku_c18473_27773912
1035	3B	IWA7230	178.2	wsnp_Ku_c6602_11531957
1036	3B	IWA5106	179.2	wsnp_Ex_rep_c103892_88739043
1037	3B	IWA4800	179.2	wsnp_Ex_c8386_14127329
1038	3B	IWA2822	179.2	wsnp_Ex_c23633_32868822
1039	3B	IWA7174	179.2	wsnp_Ku_c55746_59522526
1040	3B	Xbarc238	196.3
1041	3B	Xstse	203.1
1042	3B	Xbarc84	0
1043	3B	IWA7542	6.5	wsnp_Ra_c10710_17570054
1044	3B	IWA3454	10.8	wsnp_Ex_c33879_42293206
1045	3B	IWA787	10.8	wsnp_CAP11_c59_99769
1046	3B	IWA785	10.8	wsnp_CAP11_c59_99317
1047	3B	IWA784	10.8	wsnp_CAP11_c59_99263
1048	3B	IWA8628	10.8	wsnp_RFL_Contig4792_5787180
1049	3B	IWA786	11.6	wsnp_CAP11_c59_99702
1050	3B	IWA8058	13.4	wsnp_Ra_c7158_12394405
1051	3B	Xbarc77	15.8
1052	3B	IWA7938	26.3	wsnp_Ra_c4373_7946257
1053	3B	IWA341	28.8	wsnp_BE517780B_Ta_1_1
1054	3B	IWA4311	35	wsnp_Ex_c56591_58653386
1055	3B	IWA3159	35.9	wsnp_Ex_c284_548711
1056	3B	Xgwm114	44.3
1057	3B	IWA150	51.9	wsnp_BE444579B_Ta_2_2
1058	3B	IWA2147	56.7	wsnp_Ex_c16569_25082760
1059	3B	IWA3951	58.9	wsnp_Ex_c45877_51548342
1060	3B	IWA1756	60.1	wsnp_Ex_c13284_20948460
1061	3B	Xgwm340	66
1062	3B	Xgwm247	66.4
1063	3D	IWA4081	0	wsnp_Ex_c5061_8986366
1064	3D	IWA7526	0	wsnp_Ku_rep_c87658_81274182
1065	3D	IWA6777	0	wsnp_Ku_c25527_35493338
1066	3D	IWA1714	0	wsnp_Ex_c12963_20529801
1067	3D	IWA4682	0	wsnp_Ex_c7451_12757152
1068	3D	IWA7823	0	wsnp_Ra_c28858_38278180
1069	3D	IWA4683	0	wsnp_Ex_c7451_12757458
1070	3D	IWA643	0	wsnp_CAP11_c1051_622082
1071	3D	IWA6725	0	wsnp_Ku_c2249_4335279
1072	3D	IWA1715	0	wsnp_Ex_c12963_20529964
1073	3D	IWA7274	0	wsnp_Ku_c7264_12545135
1074	3D	IWA1796	1.6	wsnp_Ex_c13629_21411429
1075	3D	IWA1616	1.6	wsnp_Ex_c12369_19730765
1076	3D	IWA6119	0	wsnp_JD_c5919_7081809
1077	3D	IWA5469	0.8	wsnp_Ex_rep_c67897_66613415
1078	3D	IWA3573	1.6	wsnp_Ex_c36364_44338188
1079	3D	Xwmc533	7
1080	3D	Xgwm191.1	9.7
1081	3D	Xgwm132.3	17.7
1082	3D	Xgwm52	19.4
1083	3D	Xgwm102.1	26.4
1084	3D	Xgwm314	60.7
1085	3D	IWA525	67.4	wsnp_Ex_c10279_16851747
1086	3D	IWA6205	68.6	wsnp_Ex_c11474_18507872
1087	3D	Xgwm383	82.8
1088	3D	IWA5230	89.4
1089	4A	IWA2854	0	wsnp_Ex_c2389_4479352
1090	4A	IWA4981	0.4	wsnp_Ex_c9928_16346945
1091	4A	IWA8389	4.7	wsnp_RFL_Contig2771_2524880
1092	4A	IWA285	4.7	wsnp_BE497160A_Ta_1_1
1093	4A	IWA54	4.7	wsnp_BE405275A_Ta_1_1
1094	4A	IWA3161	6.1	wsnp_Ex_c28429_37553452
1095	4A	IWA3993	9.5	wsnp_Ex_c4752_8482625
1096	4A	IWA3902	16.1	wsnp_Ex_c44587_50598716
1097	4A	IWA3584	16.1	wsnp_Ex_c36701_44603531
1098	4A	IWA4480	16.1	wsnp_Ex_c6320_11003591
1099	4A	IWA7124	21.3	wsnp_Ku_c49919_55679171
1100	4A	IWA8296	22.2	wsnp_RFL_Contig2124_1400618
1101	4A	IWA8265	22.2	wsnp_RFL_Contig1883_1034534
1102	4A	IWA7082	22.2	wsnp_Ku_c45402_52441586
1103	4A	IWA7080	22.2	wsnp_Ku_c45402_52441010
1104	4A	IWA6678	22.2	wsnp_Ku_c19762_29300876
1105	4A	IWA6659	22.2	wsnp_Ku_c18734_28082266
1106	4A	IWA5648	22.2	wsnp_Ex_rep_c69852_68811496
1107	4A	IWA5647	22.2	wsnp_Ex_rep_c69852_68811339
1108	4A	IWA5490	22.2	wsnp_Ex_rep_c68052_66798492
1109	4A	IWA5196	22.2	wsnp_Ex_rep_c66304_64468123
1110	4A	IWA5127	22.2	wsnp_Ex_rep_c105114_89631277
1111	4A	IWA3763	22.2	wsnp_Ex_c41192_48071978
1112	4A	IWA3671	22.2	wsnp_Ex_c39168_46522625
1113	4A	IWA3309	22.2	wsnp_Ex_c30989_39836304
1114	4A	IWA3308	22.2	wsnp_Ex_c30989_39836034
1115	4A	IWA1969	22.2	wsnp_Ex_c15000_23158167
1116	4A	IWA912	22.2	wsnp_CAP12_c124_70843
1117	4A	IWA750	22.2	wsnp_CAP11_c3346_1639010
1118	4A	IWA8494	22.2	wsnp_RFL_Contig362_3816537
1119	4A	IWA3818	22.7	wsnp_Ex_c4220_7623030
1120	4A	IWA5705	24	wsnp_Ex_rep_c70681_69583486
1121	4A	IWA8150	25.4	wsnp_Ra_rep_c113072_94706239
1122	4A	IWA6702	25.4	wsnp_Ku_c2114_4088504
1123	4A	IWA6701	25.4	wsnp_Ku_c2114_4088174
1124	4A	IWA5237	25.4	wsnp_Ex_rep_c66426_64645835
1125	4A	IWA5236	25.4	wsnp_Ex_rep_c66426_64644630
1126	4A	IWA8342	25.4	wsnp_RFL_Contig2500_2084385
1127	4A	IWA3028	28.2	wsnp_Ex_c2617_4864441
1128	4A	IWA3029	28.2	wsnp_Ex_c2617_4864955
1129	4A	IWA1178	28.6	wsnp_CAP8_c296_283066
1130	4A	IWA826	28.6	wsnp_CAP11_c992_593615
1131	4A	IWA3027	28.6	wsnp_Ex_c2617_4864218
1132	4A	IWA2334	29.8	wsnp_Ex_c1865_3515470
1133	4A	IWA4771	29.8	wsnp_Ex_c8131_13753986
1134	4A	IWA6944	30.3	wsnp_Ku_c34883_44172415
1135	4A	IWA5729	30.3	wsnp_Ex_rep_c71305_70087742
1136	4A	IWA4772	30.3	wsnp_Ex_c8131_13754852
1137	4A	IWA3792	30.3	wsnp_Ex_c4166_7525617
1138	4A	IWA3582	30.3	wsnp_Ex_c3666_6687919
1139	4A	IWA3581	30.3	wsnp_Ex_c3666_6687275
1140	4A	IWA3088	30.3	wsnp_Ex_c27088_36309449
1141	4A	IWA2292	30.3	wsnp_Ex_c18229_27041048
1142	4A	IWA1919	30.3	wsnp_Ex_c14641_22698595
1143	4A	IWA1060	30.3	wsnp_CAP7_c2243_1090229
1144	4A	IWA7522	30.3	wsnp_Ku_rep_c77171_75478137
1145	4A	IWA296	30.7	wsnp_BE497618A_Ta_1_1
1146	4A	IWA5553	35.4	wsnp_Ex_rep_c68601_67451370
1147	4A	IWA3826	35.8	wsnp_Ex_c42406_48991013
1148	4A	IWA1327	35.8	wsnp_Ex_c10463_17113256
1149	4A	IWA4876	35.8	wsnp_Ex_c9094_15139750
1150	4A	IWA6103	37	wsnp_JD_c5620_6774675
1151	4A	IWA5335	37	wsnp_Ex_rep_c66930_65358529
1152	4A	IWA3877	37	wsnp_Ex_c43734_49968808
1153	4A	IWA3522	37	wsnp_Ex_c3541_6477925
1154	4A	IWA3324	37	wsnp_Ex_c31173_39999624
1155	4A	IWA3118	37	wsnp_Ex_c2757_5107541
1156	4A	IWA2699	37	wsnp_Ex_c22242_31433907
1157	4A	IWA6443	37	wsnp_Ku_c11945_19406789
1158	4A	IWA3173	38.6	wsnp_Ex_c28548_37671437
1159	4A	IWA1727	38.6	wsnp_Ex_c13091_20706489
1160	4A	IWA4709	38.6	wsnp_Ex_c7658_13075559
1161	4A	IWA730	39.1	wsnp_CAP11_c279_238344
1162	4A	Xwmc491	44.5
1163	4A	IWA5699	52.4	wsnp_Ex_rep_c70578_69495303
1164	4A	IWA4867	52.4	wsnp_Ex_c9035_15054913
1165	4A	IWA7448	52.4	wsnp_Ku_rep_c68861_68030775
1166	4A	IWA4698	52.8	wsnp_Ex_c7528_12868250
1167	4A	IWA402	53.9	wsnp_BE637808A_Ta_2_1
1168	4A	IWA5349	58.6	wsnp_Ex_rep_c67054_65517671
1169	4A	IWA2460	64.3	wsnp_Ex_c19773_28772235
1170	4A	IWA6884	67.2	wsnp_Ku_c3081_5777347
1171	4A	IWA6883	67.2	wsnp_Ku_c3081_5777013
1172	4A	IWA6882	67.2	wsnp_Ku_c3081_5776947
1173	4A	IWA3981	67.2	wsnp_Ex_c469_928349
1174	4A	IWA6885	67.2	wsnp_Ku_c3081_5778117
1175	4A	IWA6454	69.5	wsnp_Ku_c1205_2398925
1176	4A	IWA5116	71.8	wsnp_Ex_rep_c104448_89161562
1177	4A	IWA1720	71.8	wsnp_Ex_c13031_20625900
1178	4A	IWA5200	71.8	wsnp_Ex_rep_c66324_64493429
1179	4A	IWA7058	73	wsnp_Ku_c4342_7887834
1180	4A	IWA4142	77.3	wsnp_Ra_rep_c111161_93528347
1181	4A	Xbarc170	79.7
1182	4A	Xbarc155	85
1183	4A	IWA7310	88.2	wsnp_Ku_c8059_13763683
1184	4A	IWA6035	89.8	wsnp_JD_c38619_27992279
1185	4A	Xwmc258	100.6
1186	4A	Xwmc161	106.2
1187	4A	IWA6506	110.2	wsnp_Ku_c13768_21859275
1188	4A	IWA2761	111.4	wsnp_Ex_c2288_4293430
1189	4A	IWA811	125.8	wsnp_CAP11_c8366_3622210
1190	4A	IWA3061	128.8	wsnp_Ex_c26740_35969367
1191	4A	IWA4527	130.9	wsnp_Ex_c6514_11307200
1192	4A	IWA5968	130.9	wsnp_JD_c27162_22206547
1193	4A	IWA3068	132.9	wsnp_Ex_c26776_36003586
1194	4A	IWA7322	133.4	wsnp_Ku_c8391_14261321
1195	4A	IWA585	133.4	wsnp_BG607523B_Ta_2_4
1196	4A	IWA8475	139.1	wsnp_RFL_Contig3501_3652740
1197	4A	IWA2170	149.2	wsnp_Ex_c16814_25373602
1198	4A	IWA1067	149.2	wsnp_CAP7_c254_139077
1199	4A	IWA1066	149.2	wsnp_CAP7_c254_138937
1200	4A	IWA6690	149.2	wsnp_Ku_c20783_30448706
1201	4A	IWA3864	149.6	wsnp_Ex_c4331_7808746
1202	4A	IWA7049	149.6	wsnp_Ku_c42833_50483239
1203	4A	Xwmc232.1	153.5
1204	4A	Xgwm160	164.5
1205	4A	Xgwm293.4	172.6
1206	4A	IWA6696	181.2	wsnp_Ku_c20949_30631810
1207	4A	IWA6774	181.6	wsnp_Ku_c25372_35336531
1208	4A	IWA2756	184	wsnp_Ex_c22830_32035900
1209	4A	IWA3192	184	wsnp_Ex_c2886_5325103
1210	4A	IWA7126	184.5	wsnp_Ku_c5033_8989455
1211	4A	IWA4946	187.8	wsnp_Ex_c9618_15912364
1212	4A	IWA6878	187.8	wsnp_Ku_c3056_5734773
1213	4A	IWA7539	193.6	wsnp_Ra_c10658_17500389
1214	4A	Xwmc313.1	199.6
1215	4A	Xwmc307.2	201.3
1216	4A	Xwmc313.5	201.3
1217	4A	Xwmc376.3	204.8
1218	4B	IWA6457	0	wsnp_Ku_c12399_20037334
1219	4B	IWA7729	1.7	wsnp_Ra_c2078_4037878
1220	4B	IWA2228	7.6	wsnp_Ex_c17561_26284693
1221	4B	IWA1768	8.9	wsnp_Ex_c13357_21054802
1222	4B	Xwmc617.2	19.6
1223	4B	IWA3615	21.7	wsnp_Ex_c37502_45236634
1224	4B	IWA7266	22.5	wsnp_Ku_c7153_12360198
1225	4B	IWA4662	31.1	wsnp_Ex_c7362_12622736
1226	4B	IWA482	42.6	wsnp_BF474615A_Ta_1_1
1227	4B	IWA1846	43.5	wsnp_Ex_c14026_21924297
1228	4B	IWA6850	43.5	wsnp_Ku_c28756_38667953
1229	4B	Xgwm368	49.8
1230	4B	Xbarc20	51.3
1231	4B	Xwmc48	52.3
1232	4B	Xwmc826.1	57.4
1233	4B	IWA453	60.2	wsnp_BF293573B_Ta_1_1
1234	4B	IWA327	61.5	wsnp_BE499456B_Ta_1_1
1235	4B	IWA113	66	wsnp_BE442869B_Ta_1_1
1236	4B	IWA7641	66.6	wsnp_Ra_c15715_24192817
1237	4B	IWA5679	67.3	wsnp_Ex_rep_c70265_69211592
1238	4B	IWA58	67.3	wsnp_BE405519B_Ta_1_1
1239	4B	Xgwm251	81.3
1240	4B	Xgwm301.1	89.2
1241	4B	Xgwm149	93.4
1242	4B	IWA7688	95.1	wsnp_Ra_c18498_27571740
1243	4B	IWA7167	95.1	wsnp_Ku_c5502_9764246
1244	4B	IWA6898	95.1	wsnp_Ku_c31283_41033384
1245	4B	IWA6495	95.1	wsnp_Ku_c13381_21349778
1246	4B	IWA6011	95.1	wsnp_JD_c33645_25575463
1247	4B	IWA5725	95.1	wsnp_Ex_rep_c71154_69976915
1248	4B	IWA5195	95.1	wsnp_Ex_rep_c66285_64443309
1249	4B	IWA4330	95.1	wsnp_Ex_c57212_59019379
1250	4B	IWA4248	95.1	wsnp_Ex_c5479_9671318
1251	4B	IWA4070	95.1	wsnp_Ex_c50195_54565006
1252	4B	IWA3846	95.1	wsnp_Ex_c42895_49355806
1253	4B	IWA3392	95.1	wsnp_Ex_c32467_41117359
1254	4B	IWA2745	95.1	wsnp_Ex_c22740_31947788
1255	4B	IWA2666	95.1	wsnp_Ex_c220_432519
1256	4B	IWA2155	95.1	wsnp_Ex_c16611_25142774
1257	4B	IWA1961	95.1	wsnp_Ex_c14962_23115336
1258	4B	IWA1105	95.1	wsnp_CAP7_c8429_3785777
1259	4B	IWA1007	95.1	wsnp_CAP12_rep_c4278_1949864
1260	4B	IWA1006	95.1	wsnp_CAP12_rep_c4278_1949802
1261	4B	IWA782	95.1	wsnp_CAP11_c575_392117
1262	4B	IWA8019	95.1	wsnp_Ra_c59050_60525086
1263	4B	IWA7168	95.5	wsnp_Ku_c5502_9765942
1264	4B	IWA2532	95.5	wsnp_Ex_c20377_29442562
1265	4B	IWA2398	95.5	wsnp_Ex_c19319_28253742
1266	4B	IWA1818	95.5	wsnp_Ex_c13849_21698240
1267	4B	IWA1344	95.5	wsnp_Ex_c10548_17228697
1268	4B	IWA7437	95.5	wsnp_Ku_rep_c68318_67259259
1269	4B	IWA3551	96.7	wsnp_Ex_c35910_43971560
1270	4B	IWA3608	96.7	wsnp_Ex_c37437_45183193
1271	4B	IWA3611	97.3	wsnp_Ex_c37437_45184851
1272	4B	IWA3610	97.3	wsnp_Ex_c37437_45184082
1273	4B	IWA3609	97.3	wsnp_Ex_c37437_45183236
1274	4B	IWA187	97.3	wsnp_BE446161B_Td_2_2
1275	4B	IWA4640	97.3	wsnp_Ex_c72198_70679871
1276	4B	IWA2755	97.9	wsnp_Ex_c22785_31991891
1277	4B	IWA2754	97.9	wsnp_Ex_c22785_31991697
1278	4B	IWA2393	97.9	wsnp_Ex_c19277_28209074
1279	4B	IWA1382	97.9	wsnp_Ex_c107075_90880218
1280	4B	IWA2171	97.9	wsnp_Ex_c16825_25387841
1281	4B	IWA2974	97.9	wsnp_Ex_c25467_34731005
1282	4B	IWA892	99.9	wsnp_CAP11_rep_c8663_3738968
1283	4B	IWA908	100.4	wsnp_CAP12_c1101_569783
1284	4B	IWA1028	100.4	wsnp_CAP7_c1259_634919
1285	4B	Xbarc163	103.1
1286	4B	IWA5365	111.7	wsnp_Ex_rep_c67159_65649966
1287	4B	IWA6461	112.1	wsnp_Ku_c12503_20174234
1288	4B	IWA329	113.4	wsnp_BE499546B_Ta_2_1
1289	4B	Xwmc125	131.7
1290	4B	Xbarc114	136.6
1291	4B	IWA1100	139.1	wsnp_CAP7_c599_312057
1292	4B	IWA4490	139.1	wsnp_Ex_c6381_11093111
1293	4B	IWA6397	139.6	wsnp_Ku_c10515_17368422
1294	4B	IWA5408	139.6	wsnp_Ex_rep_c67510_66116823
1295	4B	IWA2595	139.6	wsnp_Ex_c21293_30421496
1296	4B	IWA6465	139.6	wsnp_Ku_c12557_20249122
1297	4B	IWA8197	140	wsnp_Ra_rep_c74879_72651462
1298	4B	IWA5885	141.3	wsnp_JD_c17976_16616890
1299	4B	IWA3781	148	wsnp_Ex_c4148_7495656
1300	4B	IWA27	148	wsnp_BE403378B_Ta_2_1
1301	4B	IWA408	156.3	wsnp_BE638137B_Ta_2_2
1302	4B	Xcfa2149.2	158.6
1303	4D	IWA3116	0	wsnp_Ex_c27524_36724744
1304	4D	IWA6277	8.6	wsnp_JD_rep_c51623_35119179
1305	4D	IWA1633	11.1	wsnp_Ex_c12450_19850925
1306	4D	Xwmc473	13.7
1307	4D	Xwmc720	18
1308	4D	Xbarc217.2	19.8
1309	5A	IWA2145	0	wsnp_Ex_c16551_25061517
1310	5A	IWA5053	7.3	wsnp_Ex_rep_c102143_87374435
1311	5A	IWA4932	7.7	wsnp_Ex_c95453_83448583
1312	5A	IWA7801	8.1	wsnp_Ra_c26916_36465414
1313	5A	IWA14	8.1	wsnp_BE399966A_Ta_2_3
1314	5A	IWA4325	8.5	wsnp_Ex_c572_1138339
1315	5A	IWA5368	14.2	wsnp_Ex_rep_c67179_65674582
1316	5A	IWA6859	14.6	wsnp_Ku_c29319_39227528
1317	5A	IWA330	15.4	wsnp_BE499835A_Ta_2_1
1318	5A	IWA4766	15.4	wsnp_Ex_c807_1586158
1319	5A	IWA4765	15.8	wsnp_Ex_c807_1585614
1320	5A	IWA331	15.8	wsnp_BE499835A_Ta_2_2
1321	5A	IWA4767	15.8	wsnp_Ex_c807_1586396
1322	5A	IWA4069	16.2	wsnp_Ex_c5013_8914160
1323	5A	IWA3811	16.2	wsnp_Ex_c4211_7606269
1324	5A	IWA2378	16.2	wsnp_Ex_c19134_28056012
1325	5A	IWA1062	16.2	wsnp_CAP7_c2282_1107112
1326	5A	IWA5615	16.2	wsnp_Ex_rep_c69526_68472787
1327	5A	IWA3365	17	wsnp_Ex_c31830_40573624
1328	5A	IWA5614	17	wsnp_Ex_rep_c69526_68472665
1329	5A	IWA4465	18.8	wsnp_Ex_c62701_62229607
1330	5A	IWA5728	18.8	wsnp_Ex_rep_c71219_70023450
1331	5A	IWA4068	19.2	wsnp_Ex_c501_995323
1332	5A	IWA6405	21.1	wsnp_Ku_c10720_17663337
1333	5A	IWA3263	29.9	wsnp_Ex_c30178_39124189
1334	5A	IWA5395	31.3	wsnp_Ex_rep_c67394_65974276
1335	5A	IWA4454	31.3	wsnp_Ex_c62351_62025689
1336	5A	IWA7777	31.3	wsnp_Ra_c24707_34262900
1337	5A	IWA3776	33.2	wsnp_Ex_c41347_48190370
1338	5A	IWA3775	33.2	wsnp_Ex_c41347_48189975
1339	5A	IWA7980	33.2	wsnp_Ra_c5057_9025399
1340	5A	IWA7226	33.6	wsnp_Ku_c644_1332610
1341	5A	IWA6237	33.6	wsnp_JD_c9771_10559815
1342	5A	IWA5384	33.6	wsnp_Ex_rep_c67313_65859799
1343	5A	IWA3921	33.6	wsnp_Ex_c4501_8092034
1344	5A	IWA1280	33.6	wsnp_Ex_c10109_16614013
1345	5A	IWA156	33.6	wsnp_BE444720A_Ta_2_1
1346	5A	IWA8119	33.6	wsnp_Ra_rep_c105791_89683548
1347	5A	IWA333	34	wsnp_BE500291A_Ta_2_1
1348	5A	IWA154	34	wsnp_BE444644A_Ta_2_1
1349	5A	IWA7623	34	wsnp_Ra_c14112_22155312
1350	5A	IWA324	34.4	wsnp_BE499257A_Ta_2_1
1351	5A	IWA1546	35	wsnp_Ex_c11874_19050989
1352	5A	IWA4710	36.9	wsnp_Ex_c7668_13089715
1353	5A	Xgwm415	41.4
1354	5A	Xwmc150.3	41.8
1355	5A	Xgwm293.3	42.2
1356	5A	Xbarc180	45.1
1357	5A	Xgwm425.2	46.3
1358	5A	IWA1943	47.5	wsnp_Ex_c14812_22928900
1359	5A	IWA1950	49.7	wsnp_Ex_c14839_22961659
1360	5A	IWA7925	50.2	wsnp_Ra_c4187_7642735
1361	5A	IWA5105	50.2	wsnp_Ex_rep_c103811_88676355
1362	5A	IWA1951	50.2	wsnp_Ex_c14839_22961666
1363	5A	IWA7926	50.2	wsnp_Ra_c4187_7643034
1364	5A	IWA5184	51	wsnp_Ex_rep_c113621_94394656
1365	5A	IWA7596	51	wsnp_Ra_c13_24540
1366	5A	IWA5107	51.8	wsnp_Ex_rep_c103972_88799335
1367	5A	IWA1630	52.2	wsnp_Ex_c12440_19836844
1368	5A	IWA7597	52.2	wsnp_Ra_c13_24576
1369	5A	IWA1253	52.6	wsnp_CD453438A_Ta_2_1
1370	5A	IWA291	52.6	wsnp_BE497368A_Ta_2_1
1371	5A	IWA114	52.6	wsnp_BE442892A_Ta_2_2
1372	5A	IWA1988	52.6	wsnp_Ex_c15163_23357477
1373	5A	IWA5884	56.9	wsnp_JD_c1796_2496653
1374	5A	IWA5528	57.7	wsnp_Ex_rep_c68441_67261679
1375	5A	IWA5529	57.7	wsnp_Ex_rep_c68441_67261799
1376	5A	Xbarc100	60.2
1377	5A	IWA121	62.7	wsnp_BE443187A_Ta_2_2
1378	5A	IWA122	62.7	wsnp_BE443187A_Ta_2_3
1379	5A	Xgwm156	63.9
1380	5A	IWA5094	68.1	wsnp_Ex_rep_c103402_88371152
1381	5A	IWA850	68.6	wsnp_CAP11_rep_c4151_1963100
1382	5A	IWA6036	68.6	wsnp_JD_c3867_4934646
1383	5A	IWA2374	69.1	wsnp_Ex_c19057_27975510
1384	5A	IWA4047	69.1	wsnp_Ex_c4921_8763500
1385	5A	IWA3683	71.2	wsnp_Ex_c39592_46849607
1386	5A	IWA4668	73.7	wsnp_Ex_c7383_12655410
1387	5A	IWA4670	73.7	wsnp_Ex_c7383_12655992
1388	5A	IWA4667	74.4	wsnp_Ex_c7383_12654806
1389	5A	IWA3313	74.4	wsnp_Ex_c31017_39858962
1390	5A	IWA4669	74.4	wsnp_Ex_c7383_12655468
1391	5A	IWA739	74.8	wsnp_CAP11_c299_251533
1392	5A	IWA738	74.8	wsnp_CAP11_c299_251377
1393	5A	IWA740	74.8	wsnp_CAP11_c299_251594
1394	5A	Xbarc197	80.7
1395	5A	IWA6573	83.1	wsnp_Ku_c15816_24541162
1396	5A	IWA1236	84.6	wsnp_CAP8_rep_c5486_2606556
1397	5A	IWA7447	84.6	wsnp_Ku_rep_c68797_67943795
1398	5A	IWA3717	85.8	wsnp_Ex_c4026_7281501
1399	5A	IWA74	86.9	wsnp_BE406877A_Ta_2_8
1400	5A	Xwmc415.1	89.2
1401	5A	Xbarc165	106.8
1402	5A	IWA2363	140.8	wsnp_Ex_c18941_27840714
1403	5A	IWA7665	143.3	wsnp_Ra_c17216_26044790
1404	5A	IWA3996	150.6	wsnp_Ex_c47684_52820187
1405	5A	IWA12	150.6	wsnp_BE399939A_Ta_2_1
1406	5A	IWA5668	150.6	wsnp_Ex_rep_c70117_69067356
1407	5A	Xbarc151	152.8
1408	5A	Xgwm666.2	156.3
1409	5A	IWA4980	159.2	wsnp_Ex_c9927_16346100
1410	5A	IWA5945	162.7	wsnp_JD_c23511_20069005
1411	5A	IWA2014	165.2	wsnp_Ex_c15342_23592789
1412	5A	IWA5623	165.2	wsnp_Ex_rep_c69647_68598463
1413	5A	IWA5842	166	wsnp_JD_c14028_13868278
1414	5A	IWA5624	166	wsnp_Ex_rep_c69647_68598487
1415	5A	IWA6637	166	wsnp_Ku_c17766_26919139
1416	5A	IWA7553	170.3	wsnp_Ra_c10915_17838202
1417	5A	IWA6681	170.3	wsnp_Ku_c20011_29589089
1418	5A	IWA4468	170.3	wsnp_Ex_c62818_62296518
1419	5A	IWA1752	170.3	wsnp_Ex_c13258_20911706
1420	5A	IWA7579	170.3	wsnp_Ra_c12183_19587379
1421	5A	IWA6682	171.1	wsnp_Ku_c20011_29589289
1422	5A	IWA5838	171.1	wsnp_JD_c13773_13680294
1423	5A	IWA4469	171.1	wsnp_Ex_c62818_62296773
1424	5A	IWA6683	171.1	wsnp_Ku_c20011_29589514
1425	5A	IWA6961	171.5	wsnp_Ku_c3684_6789632
1426	5A	IWA1398	172.7	wsnp_Ex_c10853_17650289
1427	5A	IWA5288	173.5	wsnp_Ex_rep_c66689_65011117
1428	5A	IWA455	173.9	wsnp_BF293620A_Ta_2_3
1429	5A	IWA4398	173.9	wsnp_Ex_c5998_10513766
1430	5A	IWA4221	174.3	wsnp_Ex_c54193_57155632
1431	5A	IWA4220	174.3	wsnp_Ex_c54193_57155537
1432	5A	IWA590	174.3	wsnp_BJ224975A_Ta_2_2
1433	5A	IWA454	174.3	wsnp_BF293620A_Ta_2_1
1434	5A	IWA46	174.3	wsnp_BE404341A_Ta_2_3
1435	5A	IWA2	174.3	wsnp_AJ612027A_Ta_2_5
1436	5A	IWA7255	177.2	wsnp_Ku_c6977_12078791
1437	5A	IWA4449	177.2	wsnp_Ex_c621_1231444
1438	5A	IWA4448	177.2	wsnp_Ex_c621_1231298
1439	5A	IWA4447	177.2	wsnp_Ex_c621_1230852
1440	5A	IWA2350	177.2	wsnp_Ex_c18754_27630557
1441	5A	IWA2256	177.2	wsnp_Ex_c17763_26513562
1442	5A	IWA2223	177.2	wsnp_Ex_c17476_26190830
1443	5A	IWA7256	177.2	wsnp_Ku_c6977_12078885
1444	5A	IWA5040	177.6	wsnp_Ex_rep_c101994_87256479
1445	5A	IWA3887	177.6	wsnp_Ex_c44164_50292954
1446	5A	IWA2657	177.6	wsnp_Ex_c2185_4094843
1447	5A	IWA8320	177.6	wsnp_RFL_Contig2265_1693968
1448	5A	IWA4814	179.4	wsnp_Ex_c8543_14357385
1449	5A	IWA835	179.4	wsnp_CAP11_rep_c4073_1924782
1450	5A	IWA5173	179.4	wsnp_Ex_rep_c109532_92292121
1451	5A	IWA2836	182.9	wsnp_Ex_c23787_33024604
1452	5A	IWA4744	190.2	wsnp_Ex_c790_1554988
1453	5A	IWA7014	190.7	wsnp_Ku_c3973_7261765
1454	5A	IWA3704	191.2	wsnp_Ex_c40019_47166796
1455	5A	IWA3703	191.2	wsnp_Ex_c40019_47166716
1456	5A	IWA3702	191.2	wsnp_Ex_c40019_47165575
1457	5A	IWA3705	191.2	wsnp_Ex_c40019_47166980
1458	5A	IWA2163	200.8	wsnp_Ex_c16715_25264080
1459	5A	IWA2352	204.4	wsnp_Ex_c1880_3545329
1460	5A	IWA5154	234.3	wsnp_Ex_rep_c107017_90850230
1461	5A	IWA7568	236.6	wsnp_Ra_c11532_18688426
1462	5A	IWA2897	243.3	wsnp_Ex_c2441_4568016
1463	5A	IWA6641	243.3	wsnp_Ra_c3270_6136601
1464	5A	IWA2840	252	wsnp_Ex_c23795_33034037
1465	5A	IWA2839	252	wsnp_Ex_c23795_33033959
1466	5A	IWA2838	252	wsnp_Ex_c23795_33033150
1467	5A	IWA2837	252	wsnp_Ex_c23795_33033010
1468	5A	IWA7491	252	wsnp_Ku_rep_c71232_70948744
1469	5A	Xwmc524	256.3
1470	5A	IWA3391	258	wsnp_Ex_c32414_41076471
1471	5A	IWA648	258.4	wsnp_CAP11_c1116_654940
1472	5A	IWA649	258.4	wsnp_CAP11_c1116_654975
1473	5A	IWA3335	258.8	wsnp_Ex_c3136_5798236
1474	5A	IWA7509	268.1	wsnp_Ku_rep_c72362_72059764
1475	5A	IWA2642	268.9	wsnp_Ex_c2171_4072995
1476	5A	IWA6082	269.3	wsnp_JD_c493_749195
1477	5A	IWA2645	269.3	wsnp_Ex_c2171_4073721
1478	5A	IWA2641	269.3	wsnp_Ex_c2171_4072774
1479	5A	IWA6988	269.3	wsnp_Ku_c38543_47157828
1480	5A	IWA564	269.7	wsnp_BG604404B_Ta_2_1
1481	5A	Xcfa2149.1	271.4
1482	5B	IWA2867	0	wsnp_Ex_c24031_33277856
1483	5B	IWA4329	12.1	wsnp_Ex_c57209_59016692
1484	5B	IWA8006	12.9	wsnp_Ra_c5637_9955966
1485	5B	IWA5803	12.9	wsnp_JD_c12221_12509984
1486	5B	IWA5802	12.9	wsnp_JD_c12221_12509932
1487	5B	IWA4903	12.9	wsnp_Ex_c9362_15546626
1488	5B	IWA2931	12.9	wsnp_Ex_c2482_4636722
1489	5B	IWA8391	12.9	wsnp_RFL_Contig2791_2558632
1490	5B	IWA1390	14.8	wsnp_Ex_c10818_17605541
1491	5B	IWA2093	17.7	wsnp_Ex_c16045_24471413
1492	5B	IWA3183	18.5	wsnp_Ex_c28687_37791888
1493	5B	IWA2322	19.3	wsnp_Ex_c1857_3498746
1494	5B	IWA3109	19.9	wsnp_Ex_c27294_36502333
1495	5B	IWA1061	20.5	wsnp_CAP7_c2269_1100432
1496	5B	IWA3358	20.9	wsnp_Ex_c3175_5864291
1497	5B	IWA3359	20.9	wsnp_Ex_c3175_5864335
1498	5B	IWA6271	22.2	wsnp_Ku_c2185_4218722
1499	5B	IWA23	30.5	wsnp_BE403214B_Ta_2_2
1500	5B	IWA22	30.5	wsnp_BE403214B_Ta_2_1
1501	5B	IWA6902	32	wsnp_Ku_c3151_5892200
1502	5B	IWA1658	33	wsnp_Ex_c12599_20053652
1503	5B	IWA37	35.1	wsnp_BE403710B_Ta_2_1
1504	5B	IWA5454	35.1	wsnp_Ex_rep_c67783_66469848
1505	5B	IWA6713	35.5	wsnp_Ku_c21465_31217980
1506	5B	IWA4635	35.5	wsnp_Ex_c7196_12357989
1507	5B	IWA4634	35.5	wsnp_Ex_c7193_12354542
1508	5B	IWA7708	35.5	wsnp_Ra_c19660_28866961
1509	5B	IWA197	40.3	wsnp_BE446509B_Ta_2_6
1510	5B	IWA936	40.3	wsnp_CAP12_c2231_1090724
1511	5B	Xbarc59	44.2
1512	5B	IWA8031	50.7	wsnp_Ra_c6374_11143280
1513	5B	IWA7340	51.1	wsnp_Ku_c8953_15094606
1514	5B	Xwmc28	58.4
1515	5B	IWA1259	69.3	wsnp_CD454152B_Ta_2_1
1516	5B	IWA7393	69.3	wsnp_Ku_rep_c102339_89347150
1517	5B	IWA6779	70.1	wsnp_Ku_c25613_35580381
1518	5B	Xwmc167	74.7
1519	5B	Xgwm604	87.1
1520	5B	IWA7963	89.2	wsnp_Ra_c47696_53184502
1521	5B	IWA7668	90.5	wsnp_Ra_c17506_26393195
1522	5B	IWA3800	93.7	wsnp_Ex_c4189_7565086
1523	5B	IWA3275	93.7	wsnp_Ex_c3042_5618219
1524	5B	IWA7791	93.7	wsnp_Ra_c25691_35261662
1525	5B	IWA1460	94.5	wsnp_Ex_c11265_18216936
1526	5B	IWA4820	96.9	wsnp_Ex_c8633_14477407
1527	5B	IWA7989	99.8	wsnp_Ra_c5212_9291784
1528	5B	IWA7732	102.4	wsnp_Ra_c20970_30293078
1529	5B	IWA1577	102.4	wsnp_Ex_c12048_19288999
1530	5B	IWA592	102.4	wsnp_BJ291318B_Td_2_1
1531	5B	IWA47	102.4	wsnp_BE404341B_Td_2_1
1532	5B	IWA7733	102.4	wsnp_Ra_c20970_30293227
1533	5B	Xgwm408	104
1534	5B	IWA4057	105.6	wsnp_Ex_c49423_54028488
1535	5B	IWA1774	107.7	wsnp_Ex_c1343_2568829
1536	5B	IWA2565	107.7	wsnp_Ex_c210_411604
1537	5B	IWA6024	108.9	wsnp_JD_c37023_27225840
1538	5B	IWA3479	108.9	wsnp_Ex_c34474_42777857
1539	5B	IWA3226	108.9	wsnp_Ex_c29304_38355434
1540	5B	IWA6671	108.9	wsnp_Ku_c19334_28808006
1541	5B	IWA5950	111	wsnp_JD_c2415_3292425
1542	5B	IWA1780	112.2	wsnp_Ex_c13485_21225504
1543	5B	IWA3002	112.8	wsnp_Ex_c2582_4804223
1544	5B	IWA4793	113.4	wsnp_Ex_c8322_14030310
1545	5B	IWA4774	113.4	wsnp_Ex_c8142_13769831
1546	5B	IWA3905	113.4	wsnp_Ex_c44737_50715462
1547	5B	IWA3264	113.4	wsnp_Ex_c30185_39132025
1548	5B	IWA2634	113.4	wsnp_Ex_c21625_30775155
1549	5B	IWA6459	113.4	wsnp_Ku_c12464_20125626
1550	5B	IWA4211	113.8	wsnp_Ex_c54092_57099525
1551	5B	IWA8470	113.8	wsnp_RFL_Contig3411_3541929
1552	5B	IWA3022	115.1	wsnp_Ex_c26142_35389286
1553	5B	Xwmc289	122.2
1554	5B	IWA6627	133.5	wsnp_Ku_c17396_26488733
1555	5B	IWA6894	133.9	wsnp_Ku_c3102_5810751
1556	5B	IWA6895	133.9	wsnp_Ku_c3102_5811860
1557	5B	IWA3643	138.7	wsnp_Ex_c3834_6971712
1558	5B	IWA3642	138.7	wsnp_Ex_c3834_6971680
1559	5B	IWA3641	138.7	wsnp_Ex_c3834_6971529
1560	5B	IWA3640	138.7	wsnp_Ex_c3834_6971470
1561	5B	IWA3644	138.7	wsnp_Ex_c3834_6972322
1562	5B	IWA7378	140	wsnp_Ku_rep_c101212_88410320
1563	5B	IWA6721	140.4	wsnp_Ku_c2185_4218722
1564	5B	IWA6111	149.2	wsnp_JD_c5795_6955031
1565	5B	IWA4003	153.3	wsnp_Ex_c47991_53037623
1566	5B	IWA2373	156.3	wsnp_Ex_c19041_27955460
1567	5B	Xwmc415.2	159
1568	5B	Xgwm71.1	168.7
1569	5B	Xcfd45.1	182.9
1570	5B	Xbarc15.2	187.8
1571	5B	Xgwm335.3	189.4
1572	5B	Xgwm425.1	189.9
1573	5B	Xgwm339.1	189.9
1574	5B	Xcfa2264	189.9
1575	5B	Xgwm448	190.7
1576	5B	Xbarc74	192.8
1577	5B	Xwmc73	194
1578	5B	Xbarc4	195.6
1579	5B	Xbarc216	198.1
1580	5B	IWA5108	201.8	wsnp_Ex_rep_c104041_88855253
1581	5B	IWA4353	201.8	wsnp_Ex_c58012_59490259
1582	5B	IWA4282	201.8	wsnp_Ex_c5598_9855436
1583	5B	IWA4281	201.8	wsnp_Ex_c5598_9854423
1584	5B	IWA2992	201.8	wsnp_Ex_c2571_4784380
1585	5B	IWA7300	201.8	wsnp_Ku_c7872_13484038
1586	5B	IWA7608	202.2	wsnp_Ra_c13424_21239985
1587	5B	IWA7609	202.2	wsnp_Ra_c13424_21239986
1588	5B	IWA1965	202.6	wsnp_Ex_c1498_2868339
1589	5B	IWA1342	202.6	wsnp_Ex_c10543_17223523
1590	5B	IWA1084	202.6	wsnp_CAP7_c3665_1701376
1591	5B	IWA3209	202.6	wsnp_Ex_c2904_5355509
1592	5B	IWA5078	203	wsnp_Ex_rep_c103024_88075347
1593	5B	IWA4378	203	wsnp_Ex_c5915_10378807
1594	5B	IWA4377	203	wsnp_Ex_c5915_10378599
1595	5B	IWA4379	203	wsnp_Ex_c5915_10379277
1596	5B	IWA5079	203	wsnp_Ex_rep_c103024_88075650
1597	5B	IWA1176	203.8	wsnp_CAP8_c2693_1401039
1598	5B	Xgwm540	205.4
1599	5B	IWA6817	206.2	wsnp_Ku_c27243_37190877
1600	5B	IWA6816	206.2	wsnp_Ku_c27243_37190781
1601	5B	IWA6568	206.2	wsnp_Ku_c15630_24304954
1602	5B	IWA6567	206.2	wsnp_Ku_c15630_24304828
1603	5B	IWA6555	206.2	wsnp_Ku_c1535_3032561
1604	5B	IWA6521	206.2	wsnp_Ku_c14252_22506286
1605	5B	IWA6447	206.2	wsnp_Ku_c11980_19464222
1606	5B	IWA6429	206.2	wsnp_Ku_c11721_19085513
1607	5B	IWA6065	206.2	wsnp_JD_c4585_5720296
1608	5B	IWA5494	206.2	wsnp_Ex_rep_c68091_66846454
1609	5B	IWA5334	206.2	wsnp_Ex_rep_c66921_65344887
1610	5B	IWA4708	206.2	wsnp_Ex_c765_1506774
1611	5B	IWA4686	206.2	wsnp_Ex_c7483_12800686
1612	5B	IWA4450	206.2	wsnp_Ex_c6212_10842181
1613	5B	IWA3101	206.2	wsnp_Ex_c27219_36436025
1614	5B	IWA2563	206.2	wsnp_Ex_c20988_30107609
1615	5B	IWA1781	206.2	wsnp_Ex_c13496_21243167
1616	5B	IWA1461	206.2	wsnp_Ex_c11275_18229524
1617	5B	IWA894	206.2	wsnp_CAP11_rep_c8668_3741698
1618	5B	IWA620	206.2	wsnp_BQ166999B_Ta_2_1
1619	5B	IWA279	206.2	wsnp_BE496976B_Ta_2_1
1620	5B	IWA6908	206.2	wsnp_Ku_c32477_42086402
1621	5B	IWA2910	207	wsnp_Ex_c24577_33826666
1622	5B	IWA3870	207.4	wsnp_Ex_c43518_49814933
1623	5B	IWA7944	208.2	wsnp_Ra_c44756_51084202
1624	5B	IWA7389	208.2	wsnp_Ku_rep_c102140_89178676
1625	5B	IWA7127	208.2	wsnp_Ku_c50354_55979952
1626	5B	IWA6980	208.2	wsnp_Ku_c3826_7020960
1627	5B	IWA6810	208.2	wsnp_Ku_c26981_36941556
1628	5B	IWA6369	208.2	wsnp_JG_c926_520103
1629	5B	IWA6027	208.2	wsnp_JD_c37979_27684951
1630	5B	IWA5845	208.2	wsnp_JD_c14223_14014177
1631	5B	IWA5764	208.2	wsnp_Ex_rep_c95506_83475785
1632	5B	IWA5634	208.2	wsnp_Ex_rep_c69760_68719014
1633	5B	IWA5586	208.2	wsnp_Ex_rep_c69124_68035904
1634	5B	IWA5522	208.2	wsnp_Ex_rep_c68270_67062522
1635	5B	IWA4862	208.2	wsnp_Ex_c8985_14979134
1636	5B	IWA4758	208.2	wsnp_Ex_c7988_13555376
1637	5B	IWA3890	208.2	wsnp_Ex_c44230_50338772
1638	5B	IWA3707	208.2	wsnp_Ex_c40022_47169752
1639	5B	IWA3706	208.2	wsnp_Ex_c40022_47169698
1640	5B	IWA3630	208.2	wsnp_Ex_c38105_45710671
1641	5B	IWA3569	208.2	wsnp_Ex_c36242_44232305
1642	5B	IWA3106	208.2	wsnp_Ex_c27272_36480685
1643	5B	IWA2257	208.2	wsnp_Ex_c17768_26519434
1644	5B	IWA1994	208.2	wsnp_Ex_c15262_23482284
1645	5B	IWA1256	208.2	wsnp_CD453913A_Ta_2_1
1646	5B	IWA722	208.2	wsnp_CAP11_c2439_1259299
1647	5B	IWA8491	208.2	wsnp_RFL_Contig3604_3795252
1648	5B	IWA6837	209	wsnp_Ku_c28245_38183393
1649	5B	IWA6291	209	wsnp_JD_rep_c63013_40187485
1650	5B	IWA5485	209	wsnp_Ex_rep_c68023_66768700
1651	5B	IWA5331	209	wsnp_Ex_rep_c66903_65319487
1652	5B	IWA5139	209	wsnp_Ex_rep_c105478_89891634
1653	5B	IWA4622	209	wsnp_Ex_c709_1395347
1654	5B	IWA3436	209	wsnp_Ex_c33455_41940691
1655	5B	IWA3165	209	wsnp_Ex_c28481_37608092
1656	5B	IWA3164	209	wsnp_Ex_c28481_37607810
1657	5B	IWA2791	209	wsnp_Ex_c23238_32474842
1658	5B	IWA1018	209	wsnp_CAP12_rep_c8723_3660715
1659	5B	IWA303	209	wsnp_BE497820B_Ta_2_3
1660	5B	IWA6867	209	wsnp_Ku_c29780_39658445
1661	5B	IWA4836	209.4	wsnp_Ex_c8676_14535174
1662	5B	IWA4757	209.4	wsnp_Ex_c7988_13555166
1663	5B	IWA4414	209.4	wsnp_Ex_c60683_61038062
1664	5B	IWA2320	209.4	wsnp_Ex_c18519_27369737
1665	5B	IWA2071	209.4	wsnp_Ex_c15858_24246431
1666	5B	IWA1706	209.4	wsnp_Ex_c12909_20457660
1667	5B	IWA6526	209.4	wsnp_Ku_c14332_22613741
1668	5B	IWA123	209.8	wsnp_BE443187B_Ta_2_1
1669	5B	IWA265	209.8	wsnp_BE495277B_Ta_2_5
1670	5B	IWA302	209.8	wsnp_BE497820B_Ta_2_2
1671	5B	IWA309	209.8	wsnp_be498599A_Ta_2_2
1672	5B	IWA314	209.8	wsnp_BE498730A_Ta_2_2
1673	5B	IWA396	209.8	wsnp_BE606403B_Ta_2_1
1674	5B	IWA588	209.8	wsnp_BG608232B_Ta_2_1
1675	5B	IWA721	209.8	wsnp_CAP11_c2439_1259157
1676	5B	IWA822	209.8	wsnp_CAP11_c948_571287
1677	5B	IWA1057	209.8	wsnp_CAP7_c2086_1018815
1678	5B	IWA1155	209.8	wsnp_CAP8_c1594_914839
1679	5B	IWA1471	209.8	wsnp_Ex_c113235_94249366
1680	5B	IWA1532	209.8	wsnp_Ex_c11728_18862315
1681	5B	IWA1533	209.8	wsnp_Ex_c11728_18862431
1682	5B	IWA1597	209.8	wsnp_Ex_c12219_19526749
1683	5B	IWA1705	209.8	wsnp_Ex_c12909_20457407
1684	5B	IWA1772	209.8	wsnp_Ex_c13409_21124830
1685	5B	IWA2245	209.8	wsnp_Ex_c1767_3341220
1686	5B	IWA2259	209.8	wsnp_Ex_c1782_3365844
1687	5B	IWA2432	209.8	wsnp_Ex_c19542_28513205
1688	5B	IWA2455	209.8	wsnp_Ex_c19724_28721580
1689	5B	IWA2503	209.8	wsnp_Ex_c20032_29065889
1690	5B	IWA2531	209.8	wsnp_Ex_c20370_29434410
1691	5B	IWA2537	209.8	wsnp_Ex_c20445_29515644
1692	5B	IWA2596	209.8	wsnp_Ex_c2132_4004831
1693	5B	IWA2597	209.8	wsnp_Ex_c2132_4006417
1694	5B	IWA2605	209.8	wsnp_Ex_c2138_4015881
1695	5B	IWA3056	209.8	wsnp_Ex_c26616_35855805
1696	5B	IWA3633	209.8	wsnp_Ex_c3817_6937184
1697	5B	IWA3802	209.8	wsnp_Ex_c41913_48628356
1698	5B	IWA3803	209.8	wsnp_Ex_c41913_48628389
1699	5B	IWA3842	209.8	wsnp_Ex_c42815_49298013
1700	5B	IWA3985	209.8	wsnp_Ex_c47152_52446529
1701	5B	IWA4015	209.8	wsnp_Ex_c48257_53217539
1702	5B	IWA4026	209.8	wsnp_Ex_c4847_8646583
1703	5B	IWA4158	209.8	wsnp_Ex_c53011_56395185
1704	5B	IWA4300	209.8	wsnp_Ex_c5632_9904112
1705	5B	IWA4410	209.8	wsnp_Ex_c60588_60977198
1706	5B	IWA4422	209.8	wsnp_Ex_c6100_10676217
1707	5B	IWA4494	209.8	wsnp_Ex_c6391_11109898
1708	5B	IWA5037	209.8	wsnp_Ex_rep_c101866_87158671
1709	5B	IWA5092	209.8	wsnp_Ex_rep_c103255_88258450
1710	5B	IWA5187	209.8	wsnp_Ex_rep_c66270_64420396
1711	5B	IWA5188	209.8	wsnp_Ex_rep_c66270_64420584
1712	5B	IWA5217	209.8	wsnp_Ex_rep_c66375_64566329
1713	5B	IWA5219	209.8	wsnp_Ex_rep_c66377_64570189
1714	5B	IWA5438	209.8	wsnp_Ex_rep_c67690_66354563
1715	5B	IWA5439	209.8	wsnp_Ex_rep_c67690_66354791
1716	5B	IWA5440	209.8	wsnp_Ex_rep_c67690_66354931
1717	5B	IWA5486	209.8	wsnp_Ex_rep_c68023_66768770
1718	5B	IWA5585	209.8	wsnp_Ex_rep_c69124_68035485
1719	5B	IWA5633	209.8	wsnp_Ex_rep_c69760_68718561
1720	5B	IWA5743	209.8	wsnp_Ex_rep_c75281_72691771
1721	5B	IWA5744	209.8	wsnp_Ex_rep_c75827_73041653
1722	5B	IWA5922	209.8	wsnp_JD_c2099_2896804
1723	5B	IWA6030	209.8	wsnp_JD_c38123_27754848
1724	5B	IWA6139	209.8	wsnp_JD_c6436_7600132
1725	5B	IWA6332	209.8	wsnp_JG_c2301_1078403
1726	5B	IWA6514	209.8	wsnp_Ku_c14099_22301373
1727	5B	IWA6638	209.8	wsnp_Ku_c17875_27051169
1728	5B	IWA6689	209.8	wsnp_Ku_c20701_30355248
1729	5B	IWA7123	209.8	wsnp_Ku_c49907_55670146
1730	5B	IWA7227	209.8	wsnp_Ku_c6464_11320381
1731	5B	IWA7248	209.8	wsnp_Ku_c6826_11860405
1732	5B	IWA7272	209.8	wsnp_Ku_c7199_12444840
1733	5B	IWA7336	209.8	wsnp_Ku_c8765_14824678
1734	5B	IWA7705	209.8	wsnp_Ra_c19526_28719561
1735	5B	IWA7969	209.8	wsnp_Ra_c4850_8698731
1736	5B	IWA8005	209.8	wsnp_Ra_c5634_9952011
1737	5B	IWA8502	209.8	wsnp_RFL_Contig3703_3939941
1738	5B	IWA7636	209.8	wsnp_Ra_c15297_23684845
1739	5B	IWA8569	209.8	wsnp_RFL_Contig4207_4836784
1740	5B	IWA2733	210.2	wsnp_Ex_c22651_31851893
1741	5B	IWA5378	210.2	wsnp_Ex_rep_c67264_65795361
1742	5B	IWA2907	211.5	wsnp_Ex_c24523_33770410
1743	5B	IWA562	215.1	wsnp_BG314532A_Ta_2_1
1744	5B	IWA5023	216.8	wsnp_Ex_rep_c101526_86881619
1745	5B	IWA5022	216.8	wsnp_Ex_rep_c101526_86881496
1746	5B	IWA5893	216.8	wsnp_JD_c18695_17091254
1747	5B	Xwmc661	224.1
1748	5B	Xwmc522	224.9
1749	5B	IWA2731	227.9	wsnp_Ex_c22645_31845564
1750	5B	IWA2730	227.9	wsnp_Ex_c22645_31845530
1751	5B	IWA2067	227.9	wsnp_Ex_c15822_24204224
1752	5B	IWA8424	227.9	wsnp_RFL_Contig3085_3007861
1753	5B	IWA630	229.5	wsnp_JD_rep_c63810_40704815
1754	5B	IWA6250	235.5	wsnp_JD_rep_c48914_33168544
1755	5B	IWA3520	239.3	wsnp_Ex_c35331_43499339
1756	5B	IWA6384	239.3	wsnp_Ku_c10302_17079851
1757	5B	IWA2797	240.6	wsnp_RFL_Contig4270_4938701
1758	5B	IWA2798	240.6	wsnp_RFL_Contig429_4978628
1759	5B	IWA4213	245.4	wsnp_Ex_c5412_9564346
1760	5B	IWA4216	246.6	wsnp_Ex_c5412_9565527
1761	5B	IWA4215	246.6	wsnp_Ex_c5412_9564550
1762	5B	IWA4214	246.6	wsnp_Ex_c5412_9564478
1763	5B	IWA4212	246.6	wsnp_Ex_c5412_9564046
1764	5B	IWA4217	246.6	wsnp_Ex_c5412_9565733
1765	5B	IWA7276	247	wsnp_Ku_c7266_12551048
1766	5B	IWA2059	255.3	wsnp_Ex_c15740_24096817
1767	5B	IWA7410	255.3	wsnp_Ku_rep_c104307_90809337
1768	5B	IWA2696	256.1	wsnp_Ex_c22202_31392780
1769	5B	Xgwm69	291.4
1770	5B	IWA488	295.1	wsnp_BF475068A_Ta_2_1
1771	5B	IWA1174	295.1	wsnp_CAP8_c2677_1394934
1772	5B	IWA2807	297.2	wsnp_Ex_c2337_4379619
1773	5B	IWA3151	299.7	wsnp_Ex_c28204_37349164
1774	5B	IWA69	300.9	wsnp_BE406351A_Ta_2_1
1775	5B	IWA33	300.9	wsnp_BE403597A_Ta_2_2
1776	5B	IWA32	300.9	wsnp_BE403597A_Ta_2_1
1777	5B	IWA70	300.9	wsnp_BE406351A_Ta_2_2
1778	5B	IWA6946	312.1	wsnp_Ku_c35090_44349446
1779	5B	IWA3211	312.1	wsnp_Ex_c29061_38130966
1780	5B	IWA6947	312.1	wsnp_Ku_c35090_44349517
1781	5B	IWA421	319.2	wsnp_BF201102B_Ta_2_5
1782	5B	IWA5537	331.9	wsnp_Ex_rep_c68504_67334656
1783	5B	IWA5536	331.9	wsnp_Ex_rep_c68504_67334573
1784	5B	IWA3457	331.9	wsnp_Ex_c33932_42333941
1785	5B	IWA7400	331.9	wsnp_Ku_rep_c103274_90057407
1786	5B	IWA6402	332.3	wsnp_Ku_c10586_17464696
1787	5B	IWA4415	332.3	wsnp_Ex_c607_1204733
1788	5B	IWA4790	332.3	wsnp_Ex_c831_1625061
1789	5B	Xgwm234	342.8
1790	5B	IWA4896	347.4	wsnp_Ex_c9301_15450818
1791	5B	IWA8618	347.4	wsnp_RFL_Contig4724_5649634
1792	5D	Xgwm301.2	0
1793	5D	Xgwm273	7.8
1794	5D	Xgwm654	17.8
1795	5D	Xgwm565	21.3
1796	5D	Xwmc765	30
1797	5D	IWA2276	31.7	wsnp_Ex_c17928_26697183
1798	5D	IWA6872	31.7	wsnp_Ku_c3022_5674299
1799	5D	IWA7147	31.7	wsnp_Ku_c5228_9318604
1800	5D	IWA6190	34.2	wsnp_JD_c825_1223454
1801	5D	IWA6189	34.2	wsnp_JD_c825_1223424
1802	5D	IWA6191	34.2	wsnp_JD_c825_1223506
1803	5D	IWA766	34.2	wsnp_CAP11_c442_324312
1804	5D	IWA6409	36.3	wsnp_Ku_c10877_17896883
1805	5D	IWA2821	36.3	wsnp_Ex_c23618_32855041
1806	5D	IWA7177	36.3	wsnp_Ku_c55961_59662821
1807	5D	Xgwm358	0
1808	5D	Xgwm161	2.6
1809	5D	IWA6052	5.1	wsnp_JD_c43684_30430706
1810	5D	IWA4550	5.1	wsnp_Ex_c65985_64188864
1811	5D	IWA7517	5.6	wsnp_Ku_rep_c72922_72561803
1812	5D	Xcfd40	11.1
1813	5D	IWA1681	0	wsnp_Ex_c1278_2449191
1814	5D	Xcfd26.2	11.8
1815	5D	Xcfd57	16.8
1816	5D	Xcfd102	17.7
1817	6A	IWA1391	0	wsnp_Ex_c10824_17611901
1818	6A	IWA1868	0.4	wsnp_Ex_c14156_22088799
1819	6A	IWA1867	0.4	wsnp_Ex_c14156_22088738
1820	6A	IWA2795	0.4	wsnp_Ex_c2325_4355706
1821	6A	IWA4747	2.2	wsnp_Ex_c791_1557333
1822	6A	IWA6543	2.2	wsnp_Ku_c14920_23377027
1823	6A	IWA4233	4.9	wsnp_Ex_c5446_9616983
1824	6A	IWA2633	4.9	wsnp_Ex_c2161_4059916
1825	6A	IWA2632	4.9	wsnp_Ex_c2161_4059735
1826	6A	IWA5172	4.9	wsnp_Ex_rep_c109274_92142043
1827	6A	IWA7386	5.7	wsnp_Ku_rep_c102077_89125383
1828	6A	IWA6305	5.7	wsnp_JD_rep_c64119_40899071
1829	6A	IWA6304	5.7	wsnp_JD_rep_c64088_40878029
1830	6A	IWA5974	5.7	wsnp_JD_c2755_3691183
1831	6A	IWA5768	5.7	wsnp_Ex_rep_c98716_85135069
1832	6A	IWA5767	5.7	wsnp_Ex_rep_c98716_85134786
1833	6A	IWA5746	5.7	wsnp_Ex_rep_c76495_73453820
1834	6A	IWA3918	5.7	wsnp_Ex_c449_878476
1835	6A	IWA2639	5.7	wsnp_Ex_c21688_30847181
1836	6A	IWA2054	5.7	wsnp_Ex_c15708_24056750
1837	6A	IWA1510	5.7	wsnp_Ex_c1153_2213588
1838	6A	IWA7894	5.7	wsnp_Ra_c36410_44760538
1839	6A	IWA2603	6.9	wsnp_Ex_c21374_30504135
1840	6A	IWA2567	6.9	wsnp_Ex_c21010_30133755
1841	6A	IWA2527	6.9	wsnp_Ex_c20352_29416468
1842	6A	IWA2055	6.9	wsnp_Ex_c15708_24057812
1843	6A	IWA5747	6.9	wsnp_Ex_rep_c76495_73453891
1844	6A	IWA6538	8.3	wsnp_Ku_c1468_2913072
1845	6A	IWA6865	9.7	wsnp_Ku_c2956_5558854
1846	6A	IWA6863	9.7	wsnp_Ku_c2956_5557990
1847	6A	IWA6537	9.7	wsnp_Ku_c1468_2912654
1848	6A	IWA6316	9.7	wsnp_JD_rep_c65886_41872083
1849	6A	IWA5655	9.7	wsnp_Ex_rep_c69900_68862375
1850	6A	IWA3066	9.7	wsnp_Ex_c26771_35998435
1851	6A	IWA7747	9.7	wsnp_Ra_c21546_30949373
1852	6A	Xgwm427	14.3
1853	6A	IWA441	16.1	wsnp_BF291974A_Ta_2_1
1854	6A	IWA5704	24.8	wsnp_Ex_rep_c70675_69579757
1855	6A	IWA6116	24.8	wsnp_JD_c5872_7032077
1856	6A	IWA4278	28.3	wsnp_RFL_Contig4025_4499792
1857	6A	IWA3487	35.1	wsnp_Ex_c34597_42879693
1858	6A	IWA2705	35.1	wsnp_Ex_c2236_4189774
1859	6A	IWA3488	35.1	wsnp_Ex_c34597_42879718
1860	6A	IWA5398	37.2	wsnp_Ex_rep_c67436_66026057
1861	6A	IWA5035	37.2	wsnp_Ex_rep_c101766_87073440
1862	6A	IWA4809	37.2	wsnp_Ex_c8510_14306239
1863	6A	IWA2539	37.2	wsnp_Ex_c20457_29526403
1864	6A	IWA2538	37.2	wsnp_Ex_c20457_29526260
1865	6A	IWA2481	37.2	wsnp_Ex_c19928_28951983
1866	6A	IWA7994	37.2	wsnp_Ra_c5346_9501281
1867	6A	IWA6355	38.4	wsnp_JG_c474_302785
1868	6A	IWA5783	38.4	wsnp_JD_c11443_11907542
1869	6A	IWA7764	38.4	wsnp_Ra_c2270_4383252
1870	6A	IWA5142	67.7	wsnp_Ex_rep_c105594_89968727
1871	6A	IWA3491	67.7	wsnp_Ex_c34641_42914170
1872	6A	IWA7366	67.7	wsnp_Ku_c9763_16287132
1873	6A	IWA260	68.5	wsnp_BE495143A_Ta_2_2
1874	6A	IWA259	68.5	wsnp_BE495143A_Ta_2_1
1875	6A	IWA4949	68.5	wsnp_Ex_c965_1845447
1876	6A	Xwmc179	68.9
1877	6A	IWA6550	79.5	wsnp_Ku_c15096_23605606
1878	6A	IWA5719	79.5	wsnp_Ex_rep_c70951_69806455
1879	6A	IWA4112	79.5	wsnp_Ex_c51820_55631560
1880	6A	IWA4111	79.5	wsnp_Ex_c51820_55631329
1881	6A	IWA3585	79.5	wsnp_Ex_c36801_44683992
1882	6A	IWA7063	79.5	wsnp_Ku_c44079_51438574
1883	6A	IWA5718	81.1	wsnp_Ex_rep_c70951_69806211
1884	6A	IWA5717	81.1	wsnp_Ex_rep_c70951_69805840
1885	6A	IWA6406	81.1	wsnp_Ku_c10877_17896883
1886	6A	Xwmc256	96.6
1887	6A	IWA4928	101.8	wsnp_Ex_c9502_15748251
1888	6A	IWA6938	102.2	wsnp_Ku_c3450_6387847
1889	6A	IWA6812	102.2	wsnp_Ku_c2700_5121383
1890	6A	IWA6811	102.2	wsnp_Ku_c2700_5121331
1891	6A	IWA6699	102.2	wsnp_Ku_c21021_30712963
1892	6A	IWA4865	102.2	wsnp_Ex_c902_1745108
1893	6A	IWA4929	102.2	wsnp_Ex_c9502_15748469
1894	6A	IWA3269	102.2	wsnp_Ex_c30264_39202224
1895	6A	IWA2192	102.2	wsnp_Ex_c17185_25829084
1896	6A	IWA1514	102.2	wsnp_Ex_c11578_18655261
1897	6A	IWA1475	102.2	wsnp_Ex_c11348_18327861
1898	6A	IWA1474	102.2	wsnp_Ex_c11348_18326787
1899	6A	IWA7666	102.2	wsnp_Ra_c17221_26052231
1900	6A	IWA1235	102.6	wsnp_CAP8_rep_c5136_2472055
1901	6A	IWA4737	102.6	wsnp_Ex_c7844_13341797
1902	6A	IWA5459	102.6	wsnp_Ex_rep_c67819_66516786
1903	6A	IWA1194	102.6	wsnp_CAP8_c4597_2237727
1904	6A	IWA1112	102.6	wsnp_CAP7_rep_c10136_4493502
1905	6A	IWA879	102.6	wsnp_CAP11_rep_c6492_2992504
1906	6A	IWA741	102.6	wsnp_CAP11_c303_253438
1907	6A	IWA653	102.6	wsnp_CAP11_c1155_673549
1908	6A	IWA651	102.6	wsnp_CAP11_c1137_665340
1909	6A	IWA650	102.6	wsnp_CAP11_c1137_665073
1910	6A	IWA281	102.6	wsnp_BE496986A_Ta_2_1
1911	6A	IWA218	102.6	wsnp_BE490147A_Ta_2_1
1912	6A	IWA1011	102.6	wsnp_CAP12_rep_c4851_2209148
1913	6A	IWA7563	102.6	wsnp_Ra_c11269_18309313
1914	6A	IWA38	103	wsnp_BE403818A_Ta_2_1
1915	6A	IWA6724	103.8	wsnp_Ku_c22358_32187765
1916	6A	IWA8585	103.8	wsnp_RFL_Contig4353_5066954
1917	6A	IWA664	104.2	wsnp_CAP11_c1244_714229
1918	6A	IWA3463	108.5	wsnp_Ex_c341_667884
1919	6A	IWA2812	108.5	wsnp_Ex_c2350_4403690
1920	6A	IWA6962	108.5	wsnp_Ku_c36874_45825785
1921	6A	IWA7431	114	wsnp_Ku_rep_c112734_95776957
1922	6A	IWA2367	118.5	wsnp_Ex_c18965_27868923
1923	6A	IWA215	118.9	wsnp_BE489896A_Ta_2_1
1924	6A	IWA388	118.9	wsnp_BE604721A_Ta_2_1
1925	6A	IWA1423	118.9	wsnp_Ex_c1104_2118684
1926	6A	IWA1498	118.9	wsnp_Ex_c11446_18468102
1927	6A	IWA1606	118.9	wsnp_Ex_c12288_19625413
1928	6A	IWA2033	118.9	wsnp_Ex_c1556_2972134
1929	6A	IWA2034	118.9	wsnp_Ex_c1556_2972715
1930	6A	IWA2186	118.9	wsnp_Ex_c17089_25708638
1931	6A	IWA2187	118.9	wsnp_Ex_c17089_25709028
1932	6A	IWA2188	118.9	wsnp_Ex_c17089_25709221
1933	6A	IWA2366	118.9	wsnp_Ex_c18965_27868480
1934	6A	IWA2421	118.9	wsnp_Ex_c19476_28434084
1935	6A	IWA2805	118.9	wsnp_Ex_c23362_32606998
1936	6A	IWA3227	118.9	wsnp_Ex_c29350_38393488
1937	6A	IWA3356	118.9	wsnp_Ex_c31711_40468407
1938	6A	IWA3529	118.9	wsnp_Ex_c3559_6506541
1939	6A	IWA3879	118.9	wsnp_Ex_c43887_50077773
1940	6A	IWA4059	118.9	wsnp_Ex_c4954_8813973
1941	6A	IWA4371	118.9	wsnp_Ex_c590_1176609
1942	6A	IWA4607	118.9	wsnp_Ex_c7004_12067464
1943	6A	IWA5057	118.9	wsnp_Ex_rep_c102173_87395725
1944	6A	IWA5143	118.9	wsnp_Ex_rep_c105612_89983181
1945	6A	IWA7940	118.9	wsnp_Ra_c44015_50539749
1946	6A	IWA7847	118.9	wsnp_Ra_c31062_40243185
1947	6A	IWA7492	118.9	wsnp_Ku_rep_c71238_70957970
1948	6A	IWA7458	118.9	wsnp_Ku_rep_c69707_69144358
1949	6A	IWA7438	118.9	wsnp_Ku_rep_c68351_67302372
1950	6A	IWA7354	118.9	wsnp_Ku_c9388_15743434
1951	6A	IWA7323	118.9	wsnp_Ku_c8394_14267750
1952	6A	IWA6928	118.9	wsnp_Ku_c3354_6228863
1953	6A	IWA6927	118.9	wsnp_Ku_c3354_6228393
1954	6A	IWA6737	118.9	wsnp_Ku_c2329_4474766
1955	6A	IWA6560	118.9	wsnp_Ku_c1549_3054996
1956	6A	IWA6559	118.9	wsnp_Ku_c1549_3054872
1957	6A	IWA6276	118.9	wsnp_JD_rep_c51547_35074931
1958	6A	IWA6084	118.9	wsnp_JD_c5028_6151168
1959	6A	IWA5712	118.9	wsnp_Ex_rep_c70831_69710520
1960	6A	IWA5656	118.9	wsnp_Ex_rep_c69901_68864080
1961	6A	IWA5470	118.9	wsnp_Ex_rep_c67908_66629238
1962	6A	IWA5441	118.9	wsnp_Ex_rep_c67692_66357763
1963	6A	IWA5376	118.9	wsnp_Ex_rep_c67218_65729639
1964	6A	IWA28	118.9	wsnp_BE403421A_Ta_2_1
1965	6A	IWA4370	119.7	wsnp_Ex_c590_1176006
1966	6A	IWA3782	119.7	wsnp_Ex_c41551_48349585
1967	6A	IWA1285	119.7	wsnp_Ex_c10120_16626785
1968	6A	IWA5421	119.7	wsnp_Ex_rep_c67605_66248628
1969	6A	IWA416	120.9	wsnp_BF200644A_Ta_1_1
1970	6A	Xgwm132.1	125.8
1971	6A	Xbarc1055	129.5
1972	6A	Xwmc398.1	141
1973	6A	IWA5075	143.9	wsnp_Ex_rep_c102845_87922204
1974	6A	IWA5466	144.3	wsnp_Ex_rep_c67878_66584488
1975	6A	IWA4147	144.3	wsnp_Ex_c52577_56128947
1976	6A	IWA3525	144.3	wsnp_Ex_c35465_43610634
1977	6A	IWA1956	144.3	wsnp_Ex_c14897_23032260
1978	6A	IWA7295	144.3	wsnp_Ku_c7794_13356946
1979	6A	IWA731	145.6	wsnp_CAP11_c2817_1415793
1980	6A	IWA1589	149	wsnp_Ex_c12141_19415226
1981	6A	IWA1903	149	wsnp_Ex_c14502_22512364
1982	6A	IWA5239	149.8	wsnp_Ex_rep_c66433_64662690
1983	6A	IWA5238	149.8	wsnp_Ex_rep_c66433_64661643
1984	6A	IWA1875	149.8	wsnp_Ex_c14192_22135384
1985	6A	IWA1874	149.8	wsnp_Ex_c14192_22135363
1986	6A	IWA1873	149.8	wsnp_Ex_c14192_22135125
1987	6A	IWA1276	149.8	wsnp_Ex_c10087_16579529
1988	6A	IWA1049	149.8	wsnp_CAP7_c1839_908011
1989	6A	IWA1048	149.8	wsnp_CAP7_c1839_907899
1990	6A	IWA902	149.8	wsnp_CAP11_rep_c8811_3803397
1991	6A	IWA6311	149.8	wsnp_JD_rep_c65080_41454656
1992	6A	IWA233	155.9	wsnp_BE490604A_Ta_2_1
1993	6A	IWA2017	157.6	wsnp_Ex_c15378_23638822
1994	6A	IWA1086	157.6	wsnp_CAP7_c399_215824
1995	6A	IWA2018	157.6	wsnp_Ex_c15378_23639387
1996	6A	IWA5930	158.1	wsnp_JD_c2180_3000498
1997	6A	IWA3321	163.3	wsnp_Ex_c31149_39976066
1998	6A	IWA3322	163.3	wsnp_Ex_c31149_39976103
1999	6A	Xbarc23	175.4
[truncated: 655 more rows]

## Sheet: Heyne x Lakin map
No.	Chromosome	Marker index	Genetic distance(Kosambi,cM)	Marker
1	1A	IWA3661	0	wsnp_Ex_c3887_7051325
2	1A	IWA4122	1.6	wsnp_Ex_c52086_55808363
3	1A	IWA4121	1.6	wsnp_Ex_c52086_55808193
4	1A	IWA4120	1.6	wsnp_Ex_c52086_55808126
5	1A	IWA5405	1.6	wsnp_Ex_rep_c67474_66076379
6	1A	IWA4123	3	wsnp_Ex_c52086_55808824
7	1A	IWA6916	3.9	wsnp_Ku_c330_683203
8	1A	IWA1645	3.9	wsnp_Ex_c1255_2411977
9	1A	IWA3764	4.6	wsnp_Ex_c412_814247
10	1A	IWA2327	7.5	wsnp_Ex_c1861_3507281
11	1A	IWA8523	7.8	wsnp_RFL_Contig3850_4199825
12	1A	Xcfa2147	35
13	1A	Xwmc716	35
14	1A	Xcfa2219	35
15	1A	IWA7428	39.1	wsnp_Ku_rep_c109724_94227136
16	1A	IWA5900	39.1	wsnp_JD_c19419_17536513
17	1A	IWA4934	39.1	wsnp_Ex_c9546_15810886
18	1A	IWA3284	39.1	wsnp_Ex_c30552_39457767
19	1A	IWA2819	39.1	wsnp_Ex_c23598_32827681
20	1A	IWA2818	39.1	wsnp_Ex_c23598_32826926
21	1A	IWA1587	39.1	wsnp_Ex_c12123_19388313
22	1A	IWA1404	39.1	wsnp_Ex_c10903_17717179
23	1A	IWA672	39.1	wsnp_CAP11_c146_160903
24	1A	IWA475	39.1	wsnp_BF474340A_Ta_2_1
25	1A	IWA7591	39.1	wsnp_Ra_c12759_20345987
26	1A	IWA5505	39.8	wsnp_Ex_rep_c68171_66944702
27	1A	IWA5046	43.1	wsnp_Ex_rep_c102067_87313597
28	1A	IWA5047	43.1	wsnp_Ex_rep_c102067_87314043
29	1A	IWA7754	48.4	wsnp_Ra_c22110_31550370
30	1A	IWA577	49.8	wsnp_BG606986A_Ta_2_1
31	1A	IWA578	49.8	wsnp_BG606986A_Ta_2_4
32	1A	IWA5832	50.9	wsnp_JD_c13384_13393159
33	1A	IWA1081	52.3	wsnp_CAP7_c3472_1623955
34	1A	IWA8212	54.8	wsnp_Ra_rep_c95460_83855592
35	1A	IWA5534	57.3	wsnp_Ex_rep_c68493_67320068
36	1A	IWA3405	57.3	wsnp_Ex_c3258_6004611
37	1A	IWA7570	57.3	wsnp_Ra_c11594_18777085
38	1A	IWA5493	57.8	wsnp_Ex_rep_c68085_66839109
39	1A	IWA3859	58.2	wsnp_Ex_c43228_49605281
40	1A	IWA339	59.9	wsnp_BE517729A_Ta_2_1
41	1A	IWA601	70.1	wsnp_BM137879A_Ta_2_1
42	1A	IWA6595	78.2	wsnp_Ku_c1642_3232242
43	1A	IWA2540	79	wsnp_Ex_c20489_29564938
44	1A	IWA4511	79	wsnp_Ex_c6452_11213329
45	1A	IWA7898	89	wsnp_Ra_c37745_45806931
46	1A	IWA6756	89	wsnp_Ku_c24239_34199356
47	1A	IWA6751	89	wsnp_Ku_c23926_33870364
48	1A	IWA6709	89	wsnp_Ku_c21356_31093507
49	1A	IWA5277	89	wsnp_Ex_rep_c66628_64934660
50	1A	IWA4816	89	wsnp_Ex_c8588_14419007
51	1A	IWA4117	89	wsnp_Ex_c5192_9203682
52	1A	IWA3477	89	wsnp_Ex_c34344_42677360
53	1A	IWA16	89	wsnp_BE403597B_Ta_1_1
54	1A	IWA7018	90.5	wsnp_Ku_c39878_48218985
55	1A	IWA4116	90.5	wsnp_Ex_c5192_9203682
56	1A	IWA3891	90.5	wsnp_Ex_c44263_50363536
57	1A	IWA3820	90.5	wsnp_Ex_c42282_48900922
58	1A	IWA3613	90.5	wsnp_Ex_c37470_45211843
59	1A	IWA3475	90.5	wsnp_Ex_c34344_42676379
60	1A	IWA3134	90.5	wsnp_Ex_c27940_37101775
61	1A	IWA1608	90.5	wsnp_Ex_c12336_19686808
62	1A	IWA1594	90.5	wsnp_Ex_c12165_19452361
63	1A	IWA7577	90.5	wsnp_Ra_c12148_19539667
64	1A	IWA1142	97.3	wsnp_CAP8_c1141_707721
65	1A	IWA5339	97.3	wsnp_Ex_rep_c66980_65419811
66	1A	IWA5866	101.4
67	1A	IWA6431	101.4	wsnp_Ku_c11769_19153951
68	1A	IWA217	102.6	wsnp_BE490041A_Ta_2_1
69	1A	IWA6941	105.6	wsnp_Ku_c34659_43981982
70	1A	IWA3374	106.9	wsnp_Ex_c31983_40709866
71	1A	IWA3373	106.9	wsnp_Ex_c31983_40709607
72	1A	IWA7151	106.9	wsnp_Ku_c52464_57427549
73	1A	IWA1724	107.7	wsnp_Ex_c1309_2502521
74	1A	IWA3375	110.8	wsnp_Ex_c31983_40710608
75	1A	IWA6217	113.5	wsnp_JD_c9290_10155594
76	1A	Xwmc24	118.2
77	1A	Xcfa2153	149.7
78	1A	IWA3182	155.9	wsnp_Ex_c2868_5293485
79	1A	IWA4524	156.2	wsnp_Ex_c64882_63506752
80	1A	IWA7559	156.9	wsnp_Ra_c11211_18227610
81	1A	IWA6644	156.9	wsnp_Ku_c1818_3557408
82	1A	IWA5065	156.9	wsnp_Ex_rep_c102387_87569964
83	1A	IWA3181	156.9	wsnp_Ex_c2868_5293115
84	1A	IWA3180	156.9	wsnp_Ex_c2868_5293000
85	1A	IWA3179	156.9	wsnp_Ex_c2868_5292662
86	1A	IWA1603	156.9	wsnp_Ex_c12254_19575022
87	1A	IWA1602	156.9	wsnp_Ex_c12254_19574891
88	1A	IWA8622	156.9	wsnp_RFL_Contig4735_5673999
89	1A	IWA6649	158.3	wsnp_Ku_c183_358844
90	1A	IWA6444	158.3
91	1A	IWA5150	158.3	wsnp_Ex_rep_c106111_90308719
92	1A	IWA4505	158.3	wsnp_Ex_c6420_11162653
93	1A	IWA4351	158.3	wsnp_Ex_c57982_59470152
94	1A	IWA1970	158.3	wsnp_Ex_c15006_23165707
95	1A	IWA8409	158.3
96	1A	IWA1375	159	wsnp_Ex_c10657_17376086
97	1A	IWA6645	159	wsnp_Ku_c1818_3557849
98	1A	IWA6421	160.4	wsnp_Ku_c11447_18691457
99	1A	IWA7051	160.4	wsnp_Ku_c42925_50551343
100	1A	IWA3635	162.5	wsnp_Ex_c38203_45790396
101	1A	IWA1481	163.3	wsnp_Ex_c1137_2183772
102	1A	IWA414	165	wsnp_BF200531A_Ta_2_1
103	1A	IWA4350	166.7	wsnp_Ex_c5780_10154132
104	1A	IWA98	166.7	wsnp_BE438866A_Ta_2_8
105	1A	IWA3224	167.8	wsnp_Ex_c293_568283
106	1A	IWA7191	167.8	wsnp_Ku_c5756_10191339
107	1A	IWA6172	168.5	wsnp_JD_c7522_8606553
108	1A	IWA4753	168.5	wsnp_Ex_c7965_13519586
109	1A	IWA6889	168.5	wsnp_Ku_c3097_5801027
110	1A	IWA5976	169.2	wsnp_JD_c2805_3748370
111	1B	IWA7399	0	wsnp_Ku_rep_c103074_89905152
112	1B	IWA7398	0	wsnp_Ku_rep_c103074_89904851
113	1B	IWA1883	23.1	wsnp_Ex_c14273_22230844
114	1B	IWA361	30.4	wsnp_BE586140B_Ta_2_1
115	1B	IWA1578	30.4	wsnp_Ex_c12063_19310114
116	1B	IWA7480	32.2	wsnp_Ku_rep_c70742_70379526
117	1B	IWA6450	32.2	wsnp_Ku_c11987_19473636
118	1B	IWA6449	32.2	wsnp_Ku_c11987_19473555
119	1B	IWA6448	32.2	wsnp_Ku_c11987_19472688
120	1B	IWA3155	32.2	wsnp_Ex_c28287_37424983
121	1B	IWA7703	32.2	wsnp_Ra_c19335_28504388
122	1B	IWA1948	33.2	wsnp_Ex_c14832_22953585
123	1B	IWA4504	33.2	wsnp_Ex_c6417_11155739
124	1B	IWA2998	35.4	wsnp_Ex_c25782_35041189
125	1B	IWA7578	38.2	wsnp_Ra_c12151_19543036
126	1B	IWA131	43	wsnp_BE443531B_Ta_1_1
127	1B	IWA8148	45.6	wsnp_Ra_rep_c111777_93910754
128	1B	IWA8081	48.2	wsnp_Ra_c8484_14372772
129	1B	IWA7594	48.2	wsnp_Ra_c12888_20519578
130	1B	IWA7119	48.2	wsnp_Ku_c4951_8856170
131	1B	IWA6063	48.2	wsnp_JD_c4485_5618761
132	1B	IWA8082	48.2	wsnp_Ra_c8484_14372815
133	1B	IWA890	48.5	wsnp_Ex_c15378_23638822
134	1B	IWA4197	48.5	wsnp_Ex_c5388_9526777
135	1B	IWA6684	48.8	wsnp_Ku_c20139_29729256
136	1B	IWA6073	48.8	wsnp_JD_c4641_5774711
137	1B	IWA5348	48.8	wsnp_Ex_rep_c67036_65492436
138	1B	IWA4198	48.8	wsnp_Ex_c5388_9527189
139	1B	IWA2221	48.8	wsnp_Ex_c17452_26163465
140	1B	IWA6758	48.8	wsnp_Ku_c24323_34285350
141	1B	IWA4987	49.2	wsnp_Ex_c9960_16397347
142	1B	IWA6107	50.7	wsnp_JD_c5659_6814240
143	1B	IWA5779	52.7	wsnp_JD_c11014_11565501
144	1B	IWA1959	52.7	wsnp_Ex_c1495_2864718
145	1B	IWA573	52.7	wsnp_Ex_c10988_17836981
146	1B	IWA7787	52.7	wsnp_Ra_c25590_35156699
147	1B	IWA5076	53	wsnp_Ex_rep_c102909_87976721
148	1B	IWA2861	53	wsnp_Ex_c23992_33235984
149	1B	IWA5568	53	wsnp_Ex_rep_c68857_67737959
150	1B	IWA1005	53.3	wsnp_CAP12_rep_c4157_1894383
151	1B	IWA775	53.3	wsnp_CAP11_c543_375403
152	1B	IWA1231	53.3	wsnp_CAP8_rep_c4452_2170021
153	1B	IWA854	53.6	wsnp_CAP11_rep_c4185_1977142
154	1B	IWA4680	53.9	wsnp_Ex_c7447_12751589
155	1B	IWA540	53.9	wsnp_Ex_c10596_17293192
156	1B	IWA4681	53.9	wsnp_Ex_c7447_12752449
157	1B	IWA6134	54.2	wsnp_JD_c6331_7499499
158	1B	IWA6018	54.2	wsnp_JD_c35642_26554827
159	1B	IWA5070	54.2	wsnp_Ex_rep_c102633_87756283
160	1B	IWA4139	54.2	wsnp_Ex_c5245_9283053
161	1B	IWA3713	54.2	wsnp_Ex_c402_791233
162	1B	IWA6731	54.2	wsnp_Ku_c23096_32987510
163	1B	IWA946	54.9	wsnp_CAP12_c257_143515
164	1B	IWA4819	55.6	wsnp_Ex_c8625_14468525
165	1B	IWA2315	55.6	wsnp_Ex_c18462_27305612
166	1B	IWA1890	55.6	wsnp_Ex_c1440_2764867
167	1B	IWA1889	55.6	wsnp_Ex_c1440_2764269
168	1B	IWA606	55.6	wsnp_BM140362B_Ta_1_1
169	1B	IWA4999	55.6	wsnp_Ex_rep_c101231_86636951
170	1B	IWA3684	55.9	wsnp_Ex_c39616_46871127
171	1B	IWA5227	55.9	wsnp_Ex_rep_c66389_64588691
172	1B	IWA3076	56.2	wsnp_Ex_c26860_36084209
173	1B	IWA2717	56.2	wsnp_Ex_c22439_31632880
174	1B	IWA5962	56.2	wsnp_JD_c2636_3554874
175	1B	IWA4940	58.7	wsnp_Ex_c9577_15857679
176	1B	IWA4939	58.7	wsnp_Ex_c9577_15857465
177	1B	IWA4703	58.7	wsnp_Ex_c7585_12957020
178	1B	IWA4702	58.7	wsnp_Ex_c7585_12955306
179	1B	IWA2889	58.7	wsnp_Ex_c24318_33561600
180	1B	IWA7040	58.7	wsnp_Ku_c4175_7603236
181	1B	IWA7527	59	wsnp_Ku_rep_c89089_82009060
182	1B	IWA6479	59	wsnp_Ku_c13043_20902807
183	1B	IWA5160	59	wsnp_Ex_rep_c107911_91350930
184	1B	IWA5159	59	wsnp_Ex_rep_c107911_91350866
185	1B	IWA4091	59	wsnp_Ex_c5101_9053178
186	1B	IWA4090	59	wsnp_Ex_c5101_9052671
187	1B	IWA2790	59	wsnp_Ex_c23235_32471767
188	1B	IWA2788	59	wsnp_Ex_c23230_32466568
189	1B	IWA2041	59	wsnp_Ex_c15611_23929128
190	1B	IWA2040	59	wsnp_Ex_c15611_23928961
191	1B	IWA1729	59	wsnp_Ex_c13109_20725640
192	1B	IWA734	59	wsnp_CAP11_c287_244799
193	1B	IWA7811	59	wsnp_Ra_c2748_5223434
194	1B	IWA2586	59.9	wsnp_Ex_c21198_30326388
195	1B	IWA2588	59.9	wsnp_Ex_c21198_30327016
196	1B	IWA2890	60.4	wsnp_Ex_c24318_33562395
197	1B	IWA3189	62.1	wsnp_Ex_c28733_37836638
198	1B	IWA1859	63.8	wsnp_Ex_c44049_50205614
199	1B	IWA8313	64.6	wsnp_RFL_Contig2220_1597321
200	1B	IWA1164	65.6	wsnp_CAP8_c2023_1110474
201	1B	IWA579	66.3	wsnp_Ex_c11073_17956329
202	1B	IWA4155	70.8	wsnp_Ex_c5296_9365860
203	1B	IWA4154	70.8	wsnp_Ex_c5296_9365847
204	1B	IWA4153	70.8	wsnp_Ex_c5296_9365528
205	1B	IWA6646	70.8	wsnp_Ku_c18227_27490539
206	1B	Xwmc134	85.6
207	1B	Xgwm11	107.5
208	1B	Xgwm18	107.5
209	1D	IWA5731	0	wsnp_Ex_rep_c71376_70138381
210	1D	IWA3548	0	wsnp_Ex_c35886_43950102
211	1D	IWA3547	15.6	wsnp_Ex_c35886_43949442
212	1D	IWA3549	15.6	wsnp_Ex_c35886_43950574
213	1D	IWA3790	17.4	wsnp_Ex_c4162_7519423
214	1D	IWA3420	18.8	wsnp_Ex_c32956_41523146
215	1D	IWA474	18.8	wsnp_BF474139D_Ta_2_1
216	1D	IWA7848	19.9	wsnp_Ra_c31132_40304115
217	1D	IWA1412	37	wsnp_Ex_c10959_17801482
218	1D	IWA7154	37.7	wsnp_Ku_c53270_57959459
219	1D	Xwmc216	40.8
220	1D	Xwmc429	43.5
221	1D	Xcfd83	45.7
222	1D	IWA1464	48.8	wsnp_Ex_c1130_2166731
223	1D	IWA2164	49.1	wsnp_Ex_c16720_25268525
224	1D	IWA5163	49.1	wsnp_Ex_rep_c108057_91436561
225	1D	IWA165	50.7	wsnp_BE445121D_Ta_2_2
226	1D	IWA1192	51.9	wsnp_CAP8_c458_368125
227	1D	IWA1193	51.9	wsnp_CAP8_c458_368155
228	1D	IWA642	54.2	wsnp_Ex_c11913_19105189
229	1D	IWA980	55.1	wsnp_Ex_c17211_25859780
230	1D	IWA362	56.5	wsnp_CAP11_c992_593615
231	1D	IWA57	56.5	wsnp_BE443930B_Ta_2_1
232	1D	IWA5019	56.9	wsnp_Ex_rep_c101500_86856438
233	1D	IWA5018	56.9	wsnp_Ex_rep_c101500_86856089
234	1D	IWA5020	56.9	wsnp_Ex_rep_c101500_86856679
235	1D	Xcfd92	65
236	1D	IWA1544	67.7	wsnp_Ex_c11866_19039540
237	1D	IWA8551	70.3	wsnp_CAP11_c2307_1200406
238	1D	IWA713	80	wsnp_CAP11_c2307_1200406
239	1D	IWA4645	80	wsnp_Ex_c7252_12454704
240	1D	IWA4716	81.1	wsnp_Ex_c7705_13141187
241	1D	IWA7533	81.1	wsnp_Ra_c1020_2062200
242	1D	IWA2269	89.3	wsnp_Ex_c17884_26647952
243	1D	IWA2268	89.3	wsnp_Ex_c17884_26647833
244	1D	IWA1789	89.3	wsnp_Ex_c1358_2602235
245	1D	IWA1788	89.3	wsnp_Ex_c1358_2601510
246	1D	IWA1787	89.3	wsnp_Ex_c1358_2600929
247	1D	IWA407	89.3	wsnp_CAP12_c475_258416
248	1D	IWA6960	89.3	wsnp_Ku_c3682_6786230
249	1D	IWA1397	90.4	wsnp_Ex_c1085_2078944
250	1D	IWA3753	103.6	wsnp_Ex_c41048_47969948
251	1D	IWA3125	103.6	wsnp_Ex_c278_538285
252	1D	IWA5996	103.6	wsnp_JD_c3091_4079762
253	2A	Xgwm356	0
254	2A	IWA6798	9.6	wsnp_Ku_c26323_36285697
255	2A	IWA6797	9.6	wsnp_Ku_c26323_36285601
256	2A	IWA2602	11.7	wsnp_Ex_c2137_4014383
257	2A	IWA8036	11.7	wsnp_Ra_c6586_11477949
258	2A	IWA2601	11.7	wsnp_Ex_c2137_4014287
259	2A	IWA5271	14.4
260	2A	IWA756	19.6	wsnp_CAP11_c360_282889
261	2A	IWA3897	21.8	wsnp_Ex_c44487_50527786
262	2A	IWA2370	22.5	wsnp_Ex_c19003_27913936
263	2A	IWA5872	22.8	wsnp_JD_c16315_15513268
264	2A	IWA4336	23.1	wsnp_Ex_c5740_10081171
265	2A	IWA5959	28	wsnp_JD_c2578_3489735
266	2A	IWA2938	28	wsnp_Ex_c24964_34219020
267	2A	IWA6931	29.2	wsnp_Ku_c33884_43306422
268	2A	IWA1539	30.8	wsnp_Ex_c11827_18986376
269	2A	Xwmc181	36.8
270	2A	Xwmc644	60.8
271	2A	Xwmc819	62
272	2A	Xgwm275	65.1
273	2A	Xgwm95	65.1
274	2A	IWA534	70.2	wsnp_BG263521A_Ta_2_2
275	2A	IWA2758	70.2	wsnp_Ex_c22862_32074455
276	2A	IWA3943	70.2	wsnp_Ex_c45599_51347976
277	2A	IWA533	70.2	wsnp_BG263521A_Ta_2_1
278	2A	IWA7389	70.5	wsnp_Ku_rep_c102140_89178676
279	2A	IWA2259	70.8	wsnp_Ex_c1782_3365844
280	2A	IWA4410	70.8	wsnp_Ex_c60588_60977198
281	2A	IWA5037	70.8	wsnp_Ex_rep_c101866_87158671
282	2A	IWA5585	70.8	wsnp_Ex_rep_c69124_68035485
283	2A	IWA5586	70.8	wsnp_Ex_rep_c69124_68035904
284	2A	IWA6139	70.8	wsnp_JD_c6436_7600132
285	2A	IWA6369	70.8	wsnp_JG_c926_520103
286	2A	IWA6514	70.8	wsnp_Ku_c14099_22301373
287	2A	IWA7248	70.8	wsnp_Ku_c6826_11860405
288	2A	IWA7705	70.8	wsnp_Ra_c19526_28719561
289	2A	IWA1597	70.8	wsnp_Ex_c12219_19526749
290	2A	IWA7390	71.1	wsnp_Ku_rep_c102140_89178814
291	2A	IWA2262	72.5	wsnp_Ex_c17852_26612172
292	2A	IWA2907	74.3	wsnp_Ex_c24523_33770410
293	2A	IWA2948	74.3	wsnp_Ex_c25057_34318425
294	2A	IWA3992	74.6	wsnp_Ex_c47370_52604482
295	2A	IWA3151	77.5	wsnp_Ex_c28204_37349164
296	2A	IWA1174	78.2	wsnp_CAP8_c2677_1394934
297	2A	IWA488	78.2	wsnp_CAP8_rep_c3687_1819173
298	2A	IWA7947	79	wsnp_Ra_c4503_8155485
299	2A	IWA241	83.6	wsnp_BE490763A_Ta_1_3
300	2A	IWA240	83.6	wsnp_BE490763A_Ta_1_2
301	2A	IWA6089	86.2	wsnp_JD_c514_781859
302	2A	IWA3718	86.2	wsnp_Ex_c40280_47375312
303	2A	IWA4396	86.5	wsnp_Ex_c5984_10493714
304	2A	IWA5409	86.5	wsnp_Ex_rep_c67530_66144244
305	2A	IWA5449	86.5	wsnp_Ex_rep_c67751_66428606
306	2A	IWA5574	86.5	wsnp_Ex_rep_c69014_67914888
307	2A	IWA5640	86.5	wsnp_Ex_rep_c69799_68761171
308	2A	IWA6090	86.5	wsnp_JD_c514_782019
309	2A	IWA6270	86.5	wsnp_JD_rep_c50243_34277175
310	2A	IWA7547	86.5	wsnp_Ra_c107797_91270622
311	2A	IWA3199	86.5	wsnp_Ex_c28942_38018762
312	2A	IWA2612	90.2	wsnp_Ex_c21409_30544027
313	2A	IWA4733	93.8	wsnp_Ex_c7829_13320760
314	2A	IWA1275	95	wsnp_Ex_c10084_16572374
315	2A	IWA2092	95	wsnp_Ex_c16079_24507688
316	2A	IWA542	95	wsnp_Ex_c106_217340
317	2A	IWA4732	95.7	wsnp_Ex_c7829_13320738
318	2A	IWA4562	95.7	wsnp_Ex_c6660_11526924
319	2A	IWA7339	96.1	wsnp_Ku_c8927_15048149
320	2A	IWA5855	99.7	wsnp_JD_c15127_14676522
321	2A	IWA5878	100.8	wsnp_JD_c169_270144
322	2A	IWA6845	100.8	wsnp_Ku_c28467_38394907
323	2A	IWA5463	100.8	wsnp_Ex_rep_c67848_66550974
324	2A	IWA7593	101.4	wsnp_Ra_c12874_20497763
325	2A	IWA7148	102.6	wsnp_Ku_c52392_57380485
326	2A	IWA5462	102.9	wsnp_Ex_rep_c67848_66550913
327	2A	IWA7433	102.9	wsnp_Ku_rep_c68130_66991591
328	2A	IWA5215	102.9	wsnp_Ex_rep_c66358_64543218
329	2A	IWA3988	103.6	wsnp_Ex_c47157_52450090
330	2A	IWA2884	104.3	wsnp_Ex_c2426_4542393
331	2A	IWA5214	104.3	wsnp_Ex_rep_c66358_64543089
332	2A	IWA5216	104.3	wsnp_Ex_rep_c66358_64543401
333	2A	IWA6499	104.3	wsnp_Ku_c136_271700
334	2A	IWA6503	104.3	wsnp_Ku_c13700_21770090
335	2A	IWA7166	104.3	wsnp_Ku_c54793_58953037
336	2A	IWA7540	104.3	wsnp_Ra_c10658_17500498
337	2A	IWA2835	104.3	wsnp_Ex_c23768_33006588
338	2A	IWA6844	105	wsnp_Ku_c28467_38394887
339	2A	IWA3629	106.4	wsnp_Ex_c3808_6925015
340	2A	IWA3628	106.4	wsnp_Ex_c3808_6924802
341	2A	IWA6592	106.7	wsnp_Ku_c16358_25225060
342	2A	Xgwm294	111.7
343	2A	Xgwm558	0
344	2A	Xbarc15	3
345	2A	Xwmc177	37.6
346	2A	IWA6922	46.6	wsnp_Ku_c33374_42877546
347	2A	IWA6745	46.6	wsnp_Ku_c23598_33524490
348	2A	IWA3382	46.6	wsnp_Ex_c322_624793
349	2A	IWA3047	46.6	wsnp_Ex_c26406_35653828
350	2A	IWA2428	46.6	wsnp_Ex_c19516_28483751
351	2A	IWA2427	46.6	wsnp_Ex_c19516_28483050
352	2A	IWA2425	46.6	wsnp_Ex_c19516_28481857
353	2A	IWA2424	46.6	wsnp_Ex_c19516_28480964
354	2A	IWA7736	46.6	wsnp_Ra_c21104_30458226
355	2A	IWA8472	46.9
356	2A	IWA8274	46.9	wsnp_RFL_Contig1951_1127302
357	2A	IWA5342	46.9	wsnp_Ex_rep_c66982_65424216
358	2A	IWA4989	46.9	wsnp_Ex_c997_1906900
359	2A	IWA4714	46.9	wsnp_Ex_c770_1514612
360	2A	IWA3686	46.9	wsnp_Ex_c3963_7179957
361	2A	IWA3143	46.9	wsnp_Ex_c28133_37275403
362	2A	IWA2426	46.9	wsnp_Ex_c19516_28482852
363	2A	IWA681	46.9	wsnp_Ex_c1246_2393249
364	2A	IWA3556	47.3	wsnp_Ex_c36049_44083089
365	2A	IWA6481	47.3	wsnp_Ku_c13068_20937906
366	2A	IWA4192	0	wsnp_Ex_c53729_56868062
367	2A	IWA2778	0	wsnp_Ex_c2311_4327681
368	2A	IWA4463	0	wsnp_Ex_c62466_62094459
369	2A	IWA7327	1.1	wsnp_Ku_c850_1758318
370	2A	IWA6963	1.1	wsnp_Ku_c3688_6797159
371	2A	IWA5879	1.1	wsnp_JD_c16948_15934352
372	2A	IWA4664	1.1	wsnp_Ex_c7366_12630537
373	2A	IWA4461	1.1	wsnp_Ex_c62466_62094300
374	2A	IWA3687	1.1	wsnp_Ex_c3964_7181070
375	2A	IWA8325	1.1	wsnp_RFL_Contig2324_1803878
376	2A	IWA5364	2.5	wsnp_Ex_rep_c67149_65635258
377	2A	IWA5978	2.8	wsnp_JD_c289_450995
378	2A	IWA5894	2.8	wsnp_JD_c1872_2603061
379	2A	IWA551	2.8	wsnp_BG313362A_Ta_2_1
380	2A	IWA6813	3.8	wsnp_Ku_c2713_5145312
381	2A	IWA4947	4.2	wsnp_Ex_c9619_15913632
382	2A	IWA552	4.2	wsnp_BG313362D_Ta_2_1
383	2A	IWA8451	4.2	wsnp_RFL_Contig3286_3338919
384	2A	IWA4666	4.6	wsnp_Ex_c7366_12631101
385	2A	IWA6851	4.6	wsnp_Ku_c28820_38731047
386	2A	Xgwm311	11.5
387	2B	IWA6546	0	wsnp_Ku_c15057_23553016
388	2B	IWA6286	10.7	wsnp_JD_rep_c61500_39461849
389	2B	IWA7583	10.7	wsnp_Ra_c12275_19707323
390	2B	IWA7149	10.7	wsnp_Ku_c52392_57380726
391	2B	IWA5733	10.7	wsnp_Ex_rep_c71983_70544041
392	2B	IWA5675	23.7
393	2B	IWA5810	35.5	wsnp_JD_c12346_12607102
394	2B	IWA6778	35.5	wsnp_Ku_c2561_4878036
395	2B	IWA5809	35.5	wsnp_JD_c12346_12606967
396	2B	IWA1822	36.9	wsnp_Ex_c13865_21720466
397	2B	IWA2052	36.9	wsnp_Ex_c15681_24015996
398	2B	IWA3010	36.9	wsnp_JD_c16067_15341994
399	2B	IWA5460	36.9	wsnp_Ex_rep_c67838_66536117
400	2B	IWA8449	36.9	wsnp_RFL_Contig3273_3319580
401	2B	IWA8555	36.9	wsnp_RFL_Contig4076_4580964
402	2B	IWA1599	36.9	wsnp_Ex_c12223_19533198
403	2B	IWA3938	37.6	wsnp_Ex_c45468_51254978
404	2B	IWA3937	37.6	wsnp_Ex_c45468_51254832
405	2B	IWA5024	38.4	wsnp_Ex_rep_c101581_86924089
406	2B	IWA7955	38.4	wsnp_Ra_c4660_8405634
407	2B	IWA3233	38.4	wsnp_Ex_c29387_38429452
408	2B	Xwmc332	39.3
409	2B	IWA1292	44.2	wsnp_Ex_c1016_1943573
410	2B	IWA1293	44.2	wsnp_Ex_c1016_1943827
411	2B	IWA5051	44.2	wsnp_Ex_rep_c102127_87360034
412	2B	IWA1291	44.2	wsnp_Ex_c1016_1943126
413	2B	Xwmc41	47.5
414	2B	IWA7620	48.4	wsnp_Ra_c13963_21949302
415	2B	IWA6121	48.4	wsnp_JD_c6010_7167084
416	2B	IWA8362	49.8	wsnp_RFL_Contig2612_2274356
417	2B	IWA6122	49.8	wsnp_JD_c6010_7167159
418	2B	IWA2514	51.2	wsnp_Ex_c20182_29230528
419	2B	IWA4294	51.2	wsnp_Ex_c5619_9884202
420	2B	IWA7615	51.2	wsnp_Ra_c13679_21569624
421	2B	IWA1708	51.2	wsnp_Ex_c12922_20473104
422	2B	IWA6050	51.6	wsnp_JD_c4343_5462565
423	2B	IWA8195	51.6	wsnp_Ra_rep_c74497_72390803
424	2B	IWA3741	51.6	wsnp_Ex_c40976_47910144
425	2B	IWA3742	52.9	wsnp_Ex_c40976_47910672
426	2B	IWA1707	53.3	wsnp_Ex_c12922_20472434
427	2B	IWA6054	53.3	wsnp_JD_c43812_30492711
428	2B	IWA840	53.3	wsnp_Ex_c14711_22789762
429	2B	Xgwm47	54.9
430	2B	IWA544	58.1	wsnp_Ex_c10630_17338753
431	2B	IWA4356	58.1	wsnp_Ex_c58274_59638635
432	2B	IWA4357	58.1	wsnp_Ex_c58274_59638884
433	2B	IWA4890	58.1	wsnp_Ex_c922_1775246
434	2B	IWA4948	58.1	wsnp_Ex_c9628_15927045
435	2B	IWA5064	58.1	wsnp_Ex_rep_c102385_87568304
436	2B	IWA7850	58.1	wsnp_Ra_c31353_40494768
437	2B	IWA543	58.1	wsnp_BG274584B_Ta_2_1
438	2B	IWA3935	58.4	wsnp_Ex_c4542_8154800
439	2B	IWA4358	58.4	wsnp_Ex_c58274_59639258
440	2B	IWA1389	58.4	wsnp_Ex_c10796_17575074
441	2B	IWA6399	58.8	wsnp_Ku_c10564_17435459
442	2B	Xgwm120	64.5
443	2B	Xwmc441	66.5
444	2B	IWA2294	69.8	wsnp_Ex_c18261_27078080
445	2B	IWA226	69.8	wsnp_BE490267A_Ta_2_1
446	2B	IWA6317	70.1	wsnp_JD_rep_c67103_42432235
447	2B	IWA1489	70.1	wsnp_Ex_c114_230248
448	2B	IWA2253	72.8	wsnp_Ex_c17700_26446810
449	2B	IWA6781	83.1	wsnp_Ku_c2562_4879681
450	2B	IWA3213	83.1	wsnp_Ex_c29108_38173309
451	2B	IWA3622	83.5	wsnp_Ex_c3769_6861195
452	2B	IWA4983	83.5	wsnp_Ex_c9935_16358436
453	2B	IWA6875	83.5	wsnp_Ku_c3042_5706318
454	2B	IWA6818	83.5	wsnp_Ku_c2725_5163091
455	2B	IWA2885	83.5	wsnp_Ex_c24273_33514325
456	2B	IWA7951	84.2	wsnp_Ra_c46023_52004149
457	2B	IWA6819	84.9	wsnp_Ku_c2725_5163093
458	2B	IWA4984	86.2	wsnp_Ex_c9935_16358536
459	2B	IWA5149	86.2	wsnp_Ex_rep_c106085_90293854
460	2B	IWA6664	86.2	wsnp_Ku_c18923_28319203
461	2B	IWA2977	86.2	wsnp_Ex_c2557_4761174
462	2B	IWA3428	87	wsnp_Ex_c33246_41764093
463	2B	IWA4102	87	wsnp_Ex_c51661_55531646
464	2B	IWA5038	87	wsnp_Ex_rep_c101906_87187119
465	2B	IWA6136	87	wsnp_JD_c6350_7517130
466	2B	IWA6462	87	wsnp_Ku_c12517_20191465
467	2B	IWA6830	87	wsnp_Ku_c27759_37702654
468	2B	IWA7263	87	wsnp_Ku_c7096_12264232
469	2B	IWA1087	87	wsnp_BE442776A_Ta_2_1
470	2B	IWA3621	87.7	wsnp_Ex_c3764_6853627
471	2B	IWA5811	87.7	wsnp_JD_c1236_1789566
472	2B	IWA1912	87.7	wsnp_Ex_c1459_2797709
473	2B	IWA6135	88	wsnp_JD_c6436_7600132
474	2B	IWA6075	89.2	wsnp_JD_c4699_5834958
475	2B	IWA5464	89.2	wsnp_Ex_rep_c67865_66570323
476	2B	Xwmc474	92.1
477	2B	Xgwm374	92.1
478	2B	IWA4915	95	wsnp_Ex_c944_1810245
479	2B	IWA6547	95.4	wsnp_Ku_c15057_23554067
480	2B	IWA2673	96.2	wsnp_Ex_c22018_31192778
481	2B	IWA6308	96.2	wsnp_JD_rep_c64505_41132927
482	2B	IWA50	96.2	wsnp_BE404601B_Ta_2_1
483	2B	IWA4472	97.5	wsnp_Ex_c62844_62315607
484	2B	IWA5830	97.5	wsnp_JD_c13359_13373795
485	2B	IWA6554	97.5	wsnp_Ku_c15336_23908130
486	2B	IWA2674	97.5	wsnp_Ex_c22018_31193171
487	2B	IWA3277	98.3	wsnp_Ex_c3044_5620102
488	2B	IWA4894	100.3	wsnp_Ex_c9248_15372536
489	2B	IWA3924	100.3	wsnp_Ex_c45094_50985067
490	2B	IWA10	101	wsnp_BE399688B_Ta_2_1
491	2B	IWA2671	103.5	wsnp_Ex_c22010_31185837
492	2B	IWA3278	103.5	wsnp_Ex_c30447_39360584
493	2B	IWA5377	103.5	wsnp_Ex_rep_c67257_65786614
494	2B	IWA6427	103.5	wsnp_Ku_c11665_18999583
495	2B	IWA328	103.5	wsnp_CAP11_c3599_1741800
496	2B	IWA6364	108.4	wsnp_JG_c609_370792
497	2B	IWA6740	114.1	wsnp_Ku_c23305_33210841
498	2B	IWA4421	115.2	wsnp_Ex_c6099_10674508
499	2B	IWA4554	115.2	wsnp_Ex_c66052_64232430
500	2B	IWA4652	115.2	wsnp_Ex_c7285_12506938
501	2B	IWA6739	115.2	wsnp_Ku_c23305_33210628
502	2B	IWA7069	115.2	wsnp_Ku_c44441_51721669
503	2B	IWA8083	115.2	wsnp_Ra_c8489_14382125
504	2B	IWA4420	115.2	wsnp_Ex_c6099_10674406
505	2B	IWA4216	120	wsnp_Ex_c5412_9565527
506	2B	IWA2115	127.6	wsnp_Ex_c163_320267
507	2B	IWA2116	127.6	wsnp_Ex_c163_320858
508	2B	IWA2117	127.6	wsnp_Ex_c163_321026
509	2B	IWA7800	127.6	wsnp_Ra_c26744_36299151
510	2B	IWA1929	127.6	wsnp_Ex_c14711_22788263
511	2B	IWA4285	128.3	wsnp_Ex_c56027_58308093
512	2B	IWA5410	128.3	wsnp_Ex_rep_c67542_66164609
513	2B	IWA4284	128.3	wsnp_Ex_c56027_58306755
514	2B	IWA2391	130.1	wsnp_Ex_c19309_28242774
515	2B	IWA1359	130.1	wsnp_Ex_c10596_17293192
516	2B	IWA6474	131.6	wsnp_Ku_c12721_20478606
517	2B	IWA7916	132.7	wsnp_Ra_c407_862316
518	2B	IWA1360	133.3	wsnp_Ex_c10596_17293363
519	2B	IWA6184	135	wsnp_JD_c8085_9129899
520	2B	IWA3838	135.8	wsnp_Ex_c4272_7708423
521	2B	IWA1930	135.8	wsnp_Ex_c14711_22788586
522	2B	IWA6767	154.8	wsnp_Ku_c2486_4751695
523	2B	IWA8430	155.2	wsnp_RFL_Contig3118_3061389
524	2B	IWA6768	155.2	wsnp_Ku_c2486_4751761
525	2B	IWA5137	158.1	wsnp_Ex_rep_c105401_89840110
526	2B	IWA2407	158.1	wsnp_Ex_c19371_28311667
527	2B	IWA7936	158.8	wsnp_Ra_c4321_7860456
528	2B	IWA2846	158.8	wsnp_Ex_c2388_4476302
529	2B	IWA5385	161.5	wsnp_Ex_rep_c67320_65870601
530	2B	IWA1799	162.7	wsnp_Ex_c13686_21480826
531	2B	IWA5772	163.1	wsnp_JD_c10389_11059599
532	2B	IWA3605	163.1	wsnp_Ex_c3740_6815132
533	2B	IWA7370	166.5	wsnp_Ku_c9883_16462146
534	2B	IWA1535	0	wsnp_Ex_c11758_18896434
535	2B	IWA6656	0	wsnp_Ku_c18587_27915541
536	2B	Xwmc361	4.3
537	2B	IWA746	7.3	wsnp_Ex_c13352_21044607
538	2B	IWA5442	10	wsnp_Ex_rep_c67697_66363222
539	2B	IWA5990	15.2	wsnp_JD_c30_49149
540	2B	IWA5989	15.2	wsnp_JD_c30_49073
541	2B	IWA5991	15.2	wsnp_JD_c30_49876
542	2B	IWA7122	15.2	wsnp_Ku_c498_1036380
543	2B	IWA5694	15.5	wsnp_Ex_rep_c70525_69448648
544	2B	IWA6852	15.5	wsnp_Ku_c28820_38731137
545	2B	IWA4963	16.2	wsnp_Ex_c979_1874338
546	2B	IWA2779	31.5	wsnp_Ex_c2311_4328167
547	2B	IWA4665	31.5	wsnp_Ex_c7366_12631059
548	2D	Xwmc144	0
549	2D	IWA2722	7.8	wsnp_Ex_c2251_4218338
550	2D	IWA2961	10.3	wsnp_Ex_c25311_34578436
551	2D	IWA8562	10.7	wsnp_RFL_Contig4134_4692458
552	2D	IWA5637	11.1	wsnp_Ex_rep_c69782_68740893
553	2D	IWA7332	21.8	wsnp_Ku_c8712_14751858
554	2D	IWA4789	22.2	wsnp_Ex_c8303_14001708
555	2D	IWA6302	64	wsnp_JD_rep_c63957_40798121
556	2D	IWA1939	64	wsnp_Ex_c14779_22892053
557	2D	Xgwm261	66.7
558	2D	Xgwm296	68.5
559	2D	IWA965	72.3	wsnp_Ex_c16836_25401702
560	2D	IWA1107	72.3	wsnp_CAP7_c888_455397
561	2D	IWA4746	73.4	wsnp_Ex_c7908_13430703
562	2D	IWA4354	73.4	wsnp_Ex_c58019_59494143
563	2D	Xcfd51	79.1
564	2D	IWA7762	0	wsnp_Ra_c22648_32132929
565	2D	IWA5674	0	wsnp_Ex_rep_c70132_69082297
566	2D	IWA96	0.1	wsnp_BE426620D_Ta_2_2
567	2D	IWA5673	0.2	wsnp_Ex_rep_c70132_69082249
568	2D	IWA2053	0.3	wsnp_Ex_c15681_24016359
569	2D	IWA1821	0.4	wsnp_Ex_c13865_21720307
570	2D	IWA8293	0.5	wsnp_RFL_Contig2104_1368653
571	2D	IWA2631	0.5	wsnp_Ex_c21593_30744815
572	2D	IWA2792	0.5	wsnp_Ex_c23239_32477458
573	2D	IWA553	0.8	wsnp_Ex_c10667_17387885
574	2D	IWA7348	0.8	wsnp_Ku_c9269_15583444
575	2D	IWA8365	1.5	wsnp_RFL_Contig2659_2346243
576	3A	IWA926	0	wsnp_Ex_c16002_24419222
577	3A	IWA799	0	wsnp_Ex_c14182_22122844
578	3A	IWA524	0	wsnp_Ex_c10251_16815792
579	3A	IWA523	0	wsnp_Ex_c10251_16815792
580	3A	IWA2029	0	wsnp_Ex_c15475_23757972
581	3A	IWA5982	3.3	wsnp_JD_c29019_23208279
582	3A	IWA5981	3.3	wsnp_JD_c29019_23208158
583	3A	IWA5980	3.3	wsnp_JD_c29019_23208078
584	3A	IWA5213	3.3	wsnp_Ex_rep_c66357_64540428
585	3A	IWA5212	3.3	wsnp_Ex_rep_c66357_64540369
586	3A	IWA2362	3.3	wsnp_Ex_c1894_3575749
587	3A	IWA616	3.3	wsnp_BQ160970A_Ta_2_7
588	3A	IWA7602	3.3	wsnp_Ra_c132_291198
589	3A	IWA4296	14.1	wsnp_Ex_c5623_9891427
590	3A	IWA4298	14.1	wsnp_Ex_c5623_9891584
591	3A	IWA8162	22.3	wsnp_Ra_rep_c69692_67234463
592	3A	IWA8374	23.8	wsnp_RFL_Contig2699_2402527
593	3A	IWA1831	28.3	wsnp_Ex_c13949_21828493
594	3A	IWA5285	30.5	wsnp_Ex_rep_c66685_65003254
595	3A	IWA7441	31.2	wsnp_Ku_rep_c68484_67500021
596	3A	IWA4110	31.2	wsnp_Ex_c51776_55603135
597	3A	IWA4025	31.2	wsnp_Ex_c48455_53355009
598	3A	IWA4001	31.2	wsnp_Ex_c47907_52974924
599	3A	IWA3250	31.2	wsnp_Ex_c29742_38738725
600	3A	IWA2332	31.2	wsnp_Ex_c18637_27508578
601	3A	IWA236	31.2	wsnp_BE490651A_Ta_2_2
602	3A	IWA2987	31.9	wsnp_Ex_c25668_34932560
603	3A	IWA8468	31.9	wsnp_RFL_Contig3404_3532568
604	3A	IWA7350	34	wsnp_Ku_c9316_15647115
605	3A	IWA4930	34	wsnp_Ex_c9510_15761235
606	3A	IWA1984	34	wsnp_Ex_c15100_23284662
607	3A	IWA1983	34	wsnp_Ex_c15100_23284292
608	3A	IWA7440	34	wsnp_Ku_rep_c68484_67499824
609	3A	IWA5849	34.7	wsnp_JD_c14691_14352459
610	3A	IWA2944	34.7	wsnp_Ex_c2502_4675968
611	3A	IWA8558	34.7	wsnp_RFL_Contig4082_4591766
612	3A	IWA5332	35.7	wsnp_Ex_rep_c66907_65324299
613	3A	IWA5124	35.7	wsnp_Ex_rep_c104884_89459472
614	3A	IWA3836	35.7	wsnp_Ex_c42698_49211728
615	3A	IWA248	35.7	wsnp_BE494474A_Ta_2_1
616	3A	IWA6170	35.7	wsnp_JD_c7441_8535047
617	3A	IWA5316	36.7	wsnp_Ex_rep_c66867_65267909
618	3A	IWA2316	36.7	wsnp_Ex_c1848_3482919
619	3A	IWA6187	36.7	wsnp_JD_c8207_9234643
620	3A	IWA2617	39.1	wsnp_Ex_c2148_4035900
621	3A	IWA7114	39.6	wsnp_Ku_c4886_8753646
622	3A	IWA6783	39.6	wsnp_Ku_c25809_35776454
623	3A	IWA1887	39.6	wsnp_Ex_c14340_22315611
624	3A	IWA8580	39.6	wsnp_RFL_Contig429_4978628
625	3A	IWA8215	42.5	wsnp_Ra_rep_c99053_85689574
626	3A	IWA1308	45.6	wsnp_Ex_c10272_16842803
627	3A	IWA4138	46.6	wsnp_Ex_c52423_56025523
628	3A	IWA7245	48.2	wsnp_Ku_c6772_11776285
629	3A	IWA6877	48.2	wsnp_Ku_c3097_5801027
630	3A	IWA5616	48.2	wsnp_Ex_rep_c69567_68516173
631	3A	IWA5387	48.2	wsnp_Ex_rep_c67349_65914945
632	3A	IWA2095	48.2	wsnp_Ex_c16079_24507688
633	3A	IWA2069	48.2	wsnp_Ex_c15848_24235835
634	3A	IWA1426	48.2	wsnp_Ex_c11048_17916681
635	3A	IWA7928	48.2	wsnp_Ra_c42478_49433787
636	3A	IWA6229	48.5	wsnp_JD_c9434_10274598
637	3A	IWA720	48.5	wsnp_CAP11_c2438_1258747
638	3A	IWA6306	48.5	wsnp_JD_rep_c64325_41024646
639	3A	IWA1490	51	wsnp_Ex_c1141_2191485
640	3A	IWA7022	51.7	wsnp_Ku_c40218_48484410
641	3A	IWA2898	51.7	wsnp_Ex_c24432_33676448
642	3A	IWA7649	51.7	wsnp_Ra_c16278_24893033
643	3A	IWA5067	52	wsnp_Ex_rep_c102478_87635370
644	3A	IWA4675	52.3	wsnp_Ex_c742_1458033
645	3A	IWA6413	52.3	wsnp_Ku_c11052_18135847
646	3A	IWA4333	52.6	wsnp_Ex_c57322_59083238
647	3A	IWA7552	52.6	wsnp_Ra_c10911_17834481
648	3A	IWA4335	53.5	wsnp_Ex_c57322_59084950
649	3A	IWA4676	54	wsnp_Ex_c742_1458743
650	3A	Xwmc388	60.9
651	3A	IWA5191	0	wsnp_Ex_rep_c66274_64426901
652	3A	IWA5190	0.4	wsnp_Ex_rep_c66274_64426834
653	3A	IWA7999	1.7	wsnp_Ra_c5454_9660102
654	3A	IWA6716	1.7	wsnp_Ku_c217_430915
655	3A	IWA2397	1.7	wsnp_Ex_c19309_28243712
656	3A	IWA2396	1.7	wsnp_Ex_c19309_28242774
657	3A	IWA8000	1.7	wsnp_Ra_c5454_9660204
658	3A	IWA3031	3.1	wsnp_Ex_c26213_35462685
659	3A	IWA8038	5.3	wsnp_Ra_c66411_64796843
660	3A	IWA7157	6.4	wsnp_Ku_c5359_9530161
661	3A	IWA3177	6.4	wsnp_Ex_c28679_37784735
662	3A	IWA602	6.4	wsnp_BM137927A_Ta_2_1
663	3A	IWA4850	7.8	wsnp_Ex_c88767_80001420
664	3A	IWA3178	7.8	wsnp_Ex_c28679_37784954
665	3A	IWA1457	7.8	wsnp_Ex_c11229_18163892
666	3A	IWA7158	7.8	wsnp_Ku_c5359_9531713
667	3A	IWA891	19.1	wsnp_CAP11_rep_c8581_3702222
668	3A	IWA1367	23.4	wsnp_Ex_c10630_17338753
669	3A	IWA1366	23.4	wsnp_Ex_c10630_17338703
670	3A	IWA7812	23.4	wsnp_Ra_c27517_37034553
671	3A	IWA7938	24.1	wsnp_Ra_c4373_7946257
672	3A	Xwmc169	28.7
673	3A	Xwmc532	62.8
674	3A	Xgwm369	66.7
675	3A	IWA4781	72.3	wsnp_Ex_c8240_13914674
676	3A	IWA4257	72.3	wsnp_Ex_c55051_57706127
677	3A	IWA5050	72.3	wsnp_Ex_rep_c102110_87348288
678	3A	IWA4804	73	wsnp_Ex_c8409_14170476
679	3A	IWA8105	74.8	wsnp_Ra_c9738_16173810
680	3A	IWA3939	74.8	wsnp_Ex_c4548_8166555
681	3A	IWA8106	74.8	wsnp_Ra_c9738_16174002
682	3A	IWA851	80.1	wsnp_Ex_c1482_2835474
683	3A	IWA8127	80.8	wsnp_Ra_rep_c106523_90273922
684	3A	IWA2993	83.7	wsnp_Ex_c2573_4788116
685	3A	IWA8062	84.9	wsnp_Ra_c741_1529103
686	3A	IWA7861	84.9	wsnp_Ra_c32168_41215276
687	3A	IWA4066	84.9	wsnp_Ex_c50074_54480272
688	3A	IWA2738	84.9	wsnp_Ex_c22683_31887799
689	3A	IWA2737	84.9	wsnp_Ex_c22683_31887736
690	3A	IWA8280	84.9	wsnp_RFL_Contig1999_1190396
691	3A	IWA2822	86	wsnp_Ex_c23633_32868822
692	3A	IWA2174	86.4	wsnp_Ex_c16864_25440739
693	3A	IWA8100	86.4	wsnp_Ra_c9185_15386081
694	3A	IWA4581	87.2	wsnp_Ex_c6833_11782875
695	3A	IWA6977	88.2	wsnp_Ku_c3817_7009270
696	3A	IWA7771	89.2	wsnp_Ra_c2339_4506620
697	3A	IWA6528	89.2	wsnp_Ku_c14409_22721765
698	3A	IWA5429	89.2	wsnp_Ex_rep_c67635_66292308
699	3A	IWA3894	89.2	wsnp_Ex_c44375_50444756
700	3A	IWA1269	89.2	wsnp_Ex_c10014_16476905
701	3A	IWA447	89.2	wsnp_BF293133A_Ta_2_2
702	3A	IWA5430	89.9	wsnp_Ex_rep_c67635_66292689
703	3A	IWA4582	89.9	wsnp_Ex_c6833_11783076
704	3A	IWA5427	89.9	wsnp_Ex_rep_c67635_66291944
705	3A	IWA6976	89.9	wsnp_Ku_c3817_7009093
706	3A	IWA6092	91	wsnp_JD_c5170_6293946
707	3A	Xbarc321	94.5
708	3A	Xbarc12	125.5
709	3A	Xbarc57	126.7
710	3B	Xgwm566	0
711	3B	Xbarc73	5
712	3B	Xbarc133	37.9
713	3B	Xbarc75	41.6
714	3B	IWA6587	66.7	wsnp_Ku_c1629_3206989
715	3B	IWA7918	66.7	wsnp_Ra_c41135_48426638
716	3B	IWA3103	69.1	wsnp_Ex_c2723_5047696
717	3B	IWA5203	69.1	wsnp_Ex_rep_c66331_64503065
718	3B	IWA4654	70.7	wsnp_Ex_c7316_12552186
719	3B	IWA3724	71.8	wsnp_Ex_c40595_47620787
720	3B	IWA6651	71.8	wsnp_Ku_c18473_27773912
721	3B	IWA4801	72.5	wsnp_Ex_c8386_14128029
722	3B	IWA4800	72.5	wsnp_Ex_c8386_14127329
723	3B	IWA7230	72.5	wsnp_Ku_c6602_11531957
724	3B	IWA7647	83	wsnp_Ra_c16264_24873670
725	3B	IWA982	88.3	wsnp_Ex_c1725_3267186
726	3B	IWA280	113.4	wsnp_BE496983B_Ta_2_1
727	3B	IWA5618	114.7	wsnp_Ex_rep_c69595_68543549
728	3B	IWA4624	115.5	wsnp_Ex_c7108_12222660
729	3B	IWA4625	115.5	wsnp_Ex_c7108_12222850
730	3B	IWA663	115.5	wsnp_CAP11_c1214_700174
731	3B	IWA7794	115.5	wsnp_Ra_c26083_35644783
732	3B	IWA7342	116.3	wsnp_Ku_c9009_15185650
733	3B	Xwmc54	119
734	3B	Xwmc78	122.5
735	3B	IWA6464	126.6	wsnp_Ku_c12544_20235135
736	3B	IWA3426	129	wsnp_Ex_c33140_41677458
737	3B	IWA6632	129	wsnp_Ku_c17659_26797674
738	3B	IWA3425	129.5	wsnp_Ex_c33140_41677398
739	3B	Xwmc777	135.1
740	3B	Xwmc231	136
741	3B	IWA6238	138.8	wsnp_JD_c9805_10591233
742	3B	IWA6920	139.5	wsnp_Ku_c33335_42844680
743	3B	IWA3725	139.5	wsnp_Ex_c4063_7344449
744	3B	IWA3150	139.5	wsnp_Ex_c2820_5215394
745	3B	IWA3149	139.5	wsnp_Ex_c2820_5214711
746	3B	IWA7714	139.5	wsnp_Ra_c20041_29283768
747	3B	IWA6192	140.2	wsnp_JD_c828_1226159
748	3B	IWA3726	140.2	wsnp_Ex_c4063_7344641
749	3B	IWA6919	140.2	wsnp_Ku_c33335_42844594
750	3B	IWA747	140.5	wsnp_CAP11_c323_263628
751	3B	IWA748	140.5	wsnp_CAP11_c323_263800
752	3B	IWA1995	141.2	wsnp_Ex_c15264_23484775
753	3B	IWA3904	141.2	wsnp_Ex_c447_876091
754	3B	IWA3896	143.3	wsnp_Ex_c44447_50496676
755	3B	IWA6482	143.3	wsnp_Ku_c13069_20938717
756	3B	IWA2408	144.3	wsnp_Ex_c19372_28312715
757	3B	IWA4575	144.6	wsnp_Ex_c6805_11743678
758	3B	IWA3974	144.6	wsnp_Ex_c4661_8344663
759	3B	IWA2409	144.6	wsnp_Ex_c19372_28313727
760	3B	IWA1458	144.6	wsnp_Ex_c11246_18191079
761	3B	IWA4838	144.6	wsnp_Ex_c8695_14561512
762	3B	IWA7748	144.9	wsnp_Ra_c21559_30963208
763	3B	IWA5995	144.9	wsnp_JD_c30422_23944042
764	3B	IWA5960	144.9	wsnp_JD_c2623_3541255
765	3B	IWA4412	144.9	wsnp_Ex_c6065_10623213
766	3B	IWA4054	144.9	wsnp_Ex_c4927_8772847
767	3B	IWA3788	144.9	wsnp_Ex_c4156_7507247
768	3B	IWA2663	144.9	wsnp_Ex_c21930_31102685
769	3B	IWA2662	144.9	wsnp_Ex_c21930_31102213
770	3B	IWA2074	144.9	wsnp_Ex_c15944_24350833
771	3B	IWA1827	144.9	wsnp_Ex_c13906_21771680
772	3B	IWA1416	144.9	wsnp_Ex_c1097_2105209
773	3B	IWA1414	144.9	wsnp_Ex_c1097_2104088
774	3B	IWA316	144.9	wsnp_BE498786B_Ta_2_1
775	3B	IWA8457	144.9	wsnp_RFL_Contig3336_3426054
776	3B	IWA1417	145.2	wsnp_Ex_c1097_2105311
777	3B	IWA3787	145.5	wsnp_Ex_c4156_7506400
778	3B	IWA3117	145.5	wsnp_Ex_c2756_5105594
779	3B	IWA6761	145.5	wsnp_Ku_c24414_34372822
780	3B	IWA5396	146	wsnp_Ex_rep_c67404_65986980
781	3B	IWA186	146.5	wsnp_BE446087B_Ta_2_1
782	3B	IWA6185	147	wsnp_JD_c8158_9193784
783	3B	IWA6201	147	wsnp_JD_c8629_9593995
784	3B	IWA7285	147.7	wsnp_Ku_c7266_12549538
785	3B	IWA6200	147.7	wsnp_JD_c8629_9593896
786	3B	IWA5925	147.7	wsnp_JD_c2146_2955972
787	3B	IWA8326	147.7	wsnp_RFL_Contig2338_1839077
788	3B	IWA2990	151	wsnp_Ex_c257_491667
789	3B	IWA2492	151	wsnp_Ex_c19982_29009504
790	3B	IWA292	151	wsnp_BE497469B_Ta_2_1
791	3B	IWA5677	151	wsnp_Ex_rep_c70174_69125822
792	3B	IWA6381	151.7	wsnp_Ku_c10291_17065480
793	3B	IWA5933	151.7	wsnp_JD_c22179_19262979
794	3B	IWA5814	151.7	wsnp_JD_c1247_1802330
795	3B	IWA1206	151.7	wsnp_CAP8_c6899_3227098
796	3B	IWA629	151.7	wsnp_BQ168706B_Ta_2_2
797	3B	IWA628	151.7	wsnp_BQ168706B_Ta_2_1
798	3B	IWA183	151.7	wsnp_BE445508B_Ta_2_1
799	3B	IWA6698	151.7	wsnp_Ku_c210_413608
800	3B	IWA6380	152	wsnp_Ku_c10291_17065432
801	3B	Xgwm285	154.6
802	3B	Xwmc307	155.2
803	3B	IWA8480	157	wsnp_RFL_Contig3529_3696847
804	3B	IWA6814	158.3
805	3B	IWA7247	160	wsnp_Ku_c6825_11858665
806	3B	IWA6300	160	wsnp_JD_rep_c63942_40788045
807	3B	IWA4630	160	wsnp_Ex_c7172_12318529
808	3B	IWA4195	160	wsnp_Ex_c5378_9505533
809	3B	IWA4194	160	wsnp_Ex_c5378_9505087
810	3B	IWA3997	160	wsnp_Ex_c4769_8510104
811	3B	IWA2800	160	wsnp_Ex_c2330_4366134
812	3B	IWA2672	160	wsnp_Ex_c22016_31191407
813	3B	IWA1898	160	wsnp_Ex_c14462_22457559
814	3B	IWA1607	160	wsnp_Ex_c123_244117
815	3B	IWA4193	160	wsnp_Ex_c5378_9504586
816	3B	IWA7333	160	wsnp_Ku_c8722_14766699
817	3B	IWA6794	160.9	wsnp_Ku_c26257_36216976
818	3B	IWA6793	160.9	wsnp_Ku_c26257_36216869
819	3B	IWA4452	160.9	wsnp_Ex_c6223_10857649
820	3B	IWA3001	160.9	wsnp_JD_c14769_14413046
821	3B	IWA1449	160.9	wsnp_Ex_c1116_2138756
822	3B	IWA1383	160.9	wsnp_Ex_c10717_17456391
823	3B	IWA7595	160.9	wsnp_Ra_c12935_20587578
824	3B	IWA6213	161.4	wsnp_JD_c9042_9950637
825	3B	IWA2999	161.4	wsnp_JD_c14405_14144807
826	3B	IWA6677	161.4	wsnp_Ku_c19631_29148397
827	3B	IWA2329	161.9	wsnp_Ex_c18624_27492167
828	3B	IWA3504	161.9	wsnp_Ex_c34975_43204180
829	3B	IWA4236	162.8	wsnp_Ex_c5457_9632050
830	3B	IWA4235	162.8	wsnp_Ex_c5457_9631220
831	3B	IWA5613	162.8	wsnp_Ex_rep_c69489_68429726
832	3B	IWA1909	163.1	wsnp_Ex_c14551_22578987
833	3B	IWA2351	163.8	wsnp_Ex_c1878_3541204
834	3B	IWA5890	163.8	wsnp_JD_c1843_2562950
835	3B	Xwmc527	165.2
836	3B	IWA4613	168.1	wsnp_Ex_c7021_12096881
837	3B	IWA3245	168.1	wsnp_Ex_c29631_38640100
838	3B	IWA6720	168.1	wsnp_Ku_c21818_31604716
839	3B	IWA4863	169.2	wsnp_Ex_c9002_14999105
840	3B	IWA7035	169.2	wsnp_Ku_c4078_7436510
841	3B	IWA4507	171	wsnp_Ex_c6445_11200449
842	3B	IWA5178	171	wsnp_Ex_rep_c110375_92775402
843	3B	IWA7516	172.4	wsnp_Ku_rep_c72821_72480395
844	3B	IWA4721	172.4	wsnp_Ex_c7756_13218814
845	3B	IWA1704	172.4	wsnp_Ex_c12887_20427158
846	3B	IWA8520	172.4	wsnp_RFL_Contig383_4163148
847	3B	IWA5711	173.1	wsnp_Ex_rep_c70809_69690102
848	3B	IWA4653	173.1	wsnp_Ex_c7291_12517871
849	3B	IWA5775	173.1	wsnp_JD_c10602_11238420
850	3B	IWA3018	174.1	wsnp_JD_c169_270144
851	3B	IWA5805	174.8
852	3B	IWA6105	175.1	wsnp_JD_c5643_6802211
853	3B	IWA6104	175.1	wsnp_JD_c5643_6802088
854	3B	IWA7225	175.1	wsnp_Ku_c6430_11257008
855	3B	IWA1196	176	wsnp_CAP8_c4989_2410261
856	3B	IWA7388	176.9	wsnp_Ku_rep_c102135_89174746
857	3B	IWA4847	176.9	wsnp_Ex_c8825_14757625
858	3B	IWA4429	176.9	wsnp_Ex_c6129_10723211
859	3B	IWA1468	176.9	wsnp_Ex_c11313_18277396
860	3B	IWA1467	176.9	wsnp_Ex_c11313_18277285
861	3B	IWA7745	176.9	wsnp_Ra_c21364_30746475
862	3B	IWA1148	177.6	wsnp_CAP8_c1419_836050
863	3B	IWA4427	177.6	wsnp_Ex_c6129_10723019
864	3B	IWA6158	178.3	wsnp_JD_c6974_8084752
865	3B	IWA4428	178.3	wsnp_Ex_c6129_10723143
866	3B	IWA6223	178.3
867	3B	IWA3901	184.9	wsnp_Ex_c4457_8018164
868	3B	IWA2862	184.9	wsnp_Ex_c2400_4498931
869	3B	IWA624	184.9	wsnp_Ex_c11560_18632698
870	3B	IWA81	184.9	wsnp_BE445667B_Ta_1_1
871	3B	IWA7820	185.2	wsnp_Ra_c27984_37480491
872	3B	IWA7819	185.2	wsnp_Ra_c27984_37479613
873	3B	IWA6299	185.2	wsnp_JD_rep_c63810_40704815
874	3B	IWA5985	185.2	wsnp_JD_c29407_23413291
875	3B	IWA3455	185.2	wsnp_Ex_c3389_6223722
876	3B	IWA2951	185.2	wsnp_Ex_c25104_34368562
877	3B	IWA1095	185.2	wsnp_CAP7_c522_274783
878	3B	IWA8104	185.2	wsnp_Ra_c9693_16109264
879	3B	IWA8086	185.5	wsnp_Ra_c8570_14489763
880	3B	IWA7888	185.5	wsnp_Ra_c35520_44041887
881	3B	IWA7108	185.5	wsnp_Ku_c48167_54427241
882	3B	IWA6375	185.5	wsnp_Ku_c10196_16926860
883	3B	IWA3593	185.5	wsnp_Ex_c36937_44790003
884	3B	IWA3592	185.5	wsnp_Ex_c36937_44789309
885	3B	IWA2619	185.5	wsnp_Ex_c21491_30636749
886	3B	IWA2620	185.5	wsnp_Ex_c21491_30637789
887	3B	IWA7889	185.5	wsnp_Ra_c35520_44043347
888	3B	IWA7125	185.8	wsnp_Ku_c49975_55719349
889	3B	IWA2167	186.1	wsnp_Ex_c1676_3185400
890	3B	IWA7561	186.4	wsnp_Ra_c11243_18269800
891	3B	IWA3669	186.4	wsnp_Ex_c39124_46489956
892	3B	IWA3273	186.4	wsnp_Ex_c3040_5615597
893	3B	IWA1974	186.4	wsnp_Ex_c15047_23217632
894	3B	IWA1682	186.4	wsnp_Ex_c12781_20280445
895	3B	IWA1541	186.4	wsnp_Ex_c11837_18996495
896	3B	IWA125	186.4	wsnp_BE443288B_Ta_2_1
897	3B	IWA8594	186.4	wsnp_RFL_Contig4437_5225442
898	3B	IWA5432	187.1	wsnp_Ex_rep_c67645_66305241
899	3B	IWA4497	187.1	wsnp_Ex_c64005_62986957
900	3B	IWA1733	187.1	wsnp_Ex_c13154_20785032
901	3B	IWA1732	187.1	wsnp_Ex_c13154_20784674
902	3B	IWA1731	187.1	wsnp_Ex_c13154_20784321
903	3B	IWA6856	187.1	wsnp_Ku_c29102_39008953
904	3B	IWA5510	187.4	wsnp_Ex_rep_c68193_66971396
905	3B	IWA5511	187.4	wsnp_Ex_rep_c68193_66971472
906	3B	IWA6002	188.1	wsnp_JD_c3183_4178470
907	3B	IWA5324	188.8	wsnp_Ex_rep_c66893_65301351
908	3B	IWA5323	188.8	wsnp_Ex_rep_c66893_65301177
909	3B	IWA3170	188.8	wsnp_Ex_c2850_5263978
910	3B	IWA8576	188.8	wsnp_RFL_Contig4270_4938701
911	3B	IWA1548	189.1	wsnp_Ex_c11893_19077166
912	3B	IWA4498	189.1	wsnp_Ex_c64005_62987015
913	3B	IWA6542	190	wsnp_Ku_c14875_23320708
914	3B	IWA4906	190	wsnp_Ex_c9390_15586085
915	3B	IWA2063	190	wsnp_Ex_c15795_24169367
916	3B	IWA1684	190	wsnp_Ex_c12781_20280815
917	3B	IWA6900	190	wsnp_Ku_c31407_41142340
918	3B	IWA7391	190.5	wsnp_Ku_rep_c102162_89197212
919	3B	IWA5941	190.8	wsnp_JD_c22783_19631797
920	3B	IWA5646	190.8	wsnp_Ex_rep_c69845_68804456
921	3B	IWA3591	190.8	wsnp_Ex_c36937_44788679
922	3B	IWA8287	190.8	wsnp_RFL_Contig204_1272643
923	3B	IWA1576	191.1	wsnp_Ex_c1204_2313262
924	3B	Xbarc344	193.6
925	3B	IWA2360	197.9	wsnp_Ex_c18915_27811736
926	3B	IWA8053	200.8	wsnp_Ra_c69_149394
927	3B	IWA3332	200.8	wsnp_Ex_c3130_5790163
928	3B	IWA3331	200.8	wsnp_Ex_c3130_5789888
929	3B	IWA8054	200.8	wsnp_Ra_c69_149518
930	3B	IWA3330	202.3	wsnp_Ex_c3130_5789791
931	3B	Xwmc291	205.1
932	3B	Xgwm108	206.7
933	3B	IWA5015	209.2	wsnp_Ex_rep_c101457_86818160
934	3B	IWA5014	209.2	wsnp_Ex_rep_c101457_86818055
935	3B	IWA5013	209.2	wsnp_Ex_rep_c101457_86817938
936	3B	IWA5016	209.2	wsnp_Ex_rep_c101457_86818610
937	3B	IWA4778	209.9	wsnp_Ex_c8208_13870372
938	3B	IWA4324	209.9	wsnp_Ex_c57094_58953404
939	3B	IWA6056	209.9	wsnp_JD_c4413_5541190
940	3B	IWA4600	219.2	wsnp_Ex_c700_1379957
941	3B	IWA1745	225	wsnp_Ex_c13217_20858600
942	3B	IWA1744	226.1	wsnp_Ex_c13217_20858366
943	3B	Xcfa2170	228.9
944	3B	IWA8043	236	wsnp_Ra_c67016_65144188
945	3B	IWA1094	237.9	wsnp_CAP7_c5097_2266314
946	3B	Xwmc687	254.3
947	3B	Xwmc326	254.9
948	3B	IWA5594	260.7	wsnp_Ex_rep_c69287_68216012
949	3B	IWA8058	261.1	wsnp_Ra_c7158_12394405
950	3B	IWA6930	270.2	wsnp_Ku_c3371_6259457
951	3B	IWA4312	273.7	wsnp_Ex_c56591_58653455
952	3B	IWA4311	274.1	wsnp_Ex_c56591_58653386
953	3B	IWA2148	293.4	wsnp_Ex_c16569_25082817
954	3B	IWA1756	293.8	wsnp_Ex_c13284_20948460
955	3B	Xgwm181	298.9
956	3B	Xgwm247	298.9
957	3D	Xcfd9	0
958	3D	Xbarc323	3.9
959	3D	IWA525	45.9	wsnp_Ex_c10279_16851747
960	3D	Xgwm383	52.9
961	3D	Xwmc656	60.7
962	3D	Xgwm52	78.6
963	3D	Xbarc1162	80.5
964	3D	IWA7468	85.4	wsnp_Ku_rep_c69963_69469381
965	3D	IWA7672	90.5	wsnp_Ra_c17636_26538543
966	3D	IWA1082	94.8	wsnp_CAP7_c3519_1643682
967	3D	Xgdm72	99.3
968	3D	Xgwm341	102.1
969	3D	IWA8004	0	wsnp_Ra_c5532_9788185
970	3D	Xgwm161	8.6
971	3D	Xcfd55	9.2
972	4A	IWA1900	0	wsnp_Ex_c14478_22481430
973	4A	IWA3993	11.5	wsnp_Ex_c4752_8482625
974	4A	IWA7394	16.7	wsnp_Ku_rep_c102527_89481571
975	4A	IWA1137	19.4	wsnp_CAP8_c1013_646748
976	4A	IWA4232	24.6	wsnp_Ex_c54453_57331510
977	4A	IWA5363	26.2	wsnp_Ex_rep_c67145_65628860
978	4A	IWA4260	31.4	wsnp_Ex_c55245_57821389
979	4A	IWA6100	31.7	wsnp_JD_c5499_6647799
980	4A	IWA4252	31.7	wsnp_Ex_c5487_9686018
981	4A	IWA1728	31.7	wsnp_Ex_c13105_20721321
982	4A	IWA6394	31.7	wsnp_Ku_c10451_17281845
983	4A	IWA4479	32.7	wsnp_Ex_c6320_11003498
984	4A	IWA4261	32.7	wsnp_Ex_c55245_57821568
985	4A	IWA4251	32.7	wsnp_Ex_c5487_9685671
986	4A	IWA3902	32.7	wsnp_Ra_c19079_28210829
987	4A	IWA2108	32.7	wsnp_Ex_c16228_24682090
988	4A	IWA2066	32.7	wsnp_Ex_c15801_24178779
989	4A	IWA1992	32.7	wsnp_Ex_c1520_2906995
990	4A	IWA5831	32.7	wsnp_JD_c13364_13377722
991	4A	IWA7521	34.8	wsnp_Ku_rep_c76865_75281903
992	4A	IWA7537	34.8	wsnp_Ra_c10536_17322563
993	4A	IWA5457	37.7	wsnp_Ex_rep_c67799_66488792
994	4A	IWA7134	37.7	wsnp_Ku_c50991_56423610
995	4A	IWA7216	38	wsnp_Ku_c61953_63254478
996	4A	IWA7092	38	wsnp_Ku_c46057_52907637
997	4A	IWA6597	38	wsnp_Ku_c16481_25377573
998	4A	IWA5897	38	wsnp_JD_c19109_17348071
999	4A	IWA4406	38	wsnp_Ex_c6044_10590322
1000	4A	IWA4079	38	wsnp_Ex_c50586_54818545
1001	4A	IWA3845	38	wsnp_Ex_c4286_7734046
1002	4A	IWA3582	38	wsnp_Ex_c3666_6687919
1003	4A	IWA3542	38	wsnp_Ex_c35839_43909849
1004	4A	IWA3088	38	wsnp_Ex_c27088_36309449
1005	4A	IWA3028	38	wsnp_Ex_c2617_4864441
1006	4A	IWA1694	38	wsnp_Ex_c12818_20334933
1007	4A	IWA1693	38	wsnp_Ex_c12818_20334501
1008	4A	IWA1341	38	wsnp_Ex_c10527_17198865
1009	4A	IWA1320	38	wsnp_Ex_c10390_17007929
1010	4A	IWA1178	38	wsnp_CAP8_c296_283066
1011	4A	IWA826	38	wsnp_Ex_c14586_22625563
1012	4A	IWA112	38	wsnp_BE442869A_Ta_2_1
1013	4A	IWA7270	38	wsnp_Ku_c7197_12439299
1014	4A	IWA3604	38.7	wsnp_Ex_c37383_45143321
1015	4A	IWA3324	38.7	wsnp_Ex_c31173_39999624
1016	4A	IWA6103	38.7	wsnp_JD_c5620_6774675
1017	4A	Xcfa2256	39.8
1018	4A	IWA4876	40.9	wsnp_Ex_c9094_15139750
1019	4A	IWA3826	40.9	wsnp_Ex_c42406_48991013
1020	4A	IWA1639	40.9	wsnp_Ex_c12481_19890975
1021	4A	IWA1327	40.9	wsnp_Ex_c10463_17113256
1022	4A	IWA1071	40.9	wsnp_CAP7_c2731_1307600
1023	4A	IWA493	40.9	wsnp_BF482269A_Ta_2_1
1024	4A	IWA401	40.9	wsnp_BE637507A_Ta_2_1
1025	4A	IWA385	40.9	wsnp_BE591861A_Ta_2_5
1026	4A	IWA192	40.9	wsnp_BE446344A_Ta_2_1
1027	4A	IWA160	40.9	wsnp_BE444858A_Ta_2_1
1028	4A	IWA157	40.9	wsnp_BE444811A_Ta_2_1
1029	4A	IWA142	40.9	wsnp_BE443973A_Ta_2_1
1030	4A	IWA40	40.9	wsnp_BE403900A_Ta_2_1
1031	4A	IWA109	41.6	wsnp_CAP7_c4513_2055201
1032	4A	IWA110	41.6	wsnp_BE442776A_Ta_2_2
1033	4A	IWA115	41.6	wsnp_BE442961A_Ta_2_1
1034	4A	IWA172	41.6	wsnp_BE445427A_Ta_2_1
1035	4A	IWA296	41.6	wsnp_CAP11_c1432_806102
1036	4A	IWA1060	41.6	wsnp_CAP7_c2243_1090229
1037	4A	IWA1077	41.6	wsnp_CAP7_c32_19340
1038	4A	IWA1904	41.6	wsnp_Ex_c14529_22547438
1039	4A	IWA1919	41.6	wsnp_Ex_c14641_22698595
1040	4A	IWA2000	41.6	wsnp_Ex_c15282_23505878
1041	4A	IWA2292	41.6	wsnp_Ex_c18229_27041048
1042	4A	IWA2334	41.6	wsnp_Ex_c1865_3515470
1043	4A	IWA2781	41.6	wsnp_Ex_c23130_32358433
1044	4A	IWA3027	41.6	wsnp_Ex_c2617_4864218
1045	4A	IWA3029	41.6	wsnp_Ex_c2617_4864955
1046	4A	IWA3311	41.6	wsnp_Ex_c31006_39850673
1047	4A	IWA3326	41.6	wsnp_Ex_c31249_40066886
1048	4A	IWA3361	41.6	wsnp_Ex_c3178_5868813
1049	4A	IWA3541	41.6	wsnp_Ex_c35839_43909163
1050	4A	IWA3565	41.6	wsnp_Ex_c36141_44153175
1051	4A	IWA3581	41.6	wsnp_Ex_c3666_6687275
1052	4A	IWA4405	41.6	wsnp_Ex_c6044_10590220
1053	4A	IWA4513	41.6	wsnp_Ex_c64609_63343875
1054	4A	IWA4700	41.6	wsnp_Ex_c7550_12907422
1055	4A	IWA4772	41.6	wsnp_Ex_c8131_13754852
1056	4A	IWA5069	41.6	wsnp_Ex_rep_c102623_87746777
1057	4A	IWA5309	41.6	wsnp_Ex_rep_c66839_65233112
1058	4A	IWA5652	41.6	wsnp_Ex_rep_c69890_68851948
1059	4A	IWA5498	41.6	wsnp_Ex_rep_c68124_66892390
1060	4A	IWA5729	41.6	wsnp_Ex_rep_c71305_70087742
1061	4A	IWA5851	41.6	wsnp_JD_c14769_14413046
1062	4A	IWA5865	41.6	wsnp_JD_c15643_15039462
1063	4A	IWA6020	41.6	wsnp_JD_c36045_26751163
1064	4A	IWA6046	41.6	wsnp_JD_c4217_5322858
1065	4A	IWA6392	41.6	wsnp_Ku_c10434_17255840
1066	4A	IWA6531	41.6	wsnp_Ku_c14515_22860258
1067	4A	IWA6540	41.6	wsnp_Ku_c14803_23225628
1068	4A	IWA6873	41.6	wsnp_Ku_c30381_40208899
1069	4A	IWA8414	41.6	wsnp_RFL_Contig30_2884966
1070	4A	IWA8220	41.6	wsnp_RFL_Contig1073_101625
1071	4A	IWA7657	41.6	wsnp_Ra_c16634_25331368
1072	4A	IWA7617	41.6	wsnp_Ra_c13906_21872355
1073	4A	IWA7271	41.6	wsnp_Ku_c7197_12439730
1074	4A	IWA7133	41.6	wsnp_Ku_c50991_56423564
1075	4A	IWA6944	41.6	wsnp_Ku_c34883_44172415
1076	4A	IWA8459	41.6	wsnp_RFL_Contig3341_3436476
1077	4A	IWA7522	43	wsnp_Ku_rep_c77171_75478137
1078	4A	IWA5975	43	wsnp_JD_c27944_22630918
1079	4A	IWA4771	43	wsnp_Ex_c8131_13753986
1080	4A	IWA4560	43	wsnp_Ex_c6644_11508418
1081	4A	IWA4230	43	wsnp_Ex_c54395_57291841
1082	4A	IWA3792	43	wsnp_Ex_c4166_7525617
1083	4A	IWA3026	43	wsnp_Ex_c2617_4863745
1084	4A	IWA1824	43	wsnp_Ex_c1387_2659020
1085	4A	IWA7859	43	wsnp_Ra_c31915_40982091
1086	4A	IWA1329	44.1	wsnp_Ex_c10479_17138283
1087	4A	Xwmc420	45.9
1088	4A	IWA482	48.4	wsnp_CAP8_c458_368125
1089	4A	IWA2793	48.7	wsnp_Ex_c23248_32488191
1090	4A	IWA2794	48.7	wsnp_Ex_c23248_32488251
1091	4A	IWA7448	49.9	wsnp_Ku_rep_c68861_68030775
1092	4A	IWA5699	51.5	wsnp_Ex_rep_c70578_69495303
1093	4A	IWA4867	51.5	wsnp_Ex_c9035_15054913
1094	4A	IWA4698	51.5	wsnp_Ex_c7528_12868250
1095	4A	IWA3191	51.5	wsnp_Ex_c2884_5319215
1096	4A	IWA2900	51.5	wsnp_Ex_c24443_33687802
1097	4A	IWA2585	51.5	wsnp_Ex_c21197_30325539
1098	4A	IWA7699	51.5	wsnp_Ra_c19085_28218299
1099	4A	IWA4319	52.2	wsnp_Ex_c56880_58824784
1100	4A	IWA1400	52.2	wsnp_Ex_c10886_17694220
1101	4A	IWA7604	52.2	wsnp_Ra_c13301_21079434
1102	4A	IWA1727	53	wsnp_Ex_c13091_20706489
1103	4A	IWA1941	53	wsnp_Ex_c14793_22908184
1104	4A	IWA2902	57.1	wsnp_Ex_c24443_33688268
1105	4A	IWA2901	59.8	wsnp_Ex_c24443_33688235
1106	4A	IWA1792	60.6	wsnp_Ex_c13615_21393511
1107	4A	IWA402	60.6	wsnp_CAP12_c2297_1121142
1108	4A	IWA5123	60.6	wsnp_Ex_rep_c104859_89444355
1109	4A	IWA5544	60.9	wsnp_Ex_rep_c68569_67411985
1110	4A	IWA6501	60.9	wsnp_Ku_c13640_21686670
1111	4A	IWA5349	64	wsnp_Ex_rep_c67054_65517671
1112	4A	IWA2606	66	wsnp_Ex_c21383_30513824
1113	4A	IWA7077	67.7	wsnp_Ku_c45197_52288542
1114	4A	IWA6193	69.1	wsnp_JD_c8309_9321723
1115	4A	IWA7442	69.5	wsnp_Ku_rep_c68565_67614479
1116	4A	IWA4023	71.1	wsnp_Ex_c48449_53350799
1117	4A	IWA6885	72.7	wsnp_Ku_c3081_5778117
1118	4A	IWA6883	72.7	wsnp_Ku_c3081_5777013
1119	4A	IWA3981	72.7	wsnp_Ex_c469_928349
1120	4A	IWA2207	72.7	wsnp_Ex_c17338_26018247
1121	4A	IWA7535	72.7	wsnp_Ra_c1022_2067517
1122	4A	IWA6882	73.7	wsnp_Ku_c3081_5776947
1123	4A	IWA6884	73.7	wsnp_Ku_c3081_5777347
1124	4A	IWA8432	74.5	wsnp_RFL_Contig3138_3094305
1125	4A	IWA6454	75	wsnp_Ku_c1205_2398925
1126	4A	Xgwm397	77.5
1127	4A	IWA4199	79.4	wsnp_Ex_c539_1072859
1128	4A	IWA3728	80.3	wsnp_Ex_c4068_7351806
1129	4A	IWA2582	80.3	wsnp_Ex_c21165_30292808
1130	4A	IWA2581	80.3	wsnp_Ex_c21165_30292765
1131	4A	IWA5422	80.3	wsnp_Ex_rep_c67606_66250361
1132	4A	IWA5116	87.8	wsnp_Ex_rep_c104448_89161562
1133	4A	IWA1720	87.8	wsnp_Ex_c13031_20625900
1134	4A	IWA5200	87.8	wsnp_Ex_rep_c66324_64493429
1135	4A	Xwmc468	105.2
1136	4A	IWA4425	113.6	wsnp_Ex_c612_1213451
1137	4A	IWA6035	113.6	wsnp_JD_c38619_27992279
1138	4A	IWA8209	119.8	wsnp_Ra_rep_c87547_79842909
1139	4A	IWA6418	127.3	wsnp_Ku_c11227_18378980
1140	4A	IWA8168	127.3	wsnp_Ra_rep_c70233_67968353
1141	4A	Xbarc343	0
1142	4A	IWA6563	2.8	wsnp_Ku_c15531_24168235
1143	4A	IWA559	4.6	wsnp_BG313770B_Ta_1_3
1144	4A	IWA558	4.6	wsnp_BG313770B_Ta_1_1
1145	4A	IWA6690	21.8	wsnp_Ku_c20783_30448706
1146	4A	IWA2170	21.8	wsnp_Ex_c16814_25373602
1147	4A	IWA1067	21.8	wsnp_CAP7_c254_139077
1148	4A	IWA1066	21.8	wsnp_CAP7_c254_138937
1149	4A	IWA7197	28.4	wsnp_Ku_c5874_10384800
1150	4A	IWA4688	28.4	wsnp_Ex_c7489_12809914
1151	4A	IWA4132	28.4	wsnp_Ex_c5231_9256869
1152	4A	IWA4083	28.4	wsnp_Ex_c5072_9006666
1153	4A	IWA2756	28.4	wsnp_Ex_c22830_32035900
1154	4A	IWA2377	28.4	wsnp_Ex_c19094_28015035
1155	4A	IWA7304	28.4	wsnp_Ku_c792_1635317
1156	4A	IWA5265	30.8	wsnp_Ex_rep_c66551_64836462
1157	4A	IWA1836	31.3	wsnp_Ex_c13953_21832185
1158	4A	IWA1835	31.3	wsnp_Ex_c13953_21831752
1159	4A	IWA7126	31.3	wsnp_Ku_c5033_8989455
1160	4A	Xgwm160	36
1161	4B	IWA564	0	wsnp_Ex_c10869_17671164
1162	4B	IWA5358	0.7	wsnp_Ex_rep_c67136_65617520
1163	4B	Xwmc125	6.5
1164	4B	Xgwm6	17.5
1165	4B	Xwmc47	21.9
1166	4B	IWA3253	25.1	wsnp_Ku_c11665_18999583
1167	4B	IWA7172	25.1	wsnp_Ku_c5566_9864771
1168	4B	IWA3279	26.9	wsnp_Ex_c30473_39386277
1169	4B	IWA4115	26.9	wsnp_Ex_c5187_9195120
1170	4B	IWA3040	31.3	wsnp_Ex_c26285_35531535
1171	4B	IWA5365	32	wsnp_Ex_rep_c67159_65649966
1172	4B	IWA6461	32	wsnp_Ku_c12503_20174234
1173	4B	IWA3074	36.4	wsnp_Ex_c26807_36031771
1174	4B	IWA907	37.9	wsnp_CAP12_c1101_569479
1175	4B	IWA908	37.9	wsnp_Ex_c15708_24056750
1176	4B	IWA7752	40.8	wsnp_Ra_c22026_31453420
1177	4B	Xgwm251	44.3
1178	4B	Xwmc710	66.6
1179	4B	IWA4662	71.2	wsnp_Ex_c7362_12622736
1180	4B	IWA3290	73.5	wsnp_Ex_c30695_39579408
1181	4B	IWA1316	79.2	wsnp_Ex_c10347_16946522
1182	4B	IWA7268	79.2	wsnp_Ku_c7180_12403155
1183	4B	IWA8108	79.3	wsnp_Ra_c9755_16200944
1184	4B	IWA2298	79.4	wsnp_Ex_c18318_27140346
1185	4B	IWA8107	79.5	wsnp_Ra_c9755_16199734
1186	4B	IWA1768	84.8	wsnp_Ex_c13357_21054802
1187	4B	IWA506	86.3	wsnp_BF483640B_Ta_2_2
1188	4B	IWA7729	97.4	wsnp_Ra_c2078_4037878
1189	4B	IWA6457	98.5	wsnp_Ku_c12399_20037334
1190	4D	Xgdm125	0
1191	4D	Xwmc331	2.6
1192	4D	IWA3815	6.6	wsnp_Ex_c42133_48794975
1193	4D	IWA3555	7	wsnp_Ex_c3603_6584235
1194	4D	IWA3116	16
1195	4D	IWA6613	17.4	wsnp_Ku_c16998_25992746
1196	4D	Xwmc720	25.2
1197	4D	Xgdm129	26
1198	4D	Xbarc288	35.2
1199	5A	IWA6227	0	wsnp_JD_c940_1381378
1200	5A	IWA6226	0	wsnp_JD_c940_1381248
1201	5A	IWA4932	0
1202	5A	IWA4325	0	wsnp_Ex_c57094_58953404
1203	5A	IWA7801	0
1204	5A	IWA6022	0.7	wsnp_JD_c3632_4663459
1205	5A	IWA5368	15.5	wsnp_Ex_rep_c67179_65674582
1206	5A	IWA6859	15.9	wsnp_Ku_c29319_39227528
1207	5A	IWA825	24.9	wsnp_CAP11_c951_572693
1208	5A	IWA3530	27.2	wsnp_Ex_c356_698872
1209	5A	IWA1973	27.2	wsnp_Ex_c15046_23216392
1210	5A	IWA7061	27.2	wsnp_Ku_c4389_7970859
1211	5A	IWA8154	27.7	wsnp_Ra_rep_c69221_66574148
1212	5A	IWA3190	28.3	wsnp_Ex_c28827_37918346
1213	5A	IWA8155	28.3	wsnp_Ra_rep_c69221_66574260
1214	5A	IWA6287	28.8	wsnp_JD_rep_c52981_35792952
1215	5A	IWA3263	29.9	wsnp_Ku_c11988_19476255
1216	5A	IWA8201	33.2	wsnp_Ra_rep_c75364_72953286
1217	5A	IWA7624	33.2	wsnp_Ra_c14112_22155451
1218	5A	IWA7623	33.2	wsnp_Ra_c14112_22155312
1219	5A	IWA7473	33.2	wsnp_Ku_rep_c70261_69822367
1220	5A	IWA7392	33.2	wsnp_Ku_rep_c102220_89250165
1221	5A	IWA6237	33.2	wsnp_JD_c9771_10559815
1222	5A	IWA6196	33.2	wsnp_JD_c8448_9444839
1223	5A	IWA5914	33.2	wsnp_JD_c20604_18293112
1224	5A	IWA5295	33.2	wsnp_Ex_rep_c66733_65077608
1225	5A	IWA5120	33.2	wsnp_Ex_rep_c104567_89248000
1226	5A	IWA4450	33.2	wsnp_Ex_c6212_10842181
1227	5A	IWA4424	33.2	wsnp_Ex_c6117_10704945
1228	5A	IWA3212	33.2	wsnp_Ex_c29061_38130966
1229	5A	IWA2814	33.2	wsnp_Ex_c23509_32746806
1230	5A	IWA2548	33.2	wsnp_Ex_c20611_29693561
1231	5A	IWA2463	33.2	wsnp_Ex_c1981_3728899
1232	5A	IWA2354	33.2	wsnp_Ex_c18805_27686000
1233	5A	IWA2075	33.2	wsnp_Ex_c15950_24357724
1234	5A	IWA1697	33.2	wsnp_Ex_c12845_20371496
1235	5A	IWA278	33.2	wsnp_BE496976A_Ta_2_1
1236	5A	IWA8202	33.2	wsnp_Ra_rep_c75364_72953405
1237	5A	IWA155	33.5	wsnp_BE444644A_Ta_2_2
1238	5A	IWA1280	33.5	wsnp_Ex_c10109_16614013
1239	5A	IWA1465	33.9	wsnp_Ex_c11309_18272122
1240	5A	IWA1466	33.9	wsnp_Ex_c11309_18272248
1241	5A	IWA87	35.2	wsnp_BE426080A_Ta_2_1
1242	5A	IWA6415	37	wsnp_Ku_c11110_18216209
1243	5A	IWA8563	38.6	wsnp_RFL_Contig4136_4696148
1244	5A	IWA7687	39.4	wsnp_Ra_c18459_27525981
1245	5A	IWA5294	39.4	wsnp_Ex_rep_c66733_65077531
1246	5A	IWA3776	39.4	wsnp_Ex_c41347_48190370
1247	5A	IWA3220	39.4	wsnp_Ex_c2922_5391083
1248	5A	IWA1716	39.4	wsnp_Ex_c130_258776
1249	5A	IWA7980	39.4
1250	5A	IWA8048	40.1	wsnp_Ra_c6788_11804894
1251	5A	IWA7865	40.1	wsnp_Ra_c323_681466
1252	5A	IWA7759	40.1	wsnp_Ra_c2228_4310870
1253	5A	IWA7758	40.1	wsnp_Ra_c2228_4309233
1254	5A	IWA7669	40.1	wsnp_Ra_c17541_26430903
1255	5A	IWA7530	40.1	wsnp_Ra_c10053_16636851
1256	5A	IWA7226	40.1	wsnp_Ku_c644_1332610
1257	5A	IWA6912	40.1	wsnp_Ku_c328_679106
1258	5A	IWA6606	40.1	wsnp_Ku_c16812_25759885
1259	5A	IWA6166	40.1	wsnp_JD_c7404_8500079
1260	5A	IWA5431	40.1	wsnp_Ex_rep_c67636_66293429
1261	5A	IWA5175	40.1	wsnp_Ex_rep_c110023_92574403
1262	5A	IWA3921	40.1	wsnp_Ex_c4501_8092034
1263	5A	IWA3775	40.1	wsnp_Ex_c41347_48189975
1264	5A	IWA2815	40.1	wsnp_Ex_c23509_32746909
1265	5A	IWA1978	40.1	wsnp_Ex_c15084_23263641
1266	5A	IWA1718	40.1	wsnp_Ex_c130_259533
1267	5A	IWA1717	40.1	wsnp_Ex_c130_259006
1268	5A	IWA315	40.1	wsnp_BE498768A_Ta_2_1
1269	5A	IWA8119	40.1	wsnp_Ra_rep_c105791_89683548
1270	5A	IWA6412	41.2	wsnp_Ku_c1102_2211433
1271	5A	IWA7739	41.2	wsnp_Ra_c212_447994
1272	5A	Xgwm304	43.5
1273	5A	Xbarc186	44.6
1274	5A	Xgwm186	63.3
1275	5A	IWA2445	66.6	wsnp_Ex_c19647_28632659
1276	5A	IWA2374	69	wsnp_Ex_c19057_27975510
1277	5A	IWA8308	69.5	wsnp_RFL_Contig2187_1525458
1278	5A	IWA4049	69.5	wsnp_Ex_c4921_8764088
1279	5A	IWA4048	69.5	wsnp_Ex_c4921_8763722
1280	5A	IWA703	69.5	wsnp_CAP11_c2100_1109583
1281	5A	IWA138	69.5	wsnp_BE443745A_Ta_2_1
1282	5A	IWA6126	69.8	wsnp_JD_c6160_7327405
1283	5A	IWA739	71.6	wsnp_Ex_c13277_20936069
1284	5A	IWA7742	73.7	wsnp_Ra_c21347_30731133
1285	5A	IWA3646	74.8	wsnp_Ex_c3838_6980909
1286	5A	IWA3645	74.8	wsnp_Ex_c3838_6980774
1287	5A	IWA3283	74.8	wsnp_Ex_c30551_39457494
1288	5A	IWA4237	74.8	wsnp_Ex_c5461_9636197
1289	5A	Xwmc327	98.4
1290	5A	IWA2364	101.4	wsnp_Ex_c18941_27840933
1291	5A	IWA2365	101.8	wsnp_Ex_c18941_27841286
1292	5A	IWA2363	101.8	wsnp_Ex_c18941_27840714
1293	5A	IWA8537	101.8	wsnp_RFL_Contig3939_4369467
1294	5A	IWA6456	102.5	wsnp_Ku_c12211_19780409
1295	5A	IWA7665	103.2	wsnp_Ra_c17216_26044790
1296	5A	IWA4980	109.8	wsnp_Ex_c9927_16346100
1297	5A	IWA5945	112.3	wsnp_JD_c23511_20069005
1298	5A	IWA1343	113	wsnp_Ex_c24711_33964543
1299	5A	IWA4205	114.4	wsnp_Ex_c53983_57032473
1300	5A	IWA4207	114.4	wsnp_Ex_c53983_57033048
1301	5A	IWA5623	115.6	wsnp_Ex_rep_c69647_68598463
1302	5A	IWA2014	115.6	wsnp_Ex_c15342_23592789
1303	5A	IWA5624	115.6	wsnp_Ex_rep_c69647_68598487
1304	5A	IWA5842	116.8
1305	5A	IWA6637	116.8	wsnp_Ku_c17766_26919139
1306	5A	IWA7025	118.9	wsnp_Ku_c40349_48594583
1307	5A	IWA4860	118.9	wsnp_Ex_c898_1738424
1308	5A	IWA3087	118.9	wsnp_Ex_c27046_36265198
1309	5A	IWA4861	118.9	wsnp_Ex_c898_1739090
1310	5A	IWA2224	118.9	wsnp_Ex_c17523_26244256
1311	5A	IWA7026	118.9	wsnp_Ku_c40349_48594627
1312	5A	IWA6682	120.5	wsnp_Ku_c20011_29589289
1313	5A	IWA4468	120.5	wsnp_Ex_c62818_62296518
1314	5A	IWA3625	120.5	wsnp_Ex_c37943_45584325
1315	5A	IWA6683	120.5	wsnp_Ku_c20011_29589514
1316	5A	IWA5838	122.1	wsnp_JD_c13773_13680294
1317	5A	IWA4469	122.1	wsnp_Ex_c62818_62296773
1318	5A	IWA7553	122.1	wsnp_Ra_c10915_17838202
1319	5A	IWA6961	123.5	wsnp_Ku_c3684_6789632
1320	5A	IWA455	126.8	wsnp_CAP7_rep_c12539_5292305
1321	5A	IWA4398	126.8	wsnp_Ex_c5998_10513766
1322	5A	IWA5288	127.1	wsnp_Ex_rep_c66689_65011117
1323	5A	IWA4462	127.1	wsnp_Ex_c62466_62094396
1324	5A	IWA4220	127.1	wsnp_Ex_c54193_57155537
1325	5A	IWA590	127.1	wsnp_Ex_c11309_18272122
1326	5A	IWA454	127.1	wsnp_CAP7_c949_486600
1327	5A	IWA46	127.1	wsnp_BE442869A_Ta_2_1
1328	5A	IWA2	127.1	wsnp_be352570B_Ta_2_1
1329	5A	IWA4221	127.4	wsnp_Ex_c54193_57155632
1330	5A	IWA4449	128.3	wsnp_Ex_c621_1231444
1331	5A	IWA2256	128.8	wsnp_Ex_c17763_26513562
1332	5A	IWA4448	128.8	wsnp_Ex_c621_1231298
1333	5A	IWA2350	129.1	wsnp_Ex_c18754_27630557
1334	5A	IWA5040	129.4	wsnp_Ex_rep_c101994_87256479
1335	5A	IWA3887	129.4	wsnp_Ex_c44447_50496676
1336	5A	IWA2223	129.4	wsnp_Ex_c17476_26190830
1337	5A	IWA8320	129.4	wsnp_RFL_Contig2265_1693968
1338	5A	IWA7255	129.7	wsnp_Ku_c6977_12078791
1339	5A	IWA7256	129.7	wsnp_Ku_c6977_12078885
1340	5A	IWA4814	130.4	wsnp_Ex_c8543_14357385
1341	5A	IWA5173	130.4	wsnp_Ex_rep_c109532_92292121
1342	5A	IWA3705	139.9	wsnp_Ex_c40019_47166980
1343	5A	IWA3704	139.9	wsnp_Ex_c40019_47166796
1344	5A	IWA3703	139.9	wsnp_Ex_c40019_47166716
1345	5A	IWA674	139.9	wsnp_CAP11_c1506_840938
1346	5A	IWA7043	139.9	wsnp_Ku_c42416_50159250
1347	5A	IWA4744	141.4	wsnp_Ex_c790_1554988
1348	5A	IWA2959	142.9	wsnp_Ex_c2526_4715978
1349	5A	IWA3623	142.9	wsnp_Ex_c3772_6866645
1350	5A	IWA3702	144.8	wsnp_Ex_c40019_47165575
1351	5A	IWA675	144.8	wsnp_CAP11_c1506_840951
1352	5A	IWA7044	144.8	wsnp_Ku_c42416_50159402
1353	5A	IWA3355	149.4	wsnp_Ex_c31672_40435001
1354	5A	Xbarc319	152.2
1355	5A	IWA3083	199.4	wsnp_Ex_c26968_36188964
1356	5A	Xgwm291	208
1357	5B	IWA3184	0	wsnp_Ex_c2870_5296138
1358	5B	IWA6577	32.1	wsnp_Ku_c16116_24914891
1359	5B	IWA6579	32.8	wsnp_Ku_c16116_24915829
1360	5B	IWA6578	32.8	wsnp_Ku_c16116_24914991
1361	5B	IWA2682	32.8	wsnp_Ex_c2207_4136036
1362	5B	IWA2681	32.8	wsnp_Ex_c2207_4135530
1363	5B	IWA6580	32.8	wsnp_Ku_c16116_24916749
1364	5B	IWA2238	38.6	wsnp_Ex_c176_347707
1365	5B	IWA2100	40.7	wsnp_Ex_c16100_24532343
1366	5B	IWA2099	41.1	wsnp_Ex_c16100_24532224
1367	5B	IWA2865	41.5	wsnp_Ex_c24031_33277293
1368	5B	IWA2867	41.5	wsnp_Ex_c24031_33277856
1369	5B	IWA7374	44.3	wsnp_Ku_c9967_16591591
1370	5B	IWA4903	48.4	wsnp_Ex_c9362_15546626
1371	5B	IWA8391	49.4	wsnp_RFL_Contig2791_2558632
1372	5B	IWA4329	49.7	wsnp_Ex_c57209_59016692
1373	5B	IWA5802	49.7	wsnp_JD_c12221_12509932
1374	5B	IWA4726	51.1	wsnp_Ex_c7781_13255634
1375	5B	IWA2093	51.1	wsnp_Ex_c16045_24471413
1376	5B	IWA7310	51.1	wsnp_Ku_c8059_13763683
1377	5B	IWA2321	51.8	wsnp_Ex_c1857_3498024
1378	5B	IWA1061	51.8	wsnp_CAP7_c2269_1100432
1379	5B	IWA3360	51.8	wsnp_Ex_c3175_5864594
1380	5B	IWA6271	52.6	wsnp_JD_rep_c50403_34392266
1381	5B	IWA766	55.4	wsnp_CAP11_c442_324312
1382	5B	IWA6994	55.4	wsnp_Ku_c38713_47298856
1383	5B	IWA1786	57.5	wsnp_Ex_c1357_2598793
1384	5B	IWA7066	57.5	wsnp_Ku_c4427_8029592
1385	5B	IWA6902	60	wsnp_Ku_c3151_5892200
1386	5B	IWA3185	61.1	wsnp_Ex_c2870_5296539
1387	5B	IWA5804	61.4	wsnp_JD_c12269_12546501
1388	5B	IWA7903	61.4	wsnp_Ra_c38873_46699852
1389	5B	IWA1658	61.8	wsnp_Ex_c12599_20053652
1390	5B	IWA6732	71.8	wsnp_Ku_c23100_32990996
1391	5B	IWA197	71.8	wsnp_BF473744B_Ta_2_1
1392	5B	IWA196	71.8	wsnp_BE446509B_Ta_2_1
1393	5B	IWA1564	74.8	wsnp_Ex_c11951_19164786
1394	5B	IWA3214	76.2	wsnp_Ex_c29130_38196906
1395	5B	IWA3984	76.6	wsnp_Ex_c4710_8412517
1396	5B	IWA2388	87.9	wsnp_Ex_c1925_3632756
1397	5B	IWA7966	87.9	wsnp_Ra_c48052_53424490
1398	5B	IWA7585	89.1	wsnp_Ra_c12489_19996904
1399	5B	IWA7965	89.1	wsnp_Ra_c48052_53424445
1400	5B	IWA3394	89.8	wsnp_Ex_c32488_41134388
1401	5B	IWA4183	94.6	wsnp_Ex_c53426_56666554
1402	5B	IWA4184	95.7	wsnp_Ex_c53426_56666788
1403	5B	IWA4185	96	wsnp_Ex_c53426_56667282
1404	5B	IWA4182	96	wsnp_Ex_c53426_56666463
1405	5B	IWA7393	96	wsnp_Ku_rep_c102339_89347150
1406	5B	IWA1259	97.4	wsnp_CD454152B_Ta_2_1
1407	5B	IWA3500	98.5	wsnp_Ex_c34842_43092205
1408	5B	IWA2500	107	wsnp_Ex_c20019_29052512
1409	5B	IWA7791	107	wsnp_Ra_c25691_35261662
1410	5B	IWA4820	113.6	wsnp_Ex_c8633_14477407
1411	5B	IWA5551	113.6	wsnp_Ex_rep_c68600_67448893
1412	5B	IWA5552	115.5	wsnp_Ex_rep_c68600_67449494
1413	5B	Xgwm408	124.4
1414	5B	IWA2373	172.8	wsnp_Ex_c19041_27955460
1415	5B	IWA4003	173.1	wsnp_Ex_c47991_53037623
1416	5B	IWA1408	173.1	wsnp_Ex_c10947_17785235
1417	5B	IWA3644	178.9	wsnp_Ex_c3834_6972322
1418	5B	IWA3643	178.9	wsnp_Ex_c3834_6971712
1419	5B	IWA3642	178.9	wsnp_Ex_c3834_6971680
1420	5B	IWA3641	178.9	wsnp_Ex_c3834_6971529
1421	5B	IWA3640	178.9	wsnp_Ex_c3834_6971470
1422	5B	IWA6905	178.9	wsnp_Ku_c3201_5970486
1423	5B	IWA4416	212.6	wsnp_Ex_c607_1204908
1424	5B	IWA4415	212.6	wsnp_Ex_c607_1204733
1425	5B	IWA6402	212.6	wsnp_Ku_c10586_17464696
1426	5B	IWA4313	213.3	wsnp_Ex_c56629_58677561
1427	5B	IWA2915	214	wsnp_Ex_c2459_4591587
1428	5B	IWA7400	214	wsnp_Ku_rep_c103274_90057407
1429	5B	IWA5536	214.7	wsnp_Ex_rep_c68504_67334573
1430	5B	IWA3457	214.7	wsnp_Ex_c33932_42333941
1431	5B	IWA5537	214.7	wsnp_Ex_rep_c68504_67334656
1432	5B	IWA3606	217.6	wsnp_Ex_c37410_45162707
1433	5B	IWA3607	217.9	wsnp_Ex_c37410_45162932
1434	5B	IWA6251	217.9	wsnp_JD_rep_c48937_33188230
1435	5B	IWA332	222.4	wsnp_BE499835B_Ta_2_5
1436	5B	IWA421	222.4	wsnp_CAP12_rep_c5840_2647196
1437	5B	IWA7210	225.7	wsnp_Ku_c6125_10774396
1438	5B	IWA7209	225.7	wsnp_Ku_c6125_10773757
1439	5B	IWA7181	225.7	wsnp_Ku_c568_1187615
1440	5B	IWA7211	225.7	wsnp_Ku_c6125_10774533
1441	5B	IWA1777	239.4	wsnp_Ex_c13440_21171391
1442	5B	IWA7272	240.2	wsnp_Ku_c7199_12444840
1443	5B	IWA4494	240.2	wsnp_Ex_c6391_11109898
1444	5B	IWA4414	240.2	wsnp_Ex_c60683_61038062
1445	5B	IWA3890	240.2	wsnp_Ex_c44230_50338772
1446	5B	IWA1706	240.2	wsnp_Ex_c12909_20457660
1447	5B	IWA8005	240.2	wsnp_Ra_c5634_9952011
1448	5B	IWA1705	240.5	wsnp_Ex_c12909_20457407
1449	5B	IWA2071	240.5	wsnp_Ex_c15858_24246431
1450	5B	IWA6816	241.5	wsnp_Ku_c27243_37190781
1451	5B	IWA6568	241.5	wsnp_Ku_c15630_24304954
1452	5B	IWA6567	241.5	wsnp_Ku_c15630_24304828
1453	5B	IWA6447	241.5	wsnp_Ku_c11980_19464222
1454	5B	IWA5334	241.5	wsnp_Ex_rep_c66921_65344887
1455	5B	IWA4708	241.5	wsnp_Ex_c765_1506774
1456	5B	IWA4686	241.5	wsnp_Ex_c7483_12800686
1457	5B	IWA3101	241.5	wsnp_Ex_c27219_36436025
1458	5B	IWA1779	241.5	wsnp_Ex_c13468_21202450
1459	5B	IWA1176	241.5	wsnp_CAP8_c2693_1401039
1460	5B	IWA894	241.5	wsnp_Ex_c1541_2943791
1461	5B	IWA7857	241.5	wsnp_Ra_c31894_40964279
1462	5B	IWA4377	242.3	wsnp_Ex_c5915_10378599
1463	5B	IWA1965	243.6	wsnp_Ex_c1498_2868339
1464	5B	IWA1342	243.6	wsnp_Ex_c10545_17226769
1465	5B	IWA1084	243.6	wsnp_CAP7_c3665_1701376
1466	5B	IWA7609	243.6	wsnp_Ra_c13424_21239986
1467	5B	IWA7608	243.9	wsnp_Ra_c13424_21239985
1468	5B	IWA3209	244.2	wsnp_Ex_c2904_5355509
1469	5B	IWA5078	244.5	wsnp_Ex_rep_c103024_88075347
1470	5B	IWA4379	244.5	wsnp_Ex_c5915_10379277
1471	5B	IWA4378	244.5	wsnp_Ex_c5915_10378807
1472	5B	IWA5079	244.5	wsnp_Ex_rep_c103024_88075650
1473	5B	IWA6817	244.8	wsnp_Ku_c27243_37190877
1474	5B	IWA6556	244.8	wsnp_Ku_c1535_3032624
1475	5B	IWA6555	244.8	wsnp_Ku_c1535_3032624
1476	5B	IWA6521	244.8	wsnp_Ku_c14252_22506286
1477	5B	IWA6429	244.8	wsnp_Ku_c11721_19085513
1478	5B	IWA6065	244.8	wsnp_JD_c4585_5720296
1479	5B	IWA2930	244.8	wsnp_Ex_c2481_4632928
1480	5B	IWA2563	244.8	wsnp_Ex_c20988_30107609
1481	5B	IWA1781	244.8	wsnp_Ex_c13496_21243167
1482	5B	IWA1461	244.8	wsnp_Ex_c11275_18229524
1483	5B	IWA620	244.8	wsnp_Ex_c11474_18507872
1484	5B	IWA6908	244.8	wsnp_Ku_c32477_42086402
1485	5B	IWA396	245.8	wsnp_CAP12_c1461_744121
1486	5B	IWA4300	246.1	wsnp_Ex_c5632_9904112
1487	5B	IWA4158	246.1	wsnp_Ex_c53011_56395185
1488	5B	IWA3707	246.1	wsnp_Ex_c40022_47169752
1489	5B	IWA3706	246.1	wsnp_Ex_c40022_47169698
1490	5B	IWA3106	246.1	wsnp_Ex_c27272_36480685
1491	5B	IWA2597	246.1	wsnp_Ex_c2132_4006417
1492	5B	IWA2596	246.1	wsnp_Ex_c2132_4004831
1493	5B	IWA4862	246.1	wsnp_Ex_c8985_14979134
1494	5B	IWA2003	246.4	wsnp_Ex_c15304_23532301
1495	5B	IWA7127	246.7	wsnp_Ku_c50354_55979952
1496	5B	IWA6689	246.7	wsnp_Ku_c20701_30355248
1497	5B	IWA6344	246.7	wsnp_JG_c402_268605
1498	5B	IWA5280	246.7	wsnp_Ex_rep_c66651_64963120
1499	5B	IWA5279	246.7	wsnp_Ex_rep_c66651_64962429
1500	5B	IWA1776	246.7	wsnp_Ex_c13440_21170884
1501	5B	IWA8518	246.7	wsnp_RFL_Contig3811_4130639
1502	5B	IWA5289	247.4	wsnp_Ex_rep_c66696_65023462
1503	5B	IWA1585	247.4	wsnp_Ex_c12119_19382820
1504	5B	IWA1584	247.4	wsnp_Ex_c12119_19382764
1505	5B	IWA123	247.4	wsnp_BE443187B_Ta_2_1
1506	5B	IWA1588	247.7	wsnp_Ex_c12127_19394952
1507	5B	IWA303	247.7	wsnp_CAP11_c1656_909791
1508	5B	IWA302	247.7	wsnp_CAP11_c1541_857160
1509	5B	IWA301	247.7	wsnp_BE497820B_Ta_2_1
1510	5B	IWA4422	247.7	wsnp_Ex_c6100_10676217
1511	5B	IWA3633	248.4	wsnp_Ex_c3817_6937184
1512	5B	IWA2791	248.4	wsnp_Ex_rep_c68010_66754534
1513	5B	IWA5845	248.4
1514	5B	IWA5743	249.4	wsnp_Ex_rep_c75281_72691771
1515	5B	IWA6980	249.4
1516	5B	IWA6837	249.8	wsnp_Ku_c28245_38183393
1517	5B	Xbarc74	274
1518	5B	Xbarc89	275.2
1519	5B	Xgwm544	276.4
1520	5B	Xgwm540	276.4
1521	5D	IWA4969	0	wsnp_Ex_c9822_16203685
1522	5D	IWA2803	0.3	wsnp_Ex_c23358_32602315
1523	5D	IWA5012	7.4	wsnp_Ex_rep_c101445_86808057
1524	5D	IWA7250	7.7	wsnp_Ku_c6898_11962553
1525	5D	IWA6001	7.9	wsnp_JD_c3181_4176512
1526	5D	IWA6749	8.1	wsnp_Ku_c23864_33808174
1527	5D	IWA6496	8.4	wsnp_Ku_c13442_21433358
1528	5D	IWA8102	8.7	wsnp_Ra_c9233_15459255
1529	5D	IWA1172	8.9	wsnp_CAP8_c2589_1356390
1530	5D	IWA7243	9.1	wsnp_Ku_c6762_11762520
1531	5D	IWA4550	9.4	wsnp_Ex_c65985_64188864
1532	5D	IWA5366	9.4	wsnp_Ex_rep_c67164_65655648
1533	5D	IWA3733	9.4	wsnp_Ex_c40713_47713764
1534	5D	IWA7517	9.4	wsnp_Ku_rep_c72922_72561803
1535	5D	IWA2607	9.4	wsnp_Ex_c21386_30518206
1536	5D	Xgwm358	12.2
1537	5D	Xcfd40	13.9
1538	5D	IWA1428	0	wsnp_Ex_c11055_17927692
1539	5D	IWA1427	0	wsnp_Ex_c11055_17927668
1540	5D	IWA1429	0	wsnp_Ex_c11055_17927932
1541	5D	IWA2877	0	wsnp_Ex_rep_c69660_68614071
1542	5D	IWA2878	0.7	wsnp_Ex_rep_c69681_68639268
1543	5D	IWA1431	0.7	wsnp_Ex_c27150_36366168
1544	5D	Xgwm272	4.2
1545	6A	IWA4603	0	wsnp_Ex_c7002_12063380
1546	6A	IWA6116	0	wsnp_JD_c5872_7032077
1547	6A	IWA5704	1.4	wsnp_Ex_rep_c70675_69579757
1548	6A	IWA4602	1.4	wsnp_Ex_c7002_12063325
1549	6A	IWA6117	1.4	wsnp_JD_c5872_7032403
1550	6A	IWA3487	5.5	wsnp_Ex_c34597_42879693
1551	6A	IWA2705	6.3	wsnp_Ex_c2236_4189774
1552	6A	IWA3488	6.3	wsnp_Ex_c34597_42879718
1553	6A	IWA5398	8.8	wsnp_Ex_rep_c67436_66026057
1554	6A	IWA5783	10.9	wsnp_JD_c11443_11907542
1555	6A	IWA6355	10.9	wsnp_JG_c474_302785
1556	6A	IWA7764	11.6	wsnp_Ra_c2270_4383252
1557	6A	IWA6434	12.7	wsnp_Ku_c11846_19262918
1558	6A	IWA5523	28.9	wsnp_Ex_rep_c68369_67180429
1559	6A	IWA4950	28.9	wsnp_Ex_c965_1845676
1560	6A	IWA6775	28.9	wsnp_Ku_c25376_35340294
1561	6A	IWA7366	29.3	wsnp_Ku_c9763_16287132
1562	6A	IWA5142	29.3	wsnp_Ex_rep_c105594_89968727
1563	6A	IWA4949	29.3	wsnp_Ex_c965_1845447
1564	6A	IWA20	29.3	wsnp_BE403154A_Ta_2_9
1565	6A	IWA19	29.3	wsnp_BE403154A_Ta_2_1
1566	6A	IWA4951	30	wsnp_Ex_c965_1846161
1567	6A	Xwmc256	40.5
1568	6A	IWA7397	45.8	wsnp_Ku_rep_c102901_89769309
1569	6A	IWA7575	45.8	wsnp_Ra_c12086_19452422
1570	6A	IWA5940	46.2	wsnp_JD_c22766_19622512
1571	6A	IWA992	46.2	wsnp_CAP12_c928_486444
1572	6A	IWA654	46.2	wsnp_CAP11_c1178_684471
1573	6A	IWA8431	46.2	wsnp_RFL_Contig3136_3092151
1574	6A	IWA2918	49.5	wsnp_Ex_c24625_33881403
1575	6A	IWA224	49.5	wsnp_BE490226A_Ta_2_2
1576	6A	IWA8264	49.5	wsnp_RFL_Contig1871_1020122
1577	6A	IWA5028	52.4	wsnp_Ex_rep_c101695_87015546
1578	6A	IWA6986	54.9	wsnp_Ku_c38451_47086066
1579	6A	IWA5801	55.6	wsnp_JD_c1221_1769607
1580	6A	IWA6598	57.4	wsnp_Ku_c16490_25387869
1581	6A	IWA7582	58.1	wsnp_Ra_c12239_19659254
1582	6A	IWA7362	58.1	wsnp_Ku_c9583_16038698
1583	6A	IWA7237	58.1	wsnp_Ku_c67_136981
1584	6A	IWA6978	58.1	wsnp_Ku_c38215_46911010
1585	6A	IWA6586	58.1	wsnp_Ku_c16254_25099534
1586	6A	IWA6083	58.1	wsnp_JD_c4947_6076839
1587	6A	IWA4979	58.1	wsnp_Ex_c99215_85409445
1588	6A	IWA4739	58.1	wsnp_Ex_c7876_13389437
1589	6A	IWA4738	58.1	wsnp_Ex_c7876_13389283
1590	6A	IWA4263	58.1	wsnp_Ex_c55340_57883479
1591	6A	IWA4262	58.1	wsnp_Ex_c55340_57883276
1592	6A	IWA3866	58.1	wsnp_Ex_c43412_49738738
1593	6A	IWA3700	58.1	wsnp_Ex_c3997_7238372
1594	6A	IWA3670	58.1	wsnp_Ex_c3913_7100986
1595	6A	IWA3495	58.1	wsnp_Ex_c3472_6358437
1596	6A	IWA3494	58.1	wsnp_Ex_c3472_6357758
1597	6A	IWA3412	58.1	wsnp_Ex_c32765_41369642
1598	6A	IWA3259	58.1	wsnp_Ex_c30040_39007721
1599	6A	IWA3207	58.1	wsnp_Ex_c29025_38097560
1600	6A	IWA2960	58.1	wsnp_Ex_c25300_34566908
1601	6A	IWA2936	58.1	wsnp_Ex_c24958_34212226
1602	6A	IWA2688	58.1	wsnp_Ex_c22089_31270950
1603	6A	IWA2687	58.1	wsnp_Ex_c22089_31270755
1604	6A	IWA2685	58.1	wsnp_Ex_c22089_31269531
1605	6A	IWA1962	58.1	wsnp_Ex_c14975_23127669
1606	6A	IWA1029	58.1	wsnp_CAP7_c1290_650595
1607	6A	IWA731	58.1	wsnp_Ex_c1318_2520706
1608	6A	IWA2686	58.1	wsnp_Ex_c22089_31270140
1609	6A	IWA8033	58.1	wsnp_Ra_c6440_11246397
1610	6A	IWA5238	58.8	wsnp_Ex_rep_c66433_64661643
1611	6A	IWA1874	58.8	wsnp_Ex_c14192_22135363
1612	6A	IWA1589	58.8	wsnp_Ex_c12141_19415226
1613	6A	IWA1276	58.8	wsnp_Ex_c10087_16579529
1614	6A	IWA1048	58.8	wsnp_CAP7_c1839_907899
1615	6A	IWA5239	58.8	wsnp_Ex_rep_c66433_64662690
1616	6A	IWA1903	59.2	wsnp_Ex_c14502_22512364
1617	6A	IWA1873	59.2	wsnp_Ex_c14192_22135125
1618	6A	IWA1050	59.2	wsnp_CAP7_c1839_908093
1619	6A	IWA1049	59.2	wsnp_CAP7_c1839_908011
1620	6A	IWA6311	59.2	wsnp_JD_rep_c65080_41454656
1621	6A	IWA1875	60.9	wsnp_Ex_c14192_22135384
1622	6A	IWA5589	62.3	wsnp_Ex_rep_c69191_68104835
1623	6A	IWA508	62.3	wsnp_BF483993A_Ta_2_1
1624	6A	IWA6654	62.3	wsnp_Ku_c18534_27848426
1625	6A	IWA233	69	wsnp_BG313362A_Ta_2_1
1626	6A	IWA6806	70.2	wsnp_Ku_c26784_36747712
1627	6A	IWA6807	71.4	wsnp_Ku_c26784_36748247
1628	6A	IWA7443	83.7	wsnp_Ku_rep_c68790_67933679
1629	6A	IWA7445	83.7	wsnp_Ku_rep_c68790_67934209
1630	6A	IWA3321	84.5	wsnp_Ex_c31149_39976066
1631	6A	IWA1282	96.5	wsnp_Ex_c1011_1931797
1632	6A	IWA1338	99.4	wsnp_Ex_c1050_2009301
1633	6A	IWA1336	99.4	wsnp_Ex_c1050_2008598
1634	6A	IWA1335	99.4	wsnp_Ex_c1050_2008559
1635	6A	IWA647	99.4	wsnp_CAP11_c1114_653767
1636	6A	IWA6013	99.4	wsnp_JD_c3441_4455541
1637	6A	IWA1523	100.4	wsnp_Ex_c11621_18716254
1638	6A	IWA1284	100.4	wsnp_Ex_c1011_1932028
1639	6A	IWA7286	100.4	wsnp_Ku_c7458_12842353
1640	6A	IWA6630	101.2	wsnp_Ku_c17618_26749729
1641	6A	IWA8608	101.2	wsnp_RFL_Contig4601_5473822
1642	6A	IWA680	102.6	wsnp_CAP11_c1594_882280
1643	6A	IWA4962	112.4	wsnp_Ex_c9779_16145653
1644	6A	IWA4208	112.4	wsnp_Ex_c540_1074123
1645	6A	IWA1749	112.4	wsnp_Ex_c13230_20872924
1646	6A	IWA1205	112.4	wsnp_CAP8_c6680_3136899
1647	6A	IWA6601	112.4	wsnp_Ku_c16572_25480808
1648	6A	Xwmc671	116.5
1649	6A	Xgwm334	118.2
1650	6B	IWA2476	0	wsnp_Ex_c1988_3742022
1651	6B	IWA2479	0	wsnp_Ex_c1988_3742291
1652	6B	IWA2098	0.3	wsnp_Ex_c16090_24522660
1653	6B	IWA3982	0.6	wsnp_Ex_c4690_8386386
1654	6B	IWA3296	1.3	wsnp_Ex_c30813_39685940
1655	6B	IWA2060	2.4	wsnp_Ex_c15744_24102113
1656	6B	IWA5857	20.7	wsnp_JD_c15167_14703349
1657	6B	IWA5942	22.5	wsnp_JD_c2297_3138694
1658	6B	IWA4610	22.5	wsnp_Ex_c702_1382859
1659	6B	IWA3991	22.5	wsnp_Ex_c4728_8444212
1660	6B	IWA1901	22.5	wsnp_Ex_c14481_22485922
1661	6B	IWA5943	22.5	wsnp_JD_c23373_19987039
1662	6B	IWA4010	33	wsnp_Ex_c4815_8597064
1663	6B	IWA4011	33	wsnp_Ex_c4815_8597139
1664	6B	IWA52	34.5	wsnp_BE404947B_Ta_2_12
1665	6B	IWA1851	35.2	wsnp_Ex_c14031_21934513
1666	6B	IWA3229	40.4	wsnp_Ex_c2936_5416717
1667	6B	IWA3228	40.7	wsnp_Ex_c2936_5415651
1668	6B	IWA4760	41	wsnp_Ex_c8011_13584847
1669	6B	IWA4761	41	wsnp_Ex_c8011_13585237
1670	6B	IWA1764	41.3	wsnp_Ex_c13352_21044607
1671	6B	IWA4171	42	wsnp_Ex_c5335_9429726
1672	6B	IWA7257	50	wsnp_Ku_c7002_12116034
1673	6B	IWA1660	55.3	wsnp_Ex_c12618_20079758
1674	6B	IWA3411	55.6	wsnp_Ex_c3267_6026676
1675	6B	IWA3410	55.6	wsnp_Ex_c3267_6026545
1676	6B	IWA3301	55.6	wsnp_Ex_c30852_39719473
1677	6B	IWA7618	55.6	wsnp_Ra_c13949_21928888
1678	6B	IWA7929	56.3	wsnp_Ra_c4254_7754972
1679	6B	IWA5986	56.3	wsnp_JD_c2954_3925740
1680	6B	IWA7930	56.3	wsnp_Ra_c4254_7755493
1681	6B	IWA2975	56.6	wsnp_Ex_c25505_34771897
1682	6B	IWA2976	56.6	wsnp_Ex_c25505_34772008
1683	6B	IWA3869	57.6	wsnp_Ex_c43499_49801559
1684	6B	IWA3825	57.6	wsnp_Ex_c42372_48966781
1685	6B	IWA3450	57.6	wsnp_Ex_c33813_42239400
1686	6B	IWA2653	57.6	wsnp_Ex_c21783_30945248
1687	6B	IWA1151	57.6	wsnp_CAP8_c1540_889753
1688	6B	IWA7782	57.6	wsnp_Ra_c24962_34524503
1689	6B	IWA3459	58	wsnp_Ex_c34011_42398362
1690	6B	IWA1905	61.2	wsnp_Ex_c14530_22548314
1691	6B	IWA5056	61.2	wsnp_Ex_rep_c102159_87387134
1692	6B	IWA7808	61.6	wsnp_Ra_c2730_5190002
1693	6B	IWA7807	61.6	wsnp_Ra_c2730_5189836
1694	6B	IWA7689	61.6	wsnp_Ra_c18735_27835674
1695	6B	IWA5055	61.6	wsnp_Ex_rep_c102159_87386822
1696	6B	IWA4148	61.6	wsnp_Ex_c52615_56152839
1697	6B	IWA2937	61.6	wsnp_Ex_c24963_34217997
1698	6B	IWA7809	61.6	wsnp_Ra_c2730_5190076
1699	6B	IWA4827	61.9	wsnp_Ex_c8643_14492192
1700	6B	IWA4825	61.9	wsnp_Ex_c8643_14489243
1701	6B	IWA7452	61.9	wsnp_Ku_rep_c69252_68560829
1702	6B	IWA8134	63.7	wsnp_Ra_rep_c108218_91556581
1703	6B	IWA7937	63.7	wsnp_Ra_c4330_7871129
1704	6B	IWA7810	63.7	wsnp_Ra_c2730_5190365
1705	6B	IWA6467	63.7	wsnp_Ku_c12559_20252463
1706	6B	IWA6466	63.7	wsnp_Ku_c12559_20251082
1707	6B	IWA5888	63.7	wsnp_JD_c18284_16822042
1708	6B	IWA3923	63.7	wsnp_Ex_c45081_50974769
1709	6B	IWA3501	63.7	wsnp_Ex_c34962_43193869
1710	6B	IWA2219	63.7	wsnp_Ex_c17435_26144201
1711	6B	IWA1721	63.7	wsnp_Ex_c13034_20630123
1712	6B	IWA1640	63.7	wsnp_Ex_c1249_2399894
1713	6B	IWA8284	63.7	wsnp_RFL_Contig2014_1222146
1714	6B	IWA7625	64	wsnp_Ra_c14171_22234872
1715	6B	IWA7198	64	wsnp_Ku_c5891_10414090
1716	6B	IWA4826	64	wsnp_Ex_c8643_14489402
1717	6B	IWA4823	64	wsnp_Ex_c8643_14488538
1718	6B	IWA4824	64	wsnp_Ex_c8643_14488961
1719	6B	IWA4521	64	wsnp_Ex_c64847_63484965
1720	6B	IWA2420	64	wsnp_Ex_c19467_28423946
1721	6B	IWA2419	64	wsnp_Ex_c19467_28423331
1722	6B	IWA2417	64	wsnp_Ex_c19467_28422579
1723	6B	IWA1655	64	wsnp_Ex_c12556_19992074
1724	6B	IWA7979	64	wsnp_Ra_c50264_54965028
1725	6B	IWA6958	64.8	wsnp_Ku_c36658_45640758
1726	6B	Xgwm88	68.7
1727	6B	Xbarc198	69.1
1728	6B	Xwmc397	69.1
1729	6B	Xwmc756	69.5
1730	6B	IWA5266	71.9	wsnp_Ex_rep_c66552_64837613
1731	6B	IWA5267	71.9	wsnp_Ex_rep_c66552_64838102
1732	6B	IWA8011	72.6	wsnp_Ra_c57648_59682822
1733	6B	IWA7783	72.6	wsnp_Ra_c24962_34524602
1734	6B	IWA6293	72.6	wsnp_JD_rep_c63108_40258378
1735	6B	IWA4570	72.6	wsnp_Ex_c6740_11647359
1736	6B	IWA4515	72.6	wsnp_Ex_c6466_11234080
1737	6B	IWA3963	72.6	wsnp_Ex_c46160_51746546
1738	6B	IWA3933	72.6	wsnp_Ex_c45348_51169164
1739	6B	IWA3167	72.6	wsnp_Ex_c2849_5262491
1740	6B	IWA2244	72.6	wsnp_Ex_c17667_26408733
1741	6B	IWA2209	72.6	wsnp_Ex_c17349_26035281
1742	6B	IWA2135	72.6	wsnp_Ex_c16466_24967033
1743	6B	IWA2090	72.6	wsnp_Ex_c1603_3056226
1744	6B	IWA8539	72.6	wsnp_RFL_Contig3943_4376736
1745	6B	IWA4599	73.3	wsnp_Ex_c698_1376989
1746	6B	IWA3878	74	wsnp_Ex_c43809_50018316
1747	6B	IWA4078	74	wsnp_Ex_c5058_8981554
1748	6B	IWA3796	74.7	wsnp_Ex_c41790_48535809
1749	6B	IWA1815	74.7	wsnp_Ex_c13816_21656469
1750	6B	IWA450	74.7	wsnp_CAP7_c7742_3467376
1751	6B	IWA3797	74.7	wsnp_Ex_c4180_7550457
1752	6B	IWA451	75	wsnp_CAP7_c90_52035
1753	6B	IWA1500	76.4	wsnp_Ex_c1145_2198433
1754	6B	IWA5346	76.7	wsnp_Ex_rep_c67012_65465394
1755	6B	IWA7628	76.7	wsnp_Ra_c14498_22667649
1756	6B	IWA1499	77	wsnp_Ex_c1145_2198295
1757	6B	IWA4502	77.3	wsnp_Ex_c6401_11124792
1758	6B	IWA4501	77.3	wsnp_Ex_c6401_11124623
1759	6B	IWA4500	77.3	wsnp_Ex_c6401_11124462
1760	6B	IWA1501	77.3	wsnp_Ex_c1145_2199269
1761	6B	IWA1251	77.3	wsnp_CD452643B_Ta_2_1
1762	6B	IWA4503	77.3	wsnp_Ex_c6401_11124940
1763	6B	IWA971	77.6	wsnp_CAP12_c527_285541
1764	6B	IWA755	77.6	wsnp_CAP11_c3599_1741800
1765	6B	IWA7962	77.6	wsnp_Ra_c47601_53118036
1766	6B	IWA5044	78.4	wsnp_Ex_rep_c102059_87307390
1767	6B	IWA5045	78.4	wsnp_Ex_rep_c102059_87307700
1768	6B	IWA7189	79.7	wsnp_Ku_c5744_10166561
1769	6B	IWA6420	79.7	wsnp_Ku_c11422_18657479
1770	6B	IWA5625	79.7	wsnp_Ex_rep_c69660_68614071
1771	6B	IWA4484	79.7	wsnp_Ex_c6356_11055912
1772	6B	IWA4436	79.7	wsnp_Ex_c6143_10747716
1773	6B	IWA4435	79.7	wsnp_Ex_c6143_10747643
1774	6B	IWA3172	79.7	wsnp_Ex_c2854_5270318
1775	6B	IWA2085	79.7	wsnp_Ex_c16002_24419222
1776	6B	IWA1857	79.7	wsnp_Ex_c14101_22012676
1777	6B	IWA7648	79.7	wsnp_Ra_c16267_24877418
1778	6B	IWA4485	80	wsnp_Ex_c6356_11056222
1779	6B	IWA3574	80	wsnp_Ex_c3640_6644345
1780	6B	IWA4486	80	wsnp_Ex_c6356_11056696
1781	6B	IWA3899	80.3	wsnp_Ex_c44510_50547245
1782	6B	IWA3679	80.3	wsnp_Ex_c3940_7144946
1783	6B	IWA3354	80.3	wsnp_Ex_c31670_40433594
1784	6B	IWA1017	80.3	wsnp_CAP12_rep_c8688_3644383
1785	6B	IWA800	80.3	wsnp_CAP11_c681_443861
1786	6B	IWA7084	80.3	wsnp_Ku_c4565_8238445
1787	6B	IWA4384	82.1	wsnp_Ex_c5936_10412246
1788	6B	IWA2039	82.1	wsnp_Ex_c15595_23910900
1789	6B	IWA1434	82.1	wsnp_Ex_c11073_17956329
1790	6B	IWA6660	82.1	wsnp_Ku_c1876_3666308
1791	6B	IWA3234	82.6	wsnp_Ex_c29867_38850724
1792	6B	IWA3801	83.2	wsnp_Ex_c4190_7567262
1793	6B	IWA3651	83.2	wsnp_Ex_c3854_7003482
1794	6B	IWA3650	83.2	wsnp_Ex_c3854_7003399
1795	6B	IWA4564	83.2	wsnp_Ex_c6674_11544930
1796	6B	IWA4383	84.3	wsnp_Ex_c5936_10411877
1797	6B	IWA7111	84.8	wsnp_Ku_c4834_8676678
1798	6B	IWA4382	84.8	wsnp_Ex_c5936_10411772
1799	6B	IWA2173	84.8	wsnp_Ex_c16836_25401702
1800	6B	IWA8462	84.8	wsnp_RFL_Contig3380_3491589
1801	6B	IWA1472	86	wsnp_Ex_c11348_18325887
1802	6B	IWA2346	86	wsnp_Ex_c18744_27620403
1803	6B	IWA8037	87.2	wsnp_Ra_c66232_64690650
1804	6B	IWA7487	87.2	wsnp_Ku_rep_c70981_70666627
1805	6B	IWA6005	87.2	wsnp_JD_c3240_4243386
1806	6B	IWA3769	87.2	wsnp_Ex_c4124_7455225
1807	6B	IWA3768	87.2	wsnp_Ex_c4124_7455032
1808	6B	IWA3735	87.2	wsnp_Ex_c40732_47728890
1809	6B	IWA3636	87.2	wsnp_Ex_c38209_45794954
1810	6B	IWA2773	87.2	wsnp_Ex_c23010_32232119
1811	6B	IWA2347	87.2	wsnp_Ex_c18744_27620431
1812	6B	IWA1473	87.2	wsnp_Ex_c11348_18326158
1813	6B	IWA1263	87.2	wsnp_CD454706B_Ta_1_1
1814	6B	IWA676	87.2	wsnp_Ex_c12433_19826311
1815	6B	IWA297	87.2	wsnp_BE497701B_Ta_2_1
1816	6B	IWA225	87.2	wsnp_BE490226B_Ta_1_2
1817	6B	IWA8566	87.2	wsnp_RFL_Contig4180_4784206
1818	6B	IWA283	87.5	wsnp_BE496986B_Ta_2_2
1819	6B	IWA2830	87.5	wsnp_Ex_c23716_32952372
1820	6B	IWA219	88.2	wsnp_BE490147B_Ta_2_1
1821	6B	IWA634	92	wsnp_BQ171182B_Ta_1_1
1822	6B	IWA8383	92	wsnp_RFL_Contig2747_2479869
1823	6B	Xgwm219	104
1824	6B	IWA7056	108.5	wsnp_Ku_c43368_50890819
1825	6B	IWA1816	109.6	wsnp_Ex_c1383_2651887
1826	6B	IWA1817	109.6	wsnp_Ex_c1383_2652398
1827	6B	IWA4717	110	wsnp_Ex_c7713_13153321
1828	6B	IWA349	113.6	wsnp_BE518379B_Ta_2_2
1829	6B	IWA2212	116.1	wsnp_Ex_c17379_26073344
1830	6B	IWA7479	116.1	wsnp_Ku_rep_c70721_70356213
1831	6B	IWA5709	116.9	wsnp_Ex_rep_c70767_69655253
1832	6B	IWA7116	119.4	wsnp_Ku_c4910_8793327
1833	6B	IWA7931	125.4	wsnp_Ra_c42758_49640129
1834	6B	IWA4868	125.8	wsnp_Ex_c9038_15058264
1835	6B	IWA1485	126.1	wsnp_Ex_c11379_18370982
1836	6B	IWA4869	126.1	wsnp_Ex_c9038_15058444
1837	6B	IWA1484	126.5	wsnp_Ex_c11379_18370310
1838	6B	IWA6179	132.2	wsnp_JD_c7793_8866097
1839	6B	IWA6141	132.2	wsnp_JD_c6439_7601968
1840	6B	IWA6140	132.2	wsnp_JD_c6439_7601847
1841	6B	IWA5204	132.2	wsnp_Ex_rep_c66342_64519823
1842	6B	IWA6864	132.2	wsnp_Ku_c2956_5558754
1843	6B	IWA824	138.3	wsnp_CAP11_c949_571734
1844	6B	IWA3880	139.6	wsnp_Ex_c4391_7909906
1845	6D	Xcfd60	0
1846	6D	IWA2637	3	wsnp_Ex_c21688_30845705
1847	6D	IWA7490	3	wsnp_Ku_rep_c71225_70941765
1848	6D	IWA2638	3	wsnp_Ex_c21688_30845899
1849	6D	IWA6631	3	wsnp_Ku_c1765_3452586
1850	6D	IWA3910	3.7	wsnp_Ex_c4480_8055163
1851	6D	IWA3913	3.7	wsnp_Ex_c4480_8056354
1852	6D	IWA3912	3.7	wsnp_Ex_c4480_8056013
1853	6D	IWA3909	3.7	wsnp_Ex_c4480_8054926
1854	6D	IWA3926	3.7	wsnp_Ex_c4518_8119503
1855	6D	IWA3914	3.7	wsnp_Ex_c4480_8057184
1856	6D	IWA3911	3.7	wsnp_Ex_c4480_8055475
1857	6D	IWA1741	4	wsnp_Ex_c13188_20825019
1858	6D	IWA3291	10.2	wsnp_Ex_c30754_39633791
1859	6D	IWA8060	10.2	wsnp_Ra_c7200_12462543
1860	6D	IWA2968	10.5	wsnp_Ex_c25390_34655531
1861	6D	IWA2967	10.5	wsnp_Ex_c25390_34655262
1862	6D	IWA6939	10.5	wsnp_Ku_c3459_6406579
1863	6D	IWA5181	10.5	wsnp_Ex_rep_c110800_93014110
1864	6D	IWA2966	10.5	wsnp_Ex_rep_c98716_85134786
1865	6D	IWA5180	10.5	wsnp_Ex_rep_c110800_93013978
1866	6D	IWA2965	10.5	wsnp_Ex_c25390_34654575
1867	6D	IWA1384	11.6	wsnp_Ex_c10718_17457870
1868	6D	IWA4000	0	wsnp_Ex_c4789_8550135
1869	6D	IWA2338	0	wsnp_Ex_c18664_27540364
1870	6D	IWA2339	0	wsnp_Ex_c18664_27540810
1871	6D	IWA1896	1.1	wsnp_Ex_c14439_22426200
1872	6D	IWA6625	1.4	wsnp_Ku_c17328_26400537
1873	6D	IWA5576	1.4	wsnp_Ex_rep_c69023_67923545
1874	6D	IWA1895	1.4	wsnp_Ex_c14439_22424715
1875	6D	IWA3461	2.5	wsnp_Ex_c3405_6252997
1876	6D	IWA984	3.7	wsnp_CAP12_c720_382116
1877	6D	Xcfd49	8.1
1878	6D	Xcfd76	0
1879	6D	IWA4307	4.8	wsnp_Ex_c56443_58561683
1880	6D	IWA7816	9.2	wsnp_Ra_c27787_37299352
1881	7A	IWA5904	0	wsnp_JD_c19925_17854742
1882	7A	IWA7005	0	wsnp_Ku_c3929_7189422
1883	7A	IWA5873	5.8	wsnp_JD_c1635_2290177
1884	7A	IWA794	5.8	wsnp_Ex_c14138_22066009
1885	7A	IWA6833	5.8	wsnp_Ku_c28104_38042857
1886	7A	IWA795	6.1	wsnp_CAP11_c639_424134
1887	7A	IWA736	6.4	wsnp_CAP11_c298_250735
1888	7A	IWA737	6.4	wsnp_CAP11_c298_250917
1889	7A	IWA179	7.2	wsnp_BE445506A_Ta_2_2
1890	7A	Xwmc525	12.7
1891	7A	IWA4176	15.6	wsnp_Ex_c53387_56640789
1892	7A	IWA4173	15.6	wsnp_Ex_c53387_56639804
1893	7A	IWA7728	15.6	wsnp_Ra_c2063_4012957
1894	7A	IWA5379	15.9	wsnp_Ex_rep_c67286_65825610
1895	7A	IWA4887	15.9	wsnp_Ex_c916_1767286
1896	7A	IWA4434	15.9	wsnp_Ex_c6142_10746442
1897	7A	IWA4433	15.9	wsnp_Ex_c6142_10746143
1898	7A	IWA4364	15.9	wsnp_Ex_c5839_10246915
1899	7A	IWA4363	15.9	wsnp_Ex_c5839_10246812
1900	7A	IWA1519	15.9	wsnp_Ex_c1159_2225596
1901	7A	IWA1271	15.9	wsnp_Ex_c10024_16489505
1902	7A	IWA8057	15.9	wsnp_Ra_c7112_12318340
1903	7A	IWA1515	16.2	wsnp_Ex_c1159_2223749
1904	7A	IWA4137	16.2	wsnp_Ex_c52413_56019420
1905	7A	IWA4175	16.5	wsnp_Ex_c53387_56639949
1906	7A	IWA4177	16.8	wsnp_Ex_c53387_56641291
1907	7A	IWA2929	18.2	wsnp_Ex_c24796_34049469
1908	7A	IWA4594	20	wsnp_Ex_c6961_11998812
1909	7A	IWA7185	20.3	wsnp_Ku_c5693_10079343
1910	7A	IWA6115	20.3	wsnp_JD_c5861_7018974
1911	7A	IWA4595	20.3	wsnp_Ex_c6961_12000176
1912	7A	IWA2905	20.3	wsnp_Ex_c24486_33732900
1913	7A	IWA84	20.3	wsnp_BE425120A_Ta_2_1
1914	7A	IWA2723	46.8	wsnp_Ex_c22547_31737663
1915	7A	IWA2724	46.8	wsnp_Ex_c22547_31738007
1916	7A	IWA7028	53.2	wsnp_Ku_c4035_7363089
1917	7A	IWA7709	53.6	wsnp_Ra_c19741_28965647
1918	7A	IWA7027	53.6	wsnp_Ku_c4035_7363053
1919	7A	IWA1363	53.6	wsnp_Ex_c10617_17320668
1920	7A	Xwmc790	62.1
1921	7A	IWA7406	65.8	wsnp_Ku_rep_c103889_90513052
1922	7A	IWA5167	65.8	wsnp_Ex_rep_c108367_91621570
1923	7A	IWA4621	65.8	wsnp_Ex_c7071_12171619
1924	7A	IWA4620	65.8	wsnp_Ex_c7071_12171222
1925	7A	IWA3128	65.8	wsnp_Ex_c27898_37058842
1926	7A	IWA7407	65.8	wsnp_Ku_rep_c103889_90513365
1927	7A	IWA6680	67.2	wsnp_Ku_c19943_29512612
1928	7A	IWA7601	73.7	wsnp_Ra_c1308_2604804
1929	7A	IWA4911	74.8	wsnp_Ex_c9428_15641639
1930	7A	IWA4910	74.8	wsnp_Ex_c9428_15641609
1931	7A	IWA6535	74.8
1932	7A	IWA1726	77	wsnp_Ex_c1309_2503198
1933	7A	IWA1425	77	wsnp_Ex_c11047_17915225
1934	7A	IWA1424	77	wsnp_Ex_c11047_17915103
1935	7A	IWA7045	77	wsnp_Ku_c42539_50247333
1936	7A	IWA1110	99.2	wsnp_CAP7_c949_486485
1937	7A	IWA1111	99.2	wsnp_CAP7_c949_486600
1938	7A	IWA1421	100.3	wsnp_Ex_c11035_17897914
1939	7A	IWA7650	100.6	wsnp_Ra_c16287_24904962
1940	7A	IWA3639	100.6	wsnp_Ex_c38326_45883440
1941	7A	IWA1502	100.6	wsnp_Ex_c1146_2200823
1942	7A	IWA7651	100.6	wsnp_Ra_c16287_24905062
1943	7A	IWA4002	102	wsnp_Ex_c47919_52987043
1944	7A	IWA3701	102	wsnp_Ex_c40011_47158369
1945	7A	IWA3668	102	wsnp_Ex_c39119_46485649
1946	7A	IWA635	102	wsnp_BQ171683A_Ta_2_1
1947	7A	IWA476	102	wsnp_BF474379A_Ta_2_1
1948	7A	IWA5207	102	wsnp_Ex_rep_c66349_64528826
1949	7A	IWA7718	104.1	wsnp_Ra_c20189_29442564
1950	7A	IWA2945	108.5	wsnp_Ex_c25025_34285478
1951	7A	IWA3187	108.5	wsnp_Ex_c28707_37811644
1952	7A	IWA3351	110	wsnp_Ex_c3162_5840427
1953	7A	IWA6764	110.7	wsnp_Ku_c24742_34711973
1954	7A	IWA6159	110.7	wsnp_JD_c7043_8152391
1955	7A	IWA5727	110.7	wsnp_Ex_rep_c71217_70021470
1956	7A	IWA2693	110.7	wsnp_Ex_c2219_4159221
1957	7A	IWA1554	110.7	wsnp_Ex_c11928_19131833
1958	7A	IWA1477	110.7	wsnp_Ex_c11350_18330527
1959	7A	IWA6936	110.7	wsnp_Ku_c340_706774
1960	7A	IWA2497	111.4	wsnp_Ex_c200_391493
1961	7A	IWA7855	112.1	wsnp_Ra_c31751_40835513
1962	7A	IWA6029	112.1	wsnp_JD_c38071_27729494
1963	7A	IWA6028	112.1	wsnp_JD_c38071_27729378
1964	7A	IWA5887	112.1	wsnp_JD_c18167_16742264
1965	7A	IWA486	112.1	wsnp_CAP8_c6939_3242530
1966	7A	IWA8122	112.1	wsnp_Ra_rep_c105976_89839782
1967	7A	IWA797	112.8	wsnp_Ex_c14156_22088409
1968	7A	IWA796	112.8	wsnp_Ex_c14156_22088409
1969	7A	IWA798	112.8	wsnp_Ex_c14173_22107343
1970	7A	IWA5841	113.8	wsnp_JD_c13991_13843599
1971	7A	IWA5644	113.8	wsnp_Ex_rep_c69838_68798283
1972	7A	IWA4043	113.8	wsnp_Ex_c48973_53712625
1973	7A	IWA759	113.8	wsnp_CAP11_c383_294401
1974	7A	IWA5895	113.8	wsnp_JD_c18814_17164689
1975	7A	IWA7769	114.5	wsnp_Ra_c23253_32762188
1976	7A	IWA6569	114.5	wsnp_Ku_c15719_24419781
1977	7A	IWA5867	114.5	wsnp_JD_c15755_15117800
1978	7A	IWA5860	114.5	wsnp_JD_c15333_14824351
1979	7A	IWA5645	114.5	wsnp_Ex_rep_c69838_68799256
1980	7A	IWA4168	114.5	wsnp_Ex_c5330_9422384
1981	7A	IWA4166	114.5	wsnp_Ex_c5330_9421979
1982	7A	IWA3900	114.5	wsnp_Ex_c44547_50572744
1983	7A	IWA3778	114.5	wsnp_Ex_c41465_48279111
1984	7A	IWA3318	114.5	wsnp_Ex_c31123_39956138
1985	7A	IWA3232	114.5	wsnp_Ex_c29371_38412298
1986	7A	IWA2252	114.5	wsnp_Ex_c17693_26439725
1987	7A	IWA2250	114.5	wsnp_Ex_c17693_26438399
1988	7A	IWA1842	114.5	wsnp_Ex_c14009_21899923
1989	7A	IWA1277	114.5	wsnp_Ex_c10094_16590615
1990	7A	IWA246	114.5	wsnp_be494028A_Ta_2_1
1991	7A	IWA127	114.5	wsnp_be443312A_Ta_2_1
1992	7A	Xwmc603	118
1993	7A	Xbarc222	131.8
1994	7A	Xwmc83	136.1
1995	7A	IWA4426	143.3	wsnp_Ex_c61210_61355280
1996	7A	IWA6802	143.3	wsnp_Ku_c26530_36497050
1997	7A	IWA3832	145.1	wsnp_Ex_c42653_49180603
1998	7A	IWA3831	145.1	wsnp_Ex_c42653_49180485
1999	7A	IWA2535	145.1	wsnp_Ex_c2043_3829362
[truncated: 174 more rows]
